# Supplementary material
Source: PubMed Central journal article supplement (PMC2947357)
Supplement: NIHMS231118-supplement-Supplementary_Figures___Tables.pdf [file NIHMS231118-supplement-Supplementary_Figures___Tables.pdf]

## **METHODS**

**Sample collection and genotyping:** IRB approval for this project was obtained from the University of Maryland at College Park, the University of Pennsylvania, and Vanderbilt University. Written informed consent was obtained from all participants and research/ethics approval and permits were obtained from the following institutions prior to sample collection: COSTECH and NIMR in Dar es Salaam, Tanzania; KEMRI in Nairobi, Kenya; the University of Khartoum in Sudan; Regional Hospital Sunyani, Ghana; the Nigerian Institute for Research and Pharmacological Development, Abuja, Nigeria; the Ministry of Health and National Committee of Ethics, Cameroon; the University of Bamako Faculty of Medicine, Pharmacy, and Odonto-stomatology (FMPOS) Ethics Committee, Mali; for the South African samples, ethical clearance was obtained and a material transfer agreement signed with the University of Stellenbosch for use of the samples in the current study and approval was also obtained from Dr. Roger Chennels and the Working Group of Indigenous Minorities in Southern Africa (WIMSA). Self-identified ethnicity, parent and grandparent information was recorded. Use of the African American samples was approved by the Protocol Review Office of the Institutional Review Board of the National Cancer Institute and informed consent was obtained from all individuals at the study sites prior to sample collection. Ethnic groups, sample size, language classification, and subsistence classification are given in **Table S1**. For the Kenyan, Sudanese, Nigerian, and Cameroonian samples, white cells were isolated in the field from whole blood with a salting out procedure modified from (S1) and DNA was extracted in the lab with a Purgene™ DNA extraction kit (Gentra Systems Inc., Minneapolis, MN). Dogon samples were obtained from blood spots donated by participants in a cohort study of malaria incidence in Bandiagara, Mali. Ghanaian DNA was extracted onsite from whole blood, with the Purgene™ DNA extraction kit. The Ju-speaking !Xun (*a.k.a.* Vasekela) and Khoe-speaking Khwe samples were collected from individuals in the area of Schmidtsdrift in the North-West Cape of South Africa. The Cape Mixed Ancestry (CMA) population, commonly referred to as Cape Coloured in South Africa, was collected in the Western Cape Province. The Dogon sample was collected in Bandiagara, Mali. Nigerian samples were collected in Abuja and Adamawa State districts. Cameroon samples were collected from the Eastern Province (Baka Pygmies and neighboring Bantu groups), Southern and Ocean Provinces (Bakola Pygmies and neighboring Bantu groups and coastal groups), Center Provinces (Medzan Pygmies and neighboring groups, mostly Bantu populations), Western Province (Bamileke and Mbororo Fulani groups), Extreme North Province (Mandara mountains and northern plains; Fulani and Afroasiatic/Nilo-Saharan speaking populations). All Cameroonians were sampled in their native village; the Hausa sample (a population who emigrated mainly from the Kano area two generations ago) was sampled in the city of Yaounde. Samples from Chad, CAR, Congo, DRC and Rwanda were obtained from individuals who recently immigrated to Cameroon. Tanzanian DNA samples were collected from individuals residing in the Arusha and Dodoma provinces of Tanzania. Samples from Kenyan populations of southern Ethiopian origin (Burji, Konso) were collected in the Rift valley, Nyanza, and Eastern provinces of Kenya. Sudanese samples were collected in the Khartoum and Kasala provinces of the Sudan. The Yemenite Temani and Ethiopian Beta Israel samples were purchased from the National Laboratory for the Genetics of Israeli Populations (S2). The South African !Xun/Khoe, Xhosa,

Vende, Cape Mixed Ancestry (CMA), Yemenite Temani, Beta Israel, and the Malian Dogon DNA samples were amplified by Whole Genome Amplification (WGA) with Illustra GenomiPhi HY™ kits provided by GE-Healthcare (Buckinghamshire, UK). It should be noted that the DNA for the Dogon population extracted from blood spots appeared to be of lower quality and microsatellite markers did not amplify as well as other samples obtained from whole blood (43% of markers had missing data).

**Data description:** The full panel of Marshfield markers from screening sets #16 and #54 (microsatellites) and #101 (indels) were initially genotyped in 3,325 individuals (3,194 Africans, 109 African Americans, 22 Yemenites) sent to the Marshfield clinic for genotyping (a total of 40ug DNA/individual at a concentration of ~20ng/ul was used for genotyping). Genotyping data is available at (S3). Relatives were identified and removed as described below. Approximately 1% of the markers were removed because they consistently failed to amplify. **Table S1** gives the average percent of genotypes that were missing due to either failed genotyping or to not having the marker in all datasets. Of the original 3,325 individuals genotyped, we removed the following individuals from subsequent analyses: 737 individuals who were inferred to be third degree or more closely related relatives (see below), 33 individuals with low genotyping success, two single individual representatives of population samples (Fante/Ewe and Nuba), and one individual who was an outlier in the PCA analysis (see below). The remaining dataset used for subsequent analyses consisted of 2,432 individuals from 113 African populations, 21 individuals from one Yemenite population and 98 African Americans from four locations in the United States (**Table S1**). Data coverage was 95.7% (4.3% of the sample/marker combinations yielded missing data).

**Data integration:** To combine our dataset with preexisting data and place African genetic variability into a worldwide context, our data were integrated with data previously genotyped in the H952 subset of 1,048 samples in the CEPH-HGDP (S4, S5), 432 samples of Indian descent from 15 populations (S6), and 10 Native Australian samples of unknown ethnic population origin (provided by European Collection of Cell Cultures, Salisbury, UK). A table of marker size adjustments (to account for changes in the PCR primers used in different Marshfield screening sets) and allele size adjustments are shown in **Table S2**. The combined dataset contains a total of 1,327 genotyped markers (consisting of 848 microsatellites, 476 indels and 3 SNPs) and 3,945 DNA samples (of which 2,566 are from Africa). The overall overlap of markers genotyped in the combined dataset is 80% (not all markers were genotyped in all populations), resulting in total of ~4,000,000 genotypes.

**Ascertainment Bias (AB) in the microsatellite marker set:** 374 of the Marshfield markers (the GATA microsatellite repeats) were ascertained in individuals of recent European ancestry and 953 non-GATA markers were ascertained in a world-wide panel. Therefore, we tested for the possibility of ascertainment bias in the GATA markers. A significant deviation between the European and non-European samples in the ratio of GATA to non-GATA population variances was found (Mann-Whitney *U* test,  $U=1030$ ,  $Z=2.97$ ,  $p=1.49 \times 10^{-3}$ ). This deviation is in the direction of higher relative levels of variability in the Europeans with European ascertained GATA repeat markers compared

to the non-GATA markers that were ascertained in a world-wide panel, consistent with an effect of population ascertainment bias in a subset of these markers (**Fig. S35**). Because of the potential effects of AB, these markers were removed from the estimates of genetic diversity on the basis of microsatellite allele variance and heterozygosity.

**Detection of relative pairs:** Relative pairs and duplicated samples in the dataset were inferred from the pattern of shared genotypes and population allele frequencies with RELPAIR 2.0.1 (S6-8). Because the inclusion of closely related individuals can impact population genetic inferences (e.g. (S9)), we took the conservative approach of excluding individuals inferred to be third degree or more closely related, including inferred relative pairs between regional ethnic populations (e.g. all Tanzanian populations). An exception was made in the case of the Dogon as it is difficult to reliably infer relative pairs in a small sample and the Dogon are highly distinctive and could not be readily merged with other populations to improve allele frequency estimates. Merging the Dogon with other non-Pygmy West African populations inferred four unrelated individuals in the sample, but this may be overly conservative given the distinctiveness of the Dogon sample from other West Africans. Also, the Dogon are the only representatives from Mali in our study and since the sample size is already small we did not want to further reduce the sample size in the analyses, especially if the relative pair estimates were questionable. Therefore, RELPAIR inferred relative pairs among the Dogon were not excluded. In total 737 individuals were removed. Networks of relatives, which in some cases were quite complex, were plotted with neato from the GraphViz software package (S10), which was used to select the minimum number of individuals to exclude to break up networks of relative pairs.

**Phylogenetic analyses:** Pairwise distance matrices between populations were calculated using microsatellite frequencies. Three measures of distance,  $D^2$ ,  $R_{ST}$ , and  $(\delta\mu)^2$ , were used, each sensitive to different underlying models of evolution. However, all three measures were highly correlated ( $r=0.92, 0.91$ , and  $0.78$  for the  $R_{ST}-(\delta\mu)^2$ ,  $(\delta\mu)^2 - D^2$ . and  $R_{ST} - D^2$  comparisons, respectively).

The distance measure  $D^2$  is based on the Reynolds coancestry coefficient (S11), often referred to as  $\theta_W$ , and is an estimator of  $F_{ST}$ . It is based on a model in which genetic drift is the only force influencing allele frequency differences across populations (S11). In cases where microsatellite alleles do not follow a stepwise mutation process, or where genetic drift and/or gene flow have stronger influence on shaping diversity than mutation, this distance measure gives more reliable phylogenetic results as compared to  $R_{ST}$  and  $(\delta\mu)^2$  (S12, S13).  $D^2$  genetic distances were estimated using PHYLIP (PHYLIP version 3.6 (S14) software package). The equation below for  $D^2$  given in the PHYLIP documentation is derived from (S11).

$$D^2 = \frac{\sum_m \sum_i (p_{1mi} - p_{2mi})^2}{2 \sum_m [1 - \sum_i p_{1mi} p_{2mi}]}$$

where  $m$  is summed over loci,  $i$  over alleles at the  $m$ -th locus, and where  $p_{1mi}$  is the frequency of the  $i$ -th allele at the  $m$ -th locus in population 1.

$R_{ST}$  is an analogue to  $F_{ST}$  for microsatellite data, and is based on the assumptions of the stepwise mutation model (S15). For equal sample sizes (and equal weighting among loci)  $R_{ST}$  can be calculated as,

$$R_{ST} = \frac{\bar{S} - S_W}{\bar{S}},$$

where  $\bar{S}$  is twice the repeat unit variance across populations and  $S_W$  is twice the repeat unit variance within populations (S15). Weighting was used so that each population sample contributed equally to  $\bar{S}$  despite unequal sample sizes (S15).

$(\delta\mu)^2$  (S16) was developed specifically for microsatellite markers, and, like  $R_{ST}$ , assumes a stepwise mutation model (S16). This measure works best for phylogenetic reconstruction when taxa have been separated for long time periods and is expected to be linear with time (S16).

$$(\delta\mu)^2 = (m_x - m_y)^2$$

where  $m_x$  and  $m_y$  are the mean allele sizes in populations x and y, respectively. Data for multiple loci are combined by averaging the single-locus values of  $(\delta\mu)^2$ .

Allele frequency datasets were re-sampled 1000 times to generate multiple distance matrices. Unrooted neighbor-joining trees were constructed from these matrices using *neighbor* (PHYLIP version 3.6 software package) (S14). For the  $D^2$  analysis, a consensus tree, obtained using *consense* (PHYLIP), was used as an input for *contml* (PHYLIP) to generate branch lengths from allele frequency data using a maximum likelihood algorithm. Nodes that were supported by bootstrap values of at least 70% were labeled. For the  $R_{ST}$  and  $(\delta\mu)^2$  trees, a single tree from *neighbor* was generated with branch lengths, and the bootstrap values, calculated using *consense*, were placed on that tree. The nodes supported by bootstrap values of at least 50% were labeled.

The topology of inferred trees depends upon the genetic distance measures used that are based on different evolutionary models. These models differ in regard to sensitivity to evolutionary forces such as mutation, genetic drift, and migration. For example, when gene flow is reduced, the effect of mutation may become an important factor in population differentiation, whereas when levels of gene flow are high,  $F_{ST}$  models may outperform distance measures based on stepwise mutation models (S13). Both the  $R_{ST}$  and  $(\delta\mu)^2$  measures assume that mutation is an important factor in population differentiation and, therefore, may be more informative for detecting relationships between older, geographically isolated populations. However, there may be deviations from a stepwise mutation model for some microsatellite loci. Additionally, even when the strictest conditions of the stepwise mutation model are met,  $R_{ST}$  and  $(\delta\mu)^2$  have higher variances than  $F_{ST}$  measures (although the variance is less for large numbers of loci), resulting in low bootstrap values for phylogenetic analyses of closely related taxa (S12, S16, S17).

Trees were plotted with TreeViewX (S18). All trees were built as unrooted but the San population is displayed as an outgroup in the  $D^2$  and  $R_{ST}$  trees for ease of visualization; prior studies have indicated that they branch from the root of the human phylogenetic tree (S19-22).

**Estimates of genetic diversity from the average microsatellite repeat unit length variance:** Theta was estimated as twice the variance in repeat length units,  $\theta = 2\sigma^2$ , (under a stepwise mutation model) (S23). Prior to analyses GATA repeats were excluded due to possible effects of ascertainment bias, discussed above.

**Heterozygosity:** The expected heterozygosity was computed from the microsatellites with the GDA software (S24), with the sample-size corrected estimator, as in (S25). From Ohta and Kimura (S26), under a stepwise model, the expected relationship between  $\theta$  and heterozygosity ( $H$ ) is

$$H = 1 - \frac{1}{\sqrt{1 + 2\theta}},$$

which rearranges to

$$\theta = \frac{1}{2} \left( \frac{1}{(H - 1)^2} - 1 \right).$$

For autosomal loci in an ideal population,  $\theta$  is defined as  $\theta = 4N_e\mu$ , where  $N_e$  is defined as the effective population size and  $\mu$  is the per generation mutation rate. Prior to analyses GATA repeats were excluded due to possible effects of ascertainment bias, discussed above.

**Estimates of shared and private alleles:** The ADZE software (S27) was used to estimate the number of private and shared alleles within and between populations and geographic regions. The ADZE software implements a rarefaction approach for counting alleles private to combinations of populations by evaluating the number of alleles found in each of a set of populations but absent in all remaining populations, considering equal-sized subsamples from each population (S27).

**Analysis of Molecular Variance (AMOVA) :** Variance components were estimated for the 848 microsatellites, as in equation 5.3 from (S28), with GDA (S24), with 95% confidence intervals created on the basis of 1000 bootstraps across loci.

**Mapping population geographic coordinates:** Approximate coordinates of the traditional range for each ethnic group were determined from Ethnologue's language maps (S29) or as reported previously for the CEPH diversity panel and Indian datasets (S6, S30, S31). The average latitude and longitude was used when a range of coordinates was given for a single population or for samples composed of a few individuals from different neighboring populations. For data from previously published population samples, the reported geographic coordinates were used (S30, S31). A complete listing of coordinates can be found in **Table S1**.

**Serial founder effect analysis:** The geographic origin of modern humans and the route of migration out of Africa south of the Sahara to northern Africa and Eurasia were estimated from the data under a serial founder effect model (S31). This inference was created on the basis of the geographic position of sampled populations and estimated

levels of genetic diversity for each population ( $\theta$  estimated from the average microsatellite repeat unit length variance). Under this model, the highest levels of modern genetic variation are expected to occur in the geographic region of origin of modern humans. As modern human populations migrated away from this point, founder effects steadily reduced levels of genetic diversity with geographic distance (S31). Thus, the point of origin is predicted to have the most negative correlation ( $r$ ) between genetic diversity and distance from the origin, *i.e.* diversity decreases with distance from this point, yielding a negative slope. A grid of all points of origin was evaluated and the resulting correlation between diversity and great circle distance (*i.e.* along the curvature of the earth) from these points was plotted. Furthermore, rather than fixing a single waypoint of migration for populations in Northern Africa and Eurasia [*cf.* (S31)], this point was also varied over a grid, simultaneously with the point of origin, and the best fit (according to a least squares linear regression) was found.

The grid of potential points of origin, excluding Oceania and the Americas, was evaluated, and the resulting correlation ( $r$ ) between diversity and great circle distance (*i.e.* along the curvature of the earth) from these points was plotted (Fig. S30). The portion of the globe encompassing Africa and Eurasia (-40 to 70 degrees latitude, and -22.5 to 187.5 degrees longitude) was divided into a grid with units of 2.5 degrees, creating a 45x85 grid with 3,825 total points. However, because Oceania and the oceans were excluded as possible points of origin or waypoints out of Africa, only 1,495 grid points were plotted. 10,000 bootstrap replicates were created where populations were randomly re-sampled, with replacement, from the full set of sampled populations (thus, some populations were included more than once and some not at all in individual bootstrap replicates) and the procedure was repeated for each bootstrap replicate. This procedure was used to determine the geographic confidence region for both the origin and the waypoint (Fig. S31). The points with the best fit in each replicate were chosen as the origin and waypoint.

Also, within this serial founder effect framework, the predicted regional levels of expected genetic variation were estimated (Fig. S2C). To do this, we used a linear regression weighted by geographic distance away from each point of evaluation (*i.e.* nearby levels of variation contribute more to the correlation than points further away) and solved for the intercept (*i.e.* the predicted level of variation at that point, where distance is equal to zero, on the basis of the relationship between genetic variation and distance away from each point).

**TESS analysis:** The genetic clustering of individuals in the presence of a spatial geographic network was inferred with TESS (S32). Because only a single geographic point is used for each population, the individuals within a population were randomly assigned geographic positions over a narrow range,  $\pm 0.1$  degree N-S and E-W, centered on the population value (this avoids identical geographic placements that can obscure heterogeneous clustering results within population samples). The no-admixture model was used and the interaction parameter was set to one,  $\psi=1$  (lower values for this parameter result in the identification of additional clusters). The maximum number of clusters was set to  $K=10$  (of which the program estimated the presence of  $K=6$  clusters). Five primary run sets of five runs each (25 total primary runs) were run for 2,000 steps, then each of the five sets were extended in a single secondary run (five total secondary

runs) of 2,000 steps starting from the highest likelihood endpoint of the five primary runs in each set. Finally, the highest likelihood result at the end of these five secondary runs was chosen to display the resulting geographic clustering pattern.

**Principal Components Analysis:** The EIGENSOFT software package (S9, S33) was used for individual principal components analyses. *Smartpca* (of the EIGENSOFT package) was recompiled and the makefile edited to substitute a gfortran library call for the f2c library call. The microsatellite data was converted into a false SNP format by scoring the presence or absence of each of  $n-1$  alleles (where  $n$  is the number of alleles in the sample). The in/del data were converted to a binary coding for the presence or absence of a reference allele.

**Unsupervised STRUCTURE analysis:** Population structure was inferred with a Bayesian clustering approach implemented in the STRUCTURE software package (S34, S35). This program identifies groups of individuals with similar allele frequency profiles (S35). This clustering approach avoids *a priori* population classifications, instead estimating the shared population ancestry of individuals based solely on their genotypes under an assumption of Hardy-Weinberg equilibrium and linkage equilibrium in ancestral populations. It infers individual proportions of ancestry from  $K$  clusters, where  $K$  is specified in advance and corresponds to the number of posited ancestral populations and can be varied across independent runs. Individuals can be assigned admixture estimates from multiple ancestral populations, with the admixture estimates summing to 1 across these population clusters (S36).

STRUCTURE Version 2.2.3 was used for unsupervised STRUCTURE runs assuming the  $F$  model of correlated allele frequencies among the ancestral clusters (S37) with a 20,000 step burn-in and 10,000 step chain, with a separate  $\alpha$  estimated for each population (POPALPHAS = 1). The latter allows for asymmetric patterns of admixture amongst the inferred populations.

We analyzed the global dataset, the African dataset, and African regional data subsets separately with an unsupervised STRUCTURE analysis. 25 replicates were run for each  $K$  (number of ancestral clusters assumed) and each dataset. We ran up to  $K = 15$  for the global, African, and East African datasets,  $K = 10$  for the Middle African and Western African datasets, and  $K = 5$  for the Saharan African and South African datasets. The structure outputs were processed with CLUMPP (S38) and a G-statistic greater than 90% was used to assign groups of runs to a common clustering pattern. The maximum  $K$  value was determined on the basis of: (1) the  $K$  value at which the likelihood distribution reached a maximum and began to plateau or decrease; (2) high stability of clustering patterns between runs (the primary mode was observed in at least 60% of the 25 runs) and; (3) from the  $K_{max}$  value at which  $K_{max} + 1$  no longer refines the clusters (i.e.  $K_{max} + 1$  no longer splits the cluster distinguished at  $K_{max}$ ). The run with the highest likelihood of the data given the parameter values for the predominant clustering pattern (i.e. the mode) at each  $K$  was used for plotting with DISTRUCT (S4, S39).

**Supervised STRUCTURE analysis:** With STRUCTURE Version 2.2.3 (S34), individuals from populations having a high frequency of distinct ancestral clusters inferred with the unsupervised structure analyses (Papua New Guineans, Pima Native

Americans, Han Chinese, French, Indian, Iraqw, Hadza, Baka Pygmies, San, Dinka, Fulani, Mandinka, Mada, Lemande) were used as 14 training populations and a supervised analysis was performed in order to determine membership coefficients in the African Americans and Cape Mixed Ancestry individuals. For this analysis, we included both Bantu (Lemande) and non-Bantu (Mandinka) Niger-Kordofanian populations with highest frequencies of distinct ancestral clusters on the basis of the unsupervised STRUCTURE analysis of western Africa (**Fig. S26**). Ten replicates were done which gave similar results and the mean of these replicates was used for plotting (**Fig. S34**).

**NJ tree inferred from inferred ancestral clusters in STRUCTURE:** Unrooted NJ trees were constructed with *Phylip* software version 3.66 (*S14*) from the average pairwise nucleotide distance between ancestral clusters (*S37*).

**Geographic vs genetic distance analyses:** Analyses were performed to assess the relationship between geographic distance and genetic differences at multiple scales: within major global regions and within Africa. Great circle geographic distances were calculated with the Haversine method, as described (*S31*). Prior to analyses,  $(\delta\mu)^2$  genetic distances were tested for normality, with the Shapiro Wilkes test (*S40*). All populations deviated from normality ( $p \leq 0.01$ ) except the Middle Eastern ( $p=0.26$ ) and European (0.06) populations. Because of the highly significant deviation from normality in all other populations, correlation analysis was done, with the non-parametric Spearman's Rho test, which was calculated at the following levels: all Africa, Middle East, Central Asia, East Asia, India, and Europe. Within Africa regions were divided into Eastern Africa, Southern Africa, Central Africa, Saharan Africa, and Western Africa. To test for heterogeneity of Spearman's Rho, Fisher *r*-to-*z* transformations of the Spearman correlation coefficients was performed (*S41*). All analyses were performed with SAS software (*S42*).

**Genetic/linguistic diversity correlations:** In a historical linguistic classification, languages are attributed to particular clades and subclades in a language family on the basis of their common possession of particular linguistic 'mutations,' i.e., unique innovations in lexicon, lexical meanings, phonology, and grammar. Such shared innovations are analogous to genetic mutations, in that they attest to the descent of the languages in question from earlier single ancestral languages, in which the innovations ('mutations') took place. In every case this kind of evidence forms the primary basis for constructing the family trees of the African language families (**Fig S32**). Where the evidence is extensive, complex and detailed trees of successive language divergences can be constructed, as the case of the Nilo-Saharan family illustrates (**Fig. S32H**) (*S43*). For Afroasiatic, an outline presentation of the innovations on which its primary branchings are based can be found in (*S44*). A variety of other sources present the testimony of linguistic innovation for the internal subgrouping of the Chadic branch (*S45*), the Omotic branch (*S46*), and the Cushitic branch (*S47*, *S48*), along with its Eastern Cushitic (*S49*) and Southern Cushitic (*S50*) subclades. For the classification of Niger-Kordofanian into its major clades and subclades, the work of Williamson and Blench (*S51*) has been followed. A detailed Bantu subclassification based on phonological, pronominal, and



lexical innovations, combining the findings of a number of scholars, can be accessed at (S52).

The language distance measures in this study rest on a different kind of evidence, lexicostatistics. Its results turn out to be generally congruent with the evidence of lexical, phonological, and grammatical innovation. The data come from a large number of sources—for Bantu (S53), non-Bantu Niger-Kordofanian subclades (S54-59), Nilo-Saharan (S46, S60-66), Afroasiatic (S46, S50, S67, S68), and Khoesan (S69, S70) (see also (S52)). The values indicated at each node in the language relationship trees are calculated medians of the distributions of attested pairwise percentages of cognation for languages whose ancestral forms diverged from each other at the particular node.

Divergence times between related languages were estimated with archeological dates and glottochronological methods (S71, S72). However, these age estimates were not used for the correlations with genetic distance. Rather, levels of shared cognates between population pairs were used to infer linguistic similarities (scaled from 0-1; **Fig. S32**). The relationship between linguistic distance (1- language similarity) and genetic distances ( $(\delta\mu)^2$ ) was then analyzed within language families. We restricted our analyses to within language families because of the more rapid decay of linguistic as compared to genetic similarities. The sampled Pygmy populations, which speak Niger-Kordofanian languages today, are a well known case of recent language replacement. This, taken together with the Pygmies genetic dissimilarity to other Niger-Kordofanian populations, led us to analyze the pairs within the Niger-Kordofanian family with and without the Pygmies. Differences between results can be used to infer the relationship between language and genetic distance in Pygmy populations relative to other NK populations.

Regression analyses were performed with  $(\delta\mu)^2$  as the dependent variable and language distance (1- the similarity index) and geographic distance as independent variables, with SAS (Version 9.1). Since language distances were not normally distributed (Shapiro Wilks test,  $p < 0.001$ ) the language variables were transformed with an inverse transformation (1/language distance). Regression analyses were performed on the transformed variable and then adjusted for geographic distance. In addition, an interaction term (language similarity X geographic distance) was added to the model and tested for significance. A regression of  $(\delta\mu)^2$  on geographic distance was also analyzed and adjusted for language. The reduced models were: genetic distance  $((\delta\mu)^2) = \mu + \alpha$  (language similarity) +  $\varepsilon$  and genetic distance =  $\mu + \beta$ (geographic distance) +  $\varepsilon$ . The full model was: genetic distance =  $\mu + \beta$ (geographic distance) +  $\alpha$  (language similarity) +  $\varepsilon$ . The full model was analyzed with and without an interaction term. Only within language family comparisons were performed. These included the AA, NS, and NK with and without Pygmies. Adjustment for the second dependent variable is only possible when the two variables are not co-linear. This was examined, and was not an issue for the analyses performed with the exception of the Cushitic speakers (see below).

**Statistical significance:** Unless otherwise noted, we considered a statistic significant if the p-value for the test was less than or equal to 0.05.

## SUPPLEMENTARY TEXT

### African language classification

There are over 2,000 distinct ethno-linguistic groups in Africa, speaking nearly a third of the world's languages (*S29*). Except for a few unallocated languages, the languages of Africa have been classified into four macro-families: Niger-Kordofanian, Afroasiatic, Nilo-Saharan, and Khoesan. Here we use the spelling of Afroasiatic as originally defined by Joseph Greenberg in the 1950s (*S73*) rather than the derivative "Afro-Asiatic" spelling. Of the four African language families, Niger-Kordofanian is the most wide-spread. Its languages are spoken across half of Africa. Some of the West African Niger-Kordofanians sampled in our study belonged to urbanized societies, with centralized political structures, social stratification, and elaborate ritual institutions, and were historically involved in complex systems of long-distance trade (e.g. the Yoruba and other southern Nigerians, as well as the Asante and Brong, for the past 1,500 years, and the Malinke (Mende) and their ancestors since 3,500-3,000 ya). Many of the Niger-Kordofanians of Central and southeastern Africa sampled in this study belonged to chiefdom-size polities since 1,500-1,000 ya, but others, most notably the Kongo, formed powerful kingdoms with widespread trade connections across the Congo basin (*S74*).

The Afroasiatic family includes a great variety of societies. Many Chadic peoples of West Africa lived in chiefdom-sized agricultural communities, but the Hausa in particular for the past 1,000 years have formed an urbanized society with cities of up to 50,000 inhabitants, engaged in manufacture and widespread commercial activities. The Amazigh-speaking Mzab of the Sahara formed a commercial enclave with similarly widespread commercial relations. Many of the Cushitic populations, in contrast, were organized into village-scale farming or agro-pastoral communities; others such as the Beja pastoralists and Oromo mixed farmers formed alliances of up to several thousand people, on the basis of either clan confederacies or on age-grade institutions of governance (*S74*). This language family also includes the ancient Egyptians and one group, the Semites, who reside in northern Africa and the Middle East (*S75*).

The Nilo-Saharan family extends across another wide expanse of Africa, from the Songay of Mali in the west to the Nilotes of southern Sudan and Eastern Africa. The Central Sudanic groups of the Chad Basin formed both chiefdoms and kingdoms in recent centuries, while the Kanuri and Kanembu over the past 1,000 years belonged to powerful kingdoms with wide-reaching commercial connections. States as early as 3,500 BC along the Nubian Nile also spoke Nilo-Saharan languages (*S67*, *S74*). In contrast, the Nilotic peoples often belonged to large alliances, clan-based as among the Dinka and Nuer of southern Sudan or from age-grade institutions as among the Maasai of East Africa (*S74*).

The fourth family, Khoesan, is highly unusual in being composed today primarily of residual hunter-gatherer populations (e.g. San, !Xun/Khoe, Hadza, Sandawe), with only the Sandawe being recently established farmers and herders, albeit with strong ideological attachments to hunting remaining (*S76*). However, it should be noted that the classification of Hadza and Sandawe as Khoesan is a contentious issue (*S77*) since they are highly divergent from each other and from SAK languages. Linguistic data indicates that the Hadza language, in particular, is especially divergent from, or perhaps unrelated to, other Khoesan languages (*S78*, *S79*).

### **African classification by subsistence mode**

African populations were classified based on subsistence modes historically practiced by the ethnic populations listed in **Table S1**. These include populations that practice a diverse and complex array of subsistence modes, including animal domestication (herding), plant cultivation (farming), plant cultivation and herding (mixed farming) and hunting and gathering. Although the majority of the newly collected African samples included in this study originated from individuals living in rural populations that continue to practice farming- or herding-based economies, some of the populations (e.g. Mende, Xhosa, Yoruba, among others) include individuals living in cities who no longer engage in farming or herding practices. African non-forager populations include the numerous stratified, commercially active, and politically centralized societies, as well as the up-till-recently large clan- or age-grade-based societies and the smaller village-scale societies.

### **Comparison of genetic diversity ( $\theta$ ) inferred from microsatellite variance versus heterozygosity**

Estimates of genetic diversity ( $\theta=4N_e\mu$ ) from the sample variance in repeat length of the microsatellite alleles compared to ( $\theta$ ) on the basis of heterozygosity are shown in **Fig. S2**. The correlation between variance and heterozygosity estimates ( $R^2 = 0.927$ ,  $p = 1.19 \times 10^{-104}$ ) is shown in **Fig. S4**. Three African hunter-gatherer populations are included in the five populations with highest measured levels of genetic diversity on the basis of variance of microsatellite allele length; the Baka and Bakola Pygmies from Cameroon and the San from Namibia (the other two populations with highest diversity are the Ntumu from Cameroon and the Burunge from Tanzania) (**Fig. S2A**). In contrast, the five populations with highest diversity from heterozygosity estimates are the Burunge, Turu, Gogo, and Sukuma from Tanzania (all agriculturalist or agro-pastoralist populations), and the African Americans from Baltimore (**Fig. S2B**). The San and the Hadza hunter-gatherers are amongst the African populations with lowest levels of heterozygosity.

Prior studies from simulations as well as empirical data have indicated that the ratio of  $\theta$  inferred from variance relative to  $\theta$  inferred from heterozygosity can be informative for inferring past population expansion and bottleneck events (*S80*, *S81*). Specifically, a population bottleneck followed by population expansion causes an imbalance between estimates of  $\theta$  with allele size variance and those with heterozygosity (*S80*), because the variance estimate is transiently higher than expected under equilibrium conditions, resulting in the variance  $\theta$  to heterozygosity  $\theta$  ratio being greater than one. By contrast, populations which have recently expanded in the absence of a strong bottleneck event exhibit ratios of variance to heterozygosity less than one. This is because after expansion, both variance and heterozygosity increase as the population approaches a new mutation-drift equilibrium. If the expansion is sufficiently recent with mutation events largely restricted to the post expansion period and distributed among many lineages, the initial effect is to increase heterozygosity from new mutations more than allele size variance, since the latter quantity is more sensitive to mutations that distinguish the oldest lineages and requires more mutational events to recover (*S81*). As a result, heterozygosity approaches its new limit value faster than genetic variance (*S81*).

The ratios of  $\theta$  inferred from variance and heterozygosity for the current dataset are shown in **Fig. S3**. The ratio of variance and heterozygosity is the largest in Native

American populations, followed by Oceanic and East Asian populations, all with values greater than one, intermediate in most European, Middle Eastern, and Indian populations, with values near one, and with values less than one in most African populations and a few Middle Eastern and European populations. This observation is consistent with previous findings, suggesting a strong bottleneck followed by a recent and rapid expansion in Native Americans and Australo-Melanesians, and expansion but lack of a recent strong bottleneck in Africans (S80, S82). Interestingly, the San and the Hadza hunter-gatherers have the highest ratio of variance relative to heterozygosity among almost all African populations, with a ratio value slightly greater than 1.0 (Fig. S3). The only African population with a larger ratio is the Dogon. The Hadza and San are also apparent outliers in the plot of  $\theta$  inferred from heterozygosity shown in Fig. S2B. These results are consistent with relatively stable small population sizes in these hunter-gatherer populations, although simulations will be required to obtain detailed demographic parameter values.

### Comparison of Phylogenetic Trees

Three measures of genetic distance were used, each based on and sensitive to different underlying models of evolution (see methods). The  $D^2$  genetic distance assumes that population differentiation is due to genetic drift (S11). Therefore, this measure is most sensitive to recent differentiation events, such as among the Niger-Kordofanian speaking populations (Fig. 1).  $R_{ST}$  is similar to  $F_{ST}$ , but is based on the fraction of the total variance in allele size between subpopulations, assuming a stepwise mutation model (S15).  $(\delta\mu)^2$  is based on differences in the means of microsatellite allele sizes, also assuming a stepwise mutation model (S16). Therefore, both  $R_{ST}$  and  $(\delta\mu)^2$  may be more sensitive to older differentiation events, where mutation is expected to play a large role. It is interesting to compare the results of the phylogenetic analyses using these three genetic distance measures. As expected, the tree constructed from  $D^2$  (Fig. 1) shows clustering of closely related Niger-Kordofanian speaking populations (e.g. the two Yoruba populations from Nigeria and the two Tikar populations from Cameroon). In this tree, the Pygmies cluster near the SAK, with the Mbuti appearing closest to the SAK, consistent with the STRUCTURE, TESS, and PCA results (Figs. 2, 3, 4, 5). In the  $D^2$  neighbor-joining tree (Fig. 1), the Hadza and Sandawe populations cluster near the neighboring East African populations with whom they have admixed. By contrast, in the  $R_{ST}$  tree (Fig. S7), the Hadza and Sandawe populations cluster near the SAK, close to other East African populations. In both the  $R_{ST}$  and  $(\delta\mu)^2$  trees (Figs. S7 and S8), the Pygmies cluster closest to the Niger-Kordofanian Bantu-speaking populations with whom they have admixed. The clustering of the SAK with the Hadza/Sandawe in the  $R_{ST}$  tree, and the clustering of the SAK with the Pygmies in the  $D^2$  tree may indicate that these population differentiation events are quite old, and that patterns of population relationships have been influenced by subsequent demographic events, including admixture with local populations. Additionally, these patterns may reflect ancient admixture events between the ancestors of the SAK (whose distribution may have extended as far north as Ethiopia (S83-87)) and the ancestors of the Hadza, Sandawe, and Pygmies, whose geographic ranges may have overlapped. The genetic similarity between the SAK and Pygmies, as indicated in the TESS and PCA analyses (Figs. 2, 5A), and at high K values in the STRUCTURE analyses (Figs. 3, 4, 5B, 5C, S15), raises the

possibility that the SAK and Pygmies (particularly the Mbuti) may share more recent common ancestry and/or gene flow.

### **Details of global STRUCTURE results**

When two clusters are assumed in the STRUCTURE analysis ( $K = 2$ ) (**Fig. 3**), individuals can primarily be assigned to African (orange) or non-African (blue) clusters, consistent with the PCA (**Fig. 2A**). Individuals from Saharan and Eastern Africa show heterogeneous ancestry, reflecting descent from populations ancestral to non-Africans and/or gene flow from non-Africans into Africa. We also find evidence for low levels of African ancestry in several Middle Eastern and Oceanic populations. The latter observation is consistent with possible gene flow into these regions and with studies based on archeological and genetic data, indicating an early migration event of modern humans out of Africa, across southern Asia, and into Oceania (*S36, S88*). With three clusters ( $K = 3$ ), the East Asian, Oceanic and Native American individuals become distinguished (pink) (with individuals from South and Central Asia showing heterogeneous ancestry), again consistent with the PCA. With a fourth cluster ( $K = 4$ ), many Eastern African populations (purple), particularly the Hadza and Afroasiatic speakers, are distinguishable from other African populations. At  $K = 4$ , the Middle Eastern and Oceanic populations both show evidence for low levels of Eastern African ancestry. The fifth cluster ( $K = 5$ ) distinguishes the Hadza hunter-gatherer population (yellow), consistent with PCA (**Fig. 2**), and to a lesser extent the Pygmy and SAK hunter-gatherer and the Sandawe (former hunter-gatherer) populations. The sixth cluster ( $K = 6$ ), distinguishes the western Pygmies (dark green). The seventh cluster ( $K = 7$ ) distinguishes African individuals who speak Chadic (a western Afroasiatic sub-family) and/or Nilo-Saharan languages (red). The eighth cluster ( $K = 8$ ) distinguishes the Indian individuals (dark pink) and the Oceanic populations, consistent with possible shared ancestry of these populations. The ninth cluster ( $K = 9$ ) distinguishes the Oceanic individuals (light green). The tenth cluster ( $K = 10$ ) distinguishes the Native American individuals (dark purple). The eleventh cluster ( $K = 11$ ) distinguishes the Mbuti Pygmy and SAK individuals (light green), indicating shared common ancestry of these geographically distant hunter-gatherer populations. At  $K = 12$ , the Chadic and Nilo-Saharan speaking populations originating from northern Cameroon, Chad, and southern Sudan, become distinct (maroon). The thirteenth cluster ( $K = 13$ ) distinguishes the Sandawe from Tanzania (brown) (former hunter-gatherers who adopted mixed farming an uncertain number of centuries ago) and the fourteenth cluster ( $K = 14$ ) distinguishes the nomadic pastoral Fulani populations (fuchsia). Several of the African populations (the CMA, Fulani, and eastern Afroasiatic-speakers) show low to moderate levels of the European/Middle Eastern cluster, consistent with possible gene flow from those regions. At  $K = 10-14$ , the non-African pattern essentially recaptures the results of prior studies of the CEPH-HGDP (*S4-6, S20, S89*) in which individuals cluster by major geographic regions. However, our data reveal considerably more substructure among Africans (nine at  $K = 14$ ) than previously observed (*S4-6, S20, S89*).

Allele frequencies from inferred ancestral clusters derived from the STRUCTURE analysis at  $K = 14$  were used to construct an un-rooted neighbor-joining tree (**Fig. S14**). African and non-African Associated Ancestral Clusters (AACs; labeled based on the populations showing the highest levels of ancestry for each inferred

ancestral cluster) are highly divergent. The Oceanic AAC is the branch closest to the African AACs, followed by a clade formed by the European and Indian AACs, and finally a clade formed by the Asian and Native American AACs. Within Africa, the Pygmy and SAK AACs form a clade, as do the Hadza and Sandawe AACs, and the Nilo-Saharan and Chadic AACs. The Fulani and Cushitic (an eastern Afroasiatic subfamily) AACs, which likely reflect Saharan African and East African ancestry, respectively, are closest to the non-African AACs, consistent with an East African migration of modern humans out of Africa or a back-migration of non-Africans into Saharan and Eastern Africa.

### **Genetic variation within Africa**

The proportion of variation among African populations classified based on geographic, linguistic, and subsistence classification was determined based on AMOVA analysis of the microsatellite data. It should be noted that sampling design influences inferences of variance among populations. Indeed, the proportion of variation among African populations inferred from AMOVA analysis of the microsatellite data is 2.59% for the CEPH-HGDP African populations but is 1.71% in our expanded set of Africans (**Table S3**), likely due to an over-representation of relatively isolated hunter-gatherer populations in the CEPH-HGDP. Within Africa, southern Africa shows the highest level of among population variation (2.13%), presumably reflecting the highly divergent SAK populations. Hunter-gatherer populations in general had the highest levels of among population variance (3.18%). Populations that speak Khoesan languages, most of whom are (or until recently were) hunter-gatherers were relatively variable (3.39%). In contrast, African herding and farming populations had the lowest levels of among population variance (0.94% and 0.97%, respectively), possibly due to population expansions, assimilations, and long range migrations over the past ~5,000 years (*S90, S91*). Low levels of population variance were also observed among the Nilo-Saharan (1.13%) and Niger-Kordofanian (1.17%) language families, many of whom originated from herding and farming societies, respectively.

### **Details of Africa STRUCTURE results**

The Africa-wide STRUCTURE result (**Fig. S15**) largely recapitulates the African PCA results. Specifically, the western and eastern African populations were distinguishable at K=2, several hunter-gatherer (or former hunter-gatherer) populations at K=3 (the Hadza, SAK, and Pygmies, and to a lesser extent the Sandawe and neighboring Burunge with whom the Sandawe have admixed, shown in yellow), and the Hadza (yellow) are distinguished from the SAK and Pygmies (dark green) at K=4. As K increases, the following population clusters are sequentially distinguished: the Nilo-Saharan and Chadic speaking individuals (shown in red) from K=5 upward; individuals with some European or Middle Eastern ancestry, as inferred from the global STRUCTURE analysis, from K=6 upward (shown in blue, consisting of eastern African Afroasiatic and Nilo-Saharan speaking populations, the Fulani, and CMA population); the SAK and Mbuti Pygmies (shown in light green) are distinguished from the western Pygmies (dark green) at K=7 and higher; the Sandawe (shown in brown) from K=8 and higher; the Fulani (pink) at K=9 and higher; the Mbugu (who speak a Southern Cushitic language with extreme Bantu admixture (*S50, S92*), shown in dark purple) at K=10 and

higher; the Cushitic speaking populations of southern Ethiopian origin (Borana, Burji, Konso) and northern Kenya (Wata, Rendille and Gabra) at  $K = 11$  and  $13$  (light purple); at  $K = 14$ , Nilotic Nilo-Saharan speaking populations (i.e. Maasai, Dorobo, Sengwer, Saboat, Tugen, Samburu, Marakwet, Sengwer, Okiek, Nandi, Saboat, Turkana, Pokot; red) are distinguished from the Central Sudanic Nilo-Saharans (Laka, Ngambaye, Kaba, Bulala, Kenembou, Sara; tan), and Chadic-speaking populations (Mada, Ouldeme, Giziga, Mandara, Kotoko, Zulgo, Podokwo, Masa, Hausa) and Semitic-speaking Baggara (maroon). The Bantu speakers of South Africa (Xhosa, Venda), had high proportions of the SAK and western African Bantu AACs, and low levels of the East African Bantu AAC (the latter is also present in Bantu speakers from Democratic Republic of Congo and Rwanda). These results demonstrate, with nuclear genetic markers, evidence for two sources of migration (from the East and West) of Bantu speakers into southern Africa. These results are consistent with linguistic and archeological evidence, suggesting a distinct East African Bantu migration event into southern Africa from a core area west of Lake Victoria  $\sim 2,000$  ya (*S83*) and the incorporation of Khoekhoe ancestry into several of the Southeast-Bantu populations  $\sim 1,500 - 1,000$  ya. The incorporation of a major Khoekhoe demic component in the proto-Sotho and proto-Nguni societies of  $\sim 1,500 - 1,000$  ya in South Africa is demonstrated in both proto-languages by their separate borrowings of Khoekhoe loanword sets of the heavy intensive category (*S93*), a diagnostic marker of this kind of population history (*S94*).

### **Origins of Nilo-Saharan and Afroasiatic Cushitic speaking populations**

The southern/central Sudanese show high levels of both the Nilo-Saharan (red) and Afroasiatic Cushitic (purple) AACs from  $K = 8-13$  (**Fig S15**), consistent with linguistic arguments suggesting a long history of extensive contact and gene flow  $\sim 20,000 - 10,500$  ya, along the western edges of the Ethiopian highlands (*S95*). The history of regional interactions between Nilo-Saharans and Cushites  $5,000-1,000$  ya in southwestern Sudan and adjacent parts of Uganda and Kenya (*S62*) were likely to have reinforced the genetic patterns observed in the STRUCTURE analyses.

Our data support the hypothesis based on linguistic, archeological, mtDNA, and Y chromosome data, that the Sahel has been a corridor for bi-directional migration between eastern and western Africa (*S96-98*). We observe the highest proportion of the “Nilo-Saharan AAC” in the southern/central Sudanese populations (Nuer, Dinka, Shilluk, Nyimang), with decreasing frequency from northern Kenya (e.g. Pokot) to northern Tanzania (Datog, Maasai). From  $K = 5-13$ , all Nilo-Saharan speaking populations from Kenya, Tanzania, southern Sudan, and Chad cluster with west-central Afroasiatic Chadic speaking populations (**Fig. S15**). These results are consistent with linguistic and archeological data, suggesting a possible common ancestry of Nilo-Saharan speaking populations from an eastern Sudanese homeland within the past  $\sim 10,500$  years, with subsequent bi-directional migration westward to Lake Chad and southward into modern-day southern Sudan, and more recent migration eastward into Kenya and Tanzania  $\sim 3,000$  ya (giving rise to Southern Nilotic speakers) and westward into Chad  $\sim 2,500$  ya (giving rise to Central Sudanic speakers) (*S62, S65, S67, S74*). A proposed migration of proto-Chadic Afroasiatic speakers  $\sim 7,000$  ya from the central Sahara into the Lake Chad Basin may have caused many western Nilo-Saharans to shift to Chadic languages (*S99*). Our data suggest that this shift was not accompanied by large amounts of Afroasiatic

gene flow. Analyses of mtDNA provide evidence for divergence ~8,000 ya of a distinct mtDNA lineage present at high frequency in the Chadic populations and suggest an East African origin for most mtDNA lineages in these populations (*S100*).

### **Origins of the Fulani, Baggara Arabs, Koma, and Beja**

The Saharan African Beja (Sudan) and Mozabite (Algeria) populations show high levels of Middle Eastern/European and eastern African Cushitic AACs (**Figs. 3, 4, 5B, 5C**), suggesting possible gene flow from those regions and/or common ancestry. Linguistic evidence indicates that the Afroasiatic language family originated in the Horn of Africa (*S67, S75, S95*), consistent with high levels of the Afroasiatic AAC in the Beja populations (although the latter observation could also be due to reverse gene flow from the Middle East). When the Saharan African populations were analyzed separately, with STRUCTURE, the two Beja clan alliances (the Banuamir and the Hadandawa) were distinguished (**Fig. S22**).

Other groups of interest can be assessed with STRUCTURE analyses, including the Fulani, sampled from Nigeria and Cameroon, the Baggara sampled from northern Cameroon, and the Koma sampled from the Alantika Mountains in eastern Nigeria. The Fulani are nomadic pastoralists who speak a Niger-Kordofanian language (Atlantic Senegambian subfamily) and occupy a broad geographic range in central and western Africa. The Fulani show a number of morphological features that have led some anthropologists to suggest that they may have originated from East Africa or possibly Egypt or the Near East (*S101*). Mitochondrial DNA analysis indicates that Fulani have lineages of predominantly West African origin and that they cluster together and close to the Mandenka population from Senegal (*S101*). By contrast, Y chromosome analyses of Fulani sampled in the Sudan indicates shared ancestry with Nilo-Saharan and Afro-Asiatic speaking populations (*S97*). These results raise the possibility of differential patterns of male and female gene flow into this population. Our analysis, using genome-wide nuclear markers and STRUCTURE, indicates that the Fulani have distinctive ancestry (fuchsia) at  $K = 14$  in the global analysis (**Figs. 3, 4**) and at  $K = 9 - 14$  in the Africa analysis (**Fig. S15**). Low to moderate levels of the Fulani AAC was also observed in the Mozabite and Mandinka populations in the global analysis (**Figs. 3 and 4**). The Fulani cluster with the Chadic and Central Sudanic speaking populations at  $K \leq 13$  in the global analysis (**Fig. 3**; maroon) and at  $K \leq 8$  in the Africa analysis (**Fig. S15**; red). They also cluster near the Chadic and Central Sudanic speaking populations in the NJ tree based on population genetic distances (**Figs. 1, S7 and S8**). In the global STRUCTURE analysis, the Fulani show low to moderate levels of European/Middle Eastern ancestry (blue), consistent with mtDNA (*S101*) and Y chromosome (*S97*) analyses, as well as the presence at low frequency of the -13910T mutation associated with lactose tolerance in Europeans in this population (*S102*). Additionally, we observe moderate to high levels of Niger-Kordofanian ancestry in the Fulani populations (**Figs. 3, 4, S15; Tables S8, S9**). These results do not enable us to determine the definitive origin of the Fulani, although they indicate shared ancestry with Saharan and Central Sudanic populations and suggest that the Fulani have admixed with local populations, and possibly adopted a Niger-Kordofanian language, during their spread across central and western Africa. The origin of European (possibly via the Iberian peninsula) and/or Middle Eastern ancestry in the Fulani requires further exploration with additional genetic markers.



The Baggara (or Baggara Arabs or Shuwa Arabs) are nomadic pastoralists who speak an Afroasiatic Semitic language and inhabit regions ranging from southern Sudan to Nigeria. They are thought to be descendants of tribes originating from the Arabian Peninsula. More specifically, the Baggara trace their ancestry to the Banu Judham tribe of Yemen. This tribe was among the first tribes to settle in Egypt during the Muslim conquest in mid 7th Century AD (*S103*) and during the Shiite Fatimid dynasty (AD 909 to 1171). After the fall of Fatimid and rise of other subsequent dynasties such as the Ayyubid (1171-1250) and Mamluk Turk Sultans of Bahri (1250-1517), they are thought to have moved southwest and subsequently settled in present day Chad and then subsequently into northern Cameroon and Nigeria within the past 300 years. The earliest records of their existence in Chad are from the late 14<sup>th</sup> century, although they may have been there before then (*S104-108*).

Consistent with their proposed history of migration from Arabia across eastern Africa, southern Sudan, and the Sahel, the Baggara show low levels of Middle Eastern/European associated ancestry (blue) and high to moderate levels of Cushitic (purple) and Nilo-Saharan (red) associated ancestry in the global and African STRUCTURE analyses (**Fig. 3, 4, S15**). They also show ancestry from the Niger-Kordofanian, Fulani, and Chadic AACs (**Fig. 5B,C**), suggesting that they admixed with local populations as they migrated westward, consistent with studies of mtDNA(*S96*). These results are consistent with the phylogenetic trees of population genetic distances where they cluster near the Chadic and Central Sudanic-speaking populations (**Figs. 1, S7, and S8**).

The Koma, a population previously uncharacterized at the genetic level, who currently reside at high elevations in the Alantika mountain range bordering Nigeria and Cameroon, speak a Niger-Kordofanian language (sub-classified as Adamawa-Ubangi) and descend from populations that retreated into the mountains during the 18th century to take refuge during Fulani invasions (*S109*). In the D<sup>2</sup> phylogenetic tree (**Fig. 1**), they form a clade with Mbum from C.A.R. (who also speak an Adamawa-Ubangi language) and cluster near the Central Sudanic-speaking populations. In the African STRUCTURE analysis (**Figs. 5B, 5C, S15**), the Koma show predominantly Niger-Kordofanian ancestry at most K values, but at K = 14 they show moderate levels of shared ancestry with the Central Sudanic AAC (tan).

### **Population history of East Africa**

Here we characterize the genetic history of several eastern Africa populations whose origin was previously unknown. It is probable that the observed patterns from the STRUCTURE analyses are the result of hypothesized successive waves of migration into eastern Africa. The indigenous populations of East Africa are thought to be the click-speaking Hadza and Sandawe hunter-gatherers of Tanzania, whose populations may have originally extended from Kenya to Somalia and possibly into Ethiopia (*S50, S110*). The first wave of migration is thought to be by Southern Cushitic speakers (ancestral to the Iraqw, Gorowa (Fiome), Burunge, and Mbugu), moving south from Ethiopia into Kenya and then into Tanzania where they currently reside (*S84, S 85, S110, S111*). There are also two linguistically attested movements of Eastern Cushitic-speaking forager populations at ~4,000 and ~2,000 years, originating from a proposed homeland north of Lake Turkana into Kenya and Tanzania (Yaaku, El Molo) and four other movements originating from

southern Ethiopia and extending into northern Kenya (Rendille; Gabra, Borana, and Wata; Burji; and Konso) at successive periods from ~2,500 ya through the present (S62). Cushitic peoples since the proto-Cushitic period of ~10,000-9,000 kya practiced pastoralism, and at around 7,000 ya began to cultivate grain crops as well (S67). Generally accepted archaeological correlations show that the movement of the Southern Nilotes (e.g. Kalenjin, Okiek, Datog) south from the present-day Sudan/Ethiopia border region into western and central Kenya and subsequently into central northern Tanzania took place between ~2,900-2,400 kya (S62, S84, S111). These movements took place at approximately the same time as the settlement of the early Mashariki Bantu in the Lake Victoria and Lake Tanganyika Basins (S83). The Mashariki Bantu subsequently migrated out of these regions across eastern and southeastern Africa between ~2,300-1,700 kya (S83). Eastern Nilotes (e.g. Turkana, Samburu, Maasai) represent a more recent migration from southern Sudan, within the past ~1,500 - 500 years (S62, S84, S110, S111). These patterns of migration are expected to result in a highly diverse and complex genetic structure in East Africa compared to other regions, as we observe.

Within eastern Africa, including southern/central Sudan, clustering is primarily associated with language families, including Niger-Kordofanian (orange), Afroasiatic (purple), Nilo-Saharan (red) and two click-speaking hunter-gatherer groups: the Sandawe (brown) and Hadza (yellow) (**Fig. S19-S21**). However, individuals from the Afroasiatic Cushitic Iraqw and Gorowa (Fiome) and the Nilo-Saharan Datog (dark green), who are close geographically, also cluster. Additionally, several hunter-gatherer populations were distinct, including the Okiek (blue), Akie (pink), and Yaaku and El Molo (dark grey). Of particular interest is the common ancestry of the Akie (who have remnants of a Cushitic language) and the Eastern Cushitic El Molo and Yaaku at  $K = 9$ , consistent with linguistic data suggesting that these populations originated from southern Ethiopia and migrated into Kenya and Tanzania within the past ~4,000 years (S62, S91, S110). Note that possible cryptic relatedness (more distantly related than 3<sup>rd</sup> degree relatives) among the Hadza, whose census size is only 1,000, as well as genetic drift, could contribute to their genetic distinctiveness in the STRUCTURE and PCA analyses.

Our data also shed light on the history of particular eastern African populations. The Mbugu, who live in the Usambara mountain range in eastern Tanzania, speak a unique “mixed language” that contains Bantu syntax and Cushitic vocabulary (S50, S92). According to oral tradition, the original Mbugu homeland was in Lukupuya, which some scholars suggest might have been the Laikipia Plateau in Kenya, where many Maasai currently reside (S112). Their oral history further suggests that they have experienced conflict in the sixteenth and seventeenth centuries with neighboring Maasai, who allegedly stole their cattle, and with the neighboring Pare and Sambaa, with whom they eventually reached a peaceful accommodation (S112). It has been speculated that they maintained their indigenous language (which they call Ma’a) in order to maintain their cultural identity and distinction from neighboring societies (S112, S113). In our STRUCTURE analyses of Africa and East Africa (**Figs. 5B, 5C, S15, S16, S19**) the Mbugu form a distinct AAC (dark purple), but with moderate levels of the Niger-Kordofanian AAC, consistent with gene flow with neighboring Bantu populations. Additionally, we observe evidence for low levels of gene flow from the Mbugu into neighboring Bantu-speaking Pare and Sambaa populations (with whom they share language similarities (S50, S92). In the NJ tree of genetic distance between AACs from

the Africa STRUCTURE analysis (**Fig. S18**), the Mbugu AAC clusters together with the Fulani, Cushitic, and Saharan AACs, consistent with their proposed Cushitic origins. However, in the phylogenetic analyses, the Mbugu cluster near the Nilo-Saharan speaking populations (**Figs. 1, S7, S8**), perhaps reflecting historic admixture.

The genetic history of the Sandawe is described in the main text. Here we note that we see evidence of gene flow from the click-speaking Sandawe into the neighboring Cushitic speaking Burunge, and Bantu-speaking Turu (**Figs. 3, 4, 5B, 5C, S15, S16, S19**), consistent with language and technology exchange between these groups (S50, S91, S110).

### **History of East African hunter-gatherer populations**

In addition to the history of the Khoesan-speakers and Pygmies, our data also shed light on the population history of several other hunter-gatherer populations in Africa, whose subsistence is from hunting small game, foraging for roots and plants, and collecting honey. The term Dorobo (considered derogatory) is commonly used by Maasai populations to refer to hunter-gatherer populations who have “lost their cattle”. Here, we refer to these populations by their self-identified ethnicity, except in the case of a group of Dorobo who live near the Maasai in the Ngorongoro district of Tanzania and do not have a distinct ethnic affiliation. The Dorobo (Tanzania), Okiek (Kenya), and Akie (Tanzania) are foragers who live near the Maasai and speak the Maasai language, although the Okiek also speak several different Kalenjin Southern Nilotic languages of their own (*S114*) and the Akie, too, speak a Kalenjin language that contains loanwords from an extinct Rift Southern Cushitic language related to Burunge and Iraqw (*S110*). Some anthropologists have hypothesized that these populations are genetically Maasai who no longer raise cattle, while others argue that they are descendants of a more ancient group of East African foragers (*S111, S115*). Our data indicate that the Dorobo cluster near the Maasai in the phylogenetic analyses (**Figs. 1, S7 and S8**) and are not distinguishable from the Maasai on the basis of STRUCTURE analysis (**Figs. S15 and S19**). The Okiek cluster near the Maasai and other Nilo-Saharan-speaking populations in the phylogenetic trees (**Figs. 1, S7 and S8**) and are included in the Nilo-Saharan AAC from  $K = 2-7$  in the STRUCTURE analysis of East Africa (**Fig. S19**) but form a distinct AAC at  $K = 8$  and higher, suggesting that they share common ancestry with Nilo-Saharanans but have more recently become differentiated. Interestingly, they cluster with the Mbugu at  $K = 8$  (**Fig. S19**) perhaps, indicating Cushitic ancestry as well. Therefore, our data and analyses support the conclusion that the Dorobo and Okiek are genetically related to Nilo-Saharan speaking populations, and that they may have adopted a foraging subsistence pattern. However, additional analyses will be required to determine the time of divergence of the Okiek from the other Nilo-Saharan speaking (and possibly Cushitic) populations. Indeed, linguistic and archaeological evidence suggests that the Okiek have a significant degree of cultural continuity back to the Eburran hunter-gatherer populations of 12,000-2,000 kya in Kenya (*S83, S84, S110, S111*). It is possible that the Okiek differentiated from the other Nilo-Saharan speaking populations prior to the origins of cattle domestication within the past ~5,500 years in East Africa (*S116*).

In contrast, the Akie, who have a unique AAC at  $K = 10$  in the East Africa STRUCTURE analysis (**Fig. S19**), appear to share ancestry with neighboring Tanzanians at  $K = 2 - 8$  (**Fig. S19**), and share a distinct AAC at  $K = 9$  with the Eastern Cushitic El

Molo, who are fishermen on the eastern shore of Lake Turkana in Northern Kenya, and with the Eastern Cushitic Yaaku from southern Kenya, who historically were foragers for honey, plants, and small game (*S115, S117*). The El Molo and Yaaku form a distinct AAC at  $K = 10$  and we observe considerable asymmetric gene flow from the Yaaku into the neighboring Maasai (Maasai Mumonyot and Maasai Il'Ngwesi) and Samburu populations. Additionally, the Akie cluster close to Cushitic speaking populations, including the Yaaku, in the phylogenetic trees (**Figs. 1, S7, S8**), and interestingly, they cluster close to the Okiek in the  $D^2$  phylogenetic tree (**Fig. 1**). These results are consistent with linguistic and archeological data suggesting that the Akie, Yaaku, and El Molo were part of an early wave of Cushitic speaking populations into Kenya and Tanzania within the past 5,000 years (*S57*) who likely practiced a foraging subsistence pattern, and in the case of the Akie and Yaaku, more recently adopted a Nilo-Saharan language and/or culture (*S62, S84, S110, S111, S115, S118*), and admixed with Nilo-Saharans. The Yaaku in fact adopted the Maasai language only in the past 80 years (*S115, S117*). The Wata (also known as Boni) hunter-gathers from northern Kenya, are indistinguishable from neighboring Cushitic agro-pastoralist groups in the STRUCTURE analyses (**Figs S15, S19**), and cluster near the Cushitic speaking populations from northern Kenya and southern Ethiopia in the phylogenetic trees (**Figs. 1, S7, S8**), suggesting that they have recently adopted a hunting-gathering subsistence pattern, consistent with oral tradition. We do not find evidence of shared ancestry of any of the East African foraging groups with the indigenous Hadza and Sandawe populations of Tanzania, suggesting that other East African foraging groups were part of more recent migrations into the region.

### **Common origin of Pygmies and Khoesan-speakers**

Our observation that the Pygmies appear to share common ancestry with several Khoesan-speaking populations raises the possibility that the indigenous Pygmy language may have contained click consonants. A recent examination of the skeletal evidence for the development of the human vocal tract indicates that full human language capacity evolved before 50 kya but after 100 kya (*S119*). Considering that the normative directions of phonological evolution are from greater to lesser markedness, and that clicks are among the most marked of all sounds, the fact that click consonants exist at all in present-day languages favors their existence back to the earliest human languages of 100-50 kya. Some scholars have proposed that the language families of the world can be divided into two primary branches (*S120*). In this view a single extant language family, Khoesan, which preserves clicks, is the last representative of one primary branch; all the rest of the language families of the world descend from the second branch, the defining phonological development of which was the dropping of clicks from the consonant inventory (*S120*). Did the extinct language family or families of the Pygmies belong to the same primary branch as Khoesan? The apparent shared ancestry of Pygmies with several Khoesan speaking populations suggests that this is a possibility. It should be noted that some linguists have identified words associated with forest terms or with hunting that may be shared amongst diverse Pygmy populations and could potentially stem from an ancestral indigenous Pygmy language (*S121-123*). These words do not have click consonants. Future studies may be informative for reconstructing a proto-Pygmy language and for examining possible connections with modern Khoesan

languages. However, because of the limited time depth for resolving language phylogenies, it may not be possible to reconstruct such ancient linguistic affiliations.

Our observation of possible shared common ancestry amongst the SAK, Pygmies, and Hadza, who are all short statured, also raises the possibility that short stature may have been an ancestral trait rather than a recent adaptation in Pygmies to a tropical environment. Indeed, it is possible that the ancestors of these populations lived in a savannah environment, and that Pygmies migrated more recently into the tropical forest. However, it is also possible that short stature arose through convergent adaptation in these different populations. Future genome-wide genetic and phenotypic analyses will be informative for distinguishing the effects of local adaptation and genetic drift in these geographically diverse hunter-gatherer populations.

### **Gene-language and gene-geography associations**

Any consideration of the relationship of linguistic and genetic diversity must start with a major caveat. The spread of languages into new areas does indeed require the migration/movement of at least some speakers of the languages. But this number may range from a major movement of many individuals into a new region to only a few (*S124*). In addition, it is possible that language shift could occur without genetic exchange. One particular linguistic tool, the study of word borrowing patterns between two languages over a sustained period of time, may have particular utility in generating predictions about the relative proportions of the populations involved in histories of language shift (*S94*). The predictive capacities of this type of evidence have already received mention above with respect to the Khoekhoe demic components in South African Bantu-speaking societies (*S93*).

In most cases, we observed a strong correlation between genetic clustering and language classification, consistent with prior studies (*S124-S127*). However, we found several exceptions. In these cases, the word-borrowing histories show that the former language of the majority of the population typically did fit with the genetic clustering. For example, in the phylogenetic trees (**Figs. 1, S7, S8**), Afroasiatic speakers cluster into four primary groups, which correlate with geography; one group consists of Semitic-speaking and Berber-speaking populations in the Sahara, a second consists of Cushitic-speaking populations from southern Ethiopia/Northern Kenya, a third consists of Southern Cushitic-speaking populations from Kenya and Tanzania, and a fourth consists of Chadic-speaking populations from northern Cameroon and Chad. The Afroasiatic Chadic speaking populations from Northern Cameroon cluster close to the Nilo-Saharan-speaking populations from southern Sudan in the  $(\delta\mu)^2$  phylogenetic tree (**Fig. S7**) and close to the Central Sudanic speaking populations in the  $D^2$  and  $R_{ST}$  trees (**Figs. 1 and S8**) rather than with East African Afroasiatic speakers, consistent with STRUCTURE results (**Figs. 5B, 5C, S15**). These results are consistent with the linguistic evidence of notable Nilo-Saharan loanword sets in the Chadic languages of the types that imply a shift of former Nilo-Saharan-speaking populations to Chadic languages (*S99*). The Hausa, who speak a Chadic Afroasiatic language cluster with the Niger-Kordofanian speaking populations in the phylogenetic trees (**Figs. 1, S7, S8**), consistent with the high levels of the Niger-Kordofanian AACs observed in this population on the basis of STRUCTURE analysis (**Figs. 3, 4, 5B, 5C, S15, S24**) and in keeping with long-recognized linguistic evidence of Niger-Kordofanian influence on the Hausa, including

several salient loanwords, such as the word for meat (*S128*). The Dogon from Mali, who speak a Niger-Kordofanian language, cluster near the Saharan populations in the phylogenetic trees (**Figs. 1, S7, S8**), consistent with the results from STRUCTURE analysis, showing considerable Saharan (blue) ancestry, and consistent with oral history of a northern African origin (although it should be noted that the sample size for this population, 9 individuals, is very small and many markers did not amplify well) (**Figs. 5B and 5C; Table S9**). The linguistic evidence remains to be studied in this case.

Regression analyses of linguistic, geographic, and genetic distance are given in the main text. Here we note that co-linearity between geographic and linguistic distance could confound interpretation of results. Specifically, for the Cushitic only analyses we found that both linguistic distance and geographic distance explain a significant portion of the genetic variance (0.27 and 0.29, respectively;  $p < 0.0001$  for both). However, in the analysis that adjusts geographic distance for language the  $p$  value increases to 0.67, but language distance remains a significant factor after adjusting for geography. This result is consistent with the co-linearity of geography and language found in this group. In contrast, we did not find evidence for high levels of co-linearity in the other language families.

### **Genetic ancestry of African Americans**

Ancestry from multiple global populations was detected in both the African American and CMA populations. In contrast to prior studies of African American (*S129*) ancestry that focused on uniparentally inherited mtDNA or Y chromosome markers (*S129-131*), or on nuclear markers genotyped in a small subset of Africans (*S129, S132, S133*), the current study infers African American ancestry across the nuclear genome by comparison with 121 geographically and ethnically diverse African populations and an extensive sample of 60 non-African populations. In African American populations, from Chicago, Baltimore, Pittsburgh, and North Carolina, ancestry was predominantly from the African Niger-Kordofanian AAC (means 0.69-0.74), which is most common in western Africa, and the European/Middle Eastern AAC (means 0.11-0.15) (**Fig. 6 and Table S6**), consistent with prior studies (*S129-133*). This result is also consistent with the history of the slave trade, indicating that most slaves reached North America, often via the Caribbean, ultimately from the western coasts of Africa (*S134*). Low levels of ancestry from several additional populations were also detected (**Table S6**): Fulani (means 0.0 - 0.03, individual range 0.00-0.14), Cushitic East African (means 0.02, individual range 0.05 - 0.10), Sandawe East African (means 0.01- 0.03, individual range 0.00 - 0.12), East Asian (means 0.01 – 0.02, individual range 0.0 - 0.08), and Indian (means 0.04 – 0.06, individual range 0.01 -0.17). The Fulani are present across West Africa and, therefore, would be expected to have contributed to the slave trade, and the Cushitic and Sandawe ancestry could represent slave trade originating from the east coast of Africa (*S134*). It should be noted that the levels of Indian ancestry in African Americans may be slightly overestimated, and the levels of European ancestry slightly underestimated, due to moderate levels of the Indian AAC in European/Middle Eastern individuals (**Figs. 3 and 4**). We did not observe significant levels of Native American ancestry. However, other regions of the U.S., may reveal Native American Ancestry, as previously reported (*S133*). Finally, European and African ancestry levels varied considerably among individuals (**Fig. 6**).

### **Origins of the Cape Mixed Ancestry population**

Based on unsupervised STRUCTURE analysis, this population shows nearly equal high levels of southern African Khoesan (mean 0.25, individual range 0.01-0.48), Niger-Kordofanian (mean 0.19, individual range 0.01 - 0.71), Indian (mean 0.20, individual range 0.0 - 0.69), and European (mean 0.19, individual range 0.0 - 0.86) ancestry (**Fig. 6; Table S6**). The CMA population also has low levels of East Asian (mean 0.08, individual range 0.0 – 0.21) and Cushitic (mean 0.03, individual range 0.0 – 0.40) ancestry. These results are consistent with the history of the CMA population, which is thought to have descended from the indigenous Khoekhoe (Khoesan-speaking herders), and admixed initially with European Dutch “Afrikaaner” colonialists from 1652 up to the present as well as with Bantu-speaking slaves from West Africa and Mozambique, and with Austronesian-speaking slaves from Madagascar and Indonesia during the 18<sup>th</sup> and early 19<sup>th</sup> centuries (*S135, S136*). Additionally, there were many Indian and a few Chinese in the Capetown area, from the 1860s onward, who are thought to have contributed to CMA ancestry (*S135*). These results are consistent with the supervised STRUCTURE analysis, using the same set of training populations as was used for determining African American ancestry (**Table S7**). As expected, the proportion of Bantu Niger-Kordofanian ancestry (mean 0.10) is higher than the proportion of non-Bantu Niger-Kordofanian ancestry (mean 0.04) in the CMA.

### **The genetic, linguistic, and geographic landscape of Africa**

A number of factors could have contributed to isolation and differentiation of populations in Africa, including climatic fluctuations such as an extreme dry spell from ~60,000 – 30,000 ya (*S137*), the cold and dry last glacial maximum in Africa, ~21K – 15 kya, followed at ~13,700 – 12,300 ya by another period of cooler and drier conditions (*S93*). Indeed, the period of diversification of the major African language families is thought to date back to ~15K – 11 kya. Differentiation and expansion of ancestral African populations across Africa from regions of refugia, such as the Ethiopian highlands, may have occurred during the interludes of these cold and dry periods (*S93*). Additionally, based on the archeological record, expansion and differentiation of African populations during the later stages of the African Middle Stone Age (MSA), from ~75,000 – 55,000 years ago, may have coincided with the origin and spread of radically new technological developments, including new patterns of blade technology, tools used for skin working and for cutting bone and wood, and stone barbs using for hunting and fishing as well long distance trade of shell ornamentation and red ochre engraved with unique decorative patterns interpreted as “abstract art” (*S137-139*). Analyses of nucleotide and haplotype variation in Africans will be informative for estimating the age of the inferred ancestral clusters and for distinguishing genetic similarity due to common ancestry or gene flow.

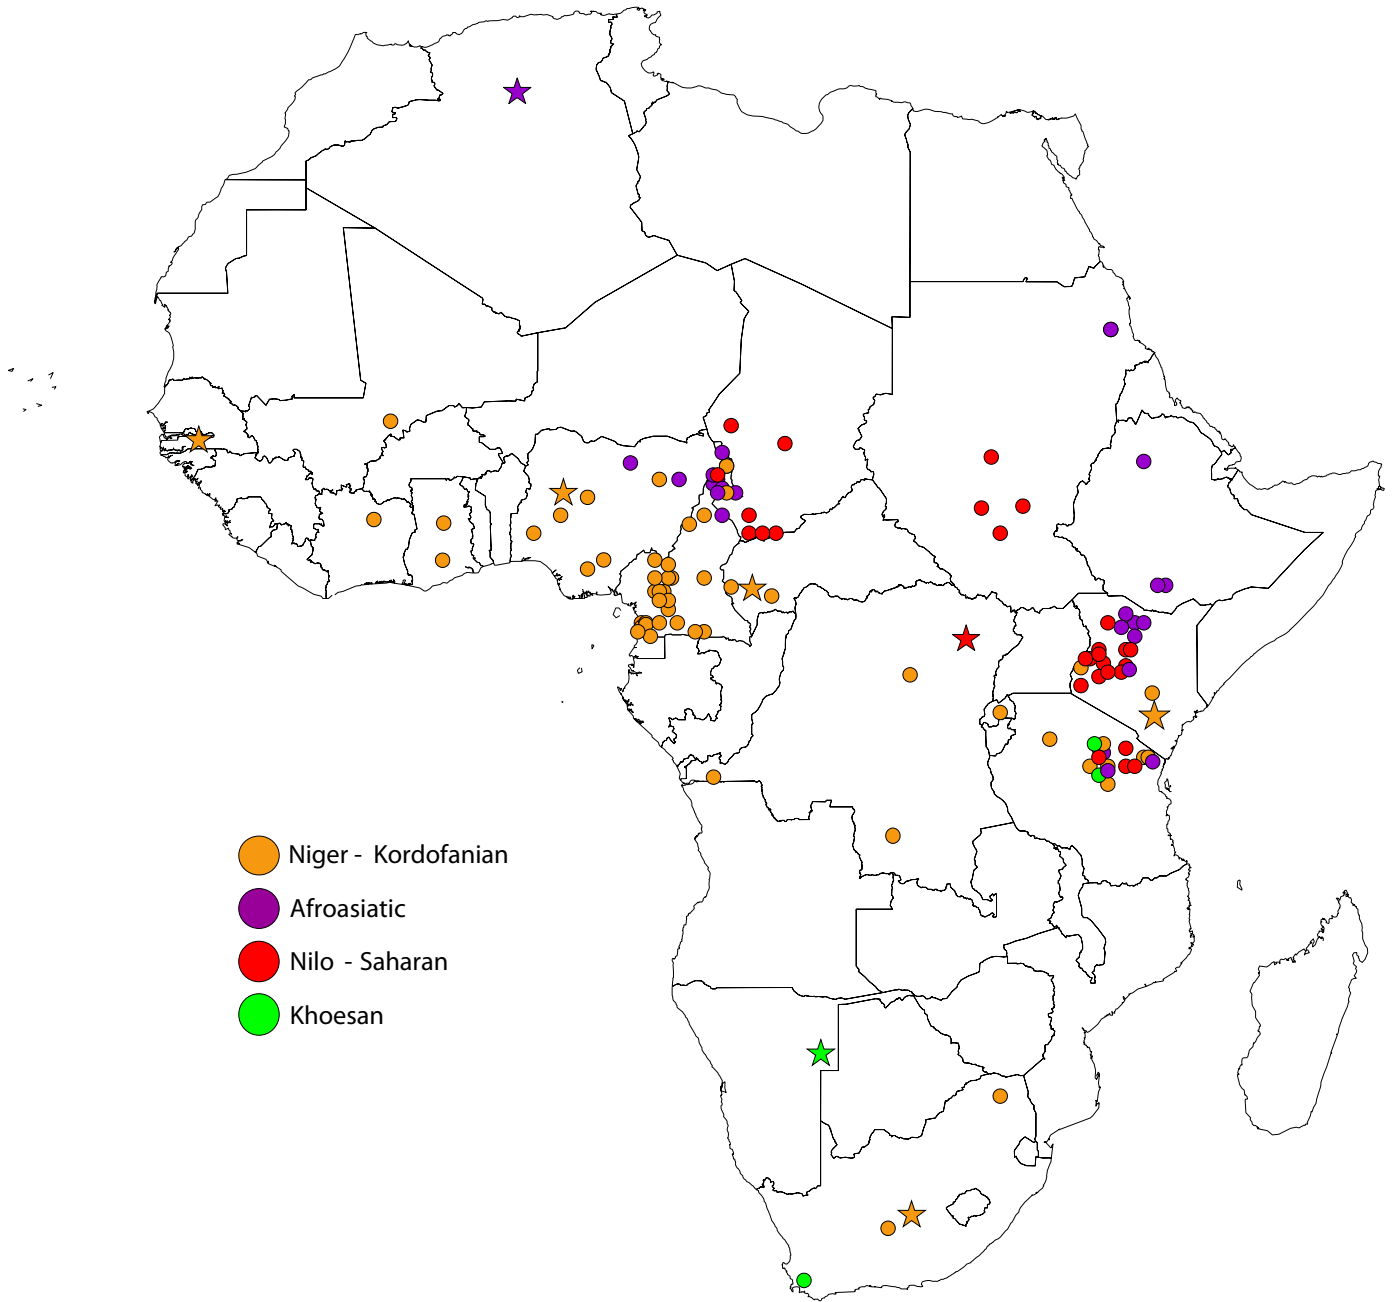

**Figure S1** : Geographic distribution of 121 African populations included in the current study. Populations are color-coded according to language classification. Stars indicate samples from the Centre d'Etude du Polymorphisme Humain (CEPH) human genome diversity panel (HGDP) (S4-6, S30).





C

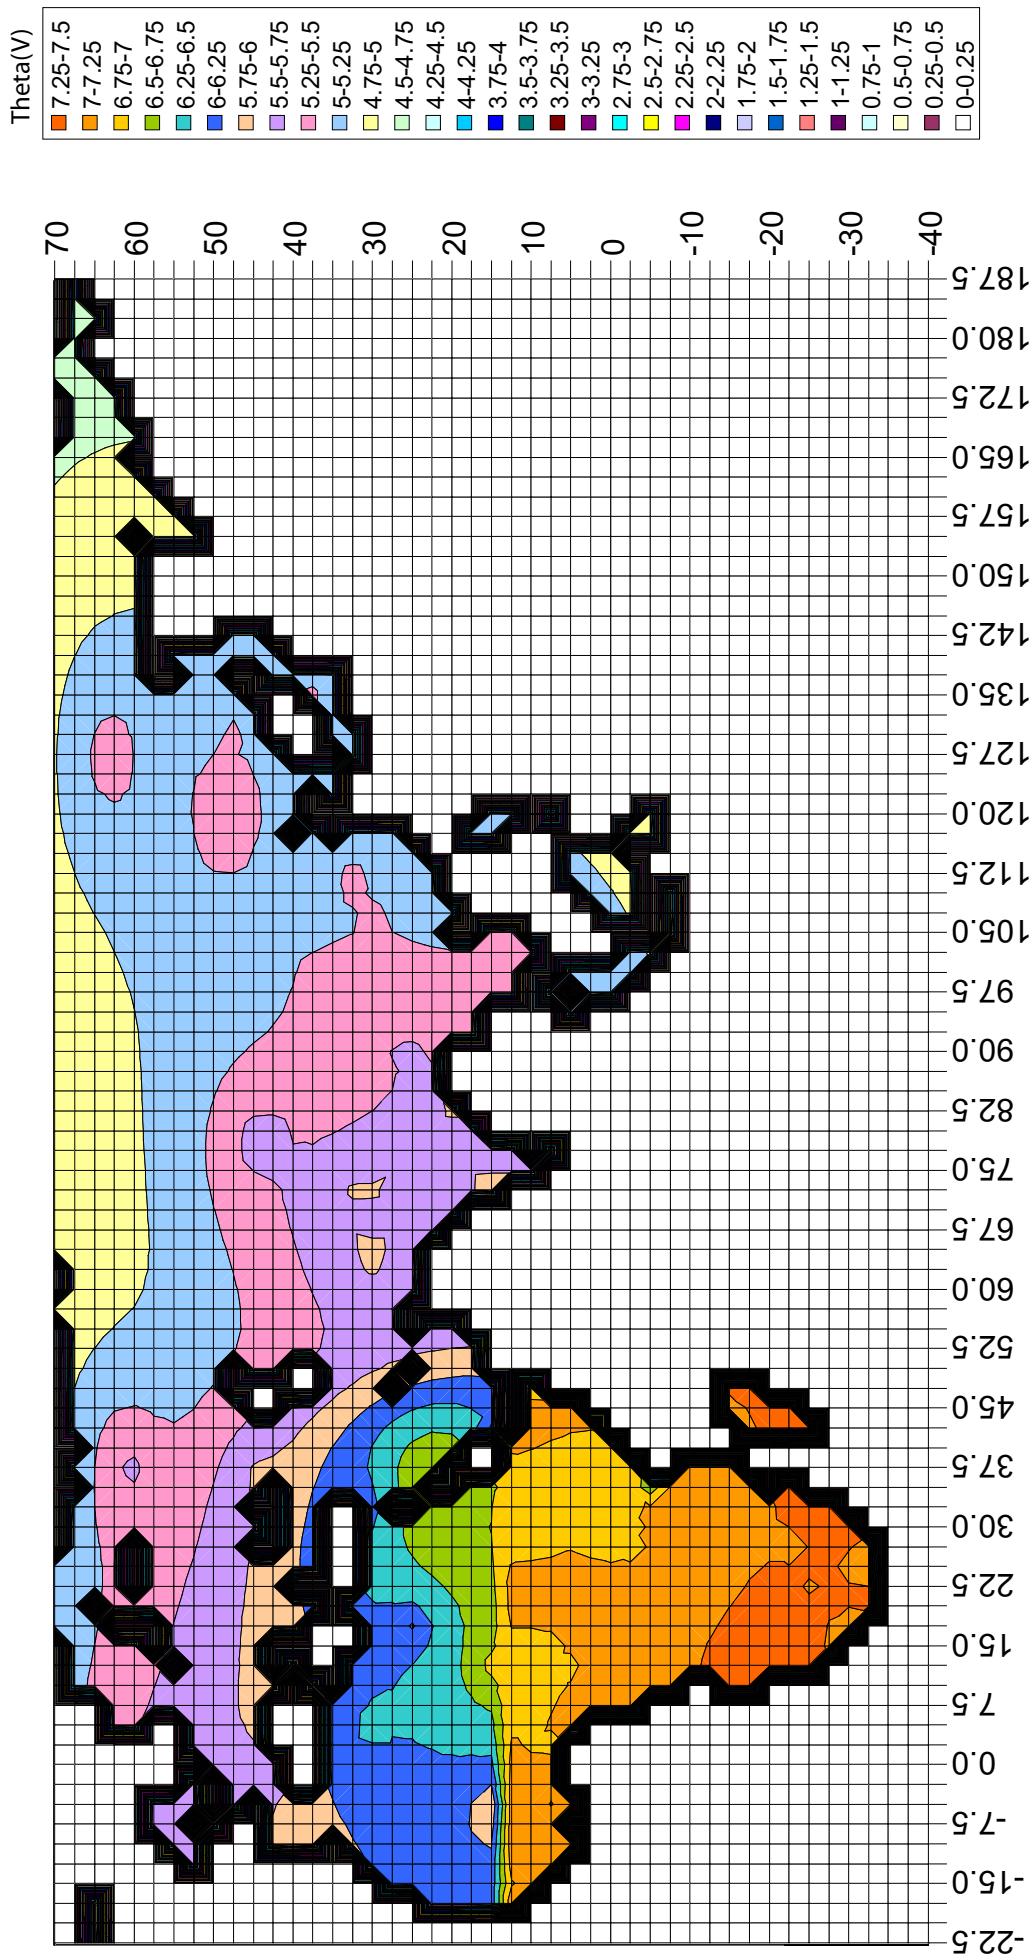

**Figure S2** : Comparison of genetic diversity ( $\theta$ ) **A**) from microsatellite allele size variance, **B**) from heterozygosity. Pygmy, San, Hadza, and Sandawe hunter gatherer populations are highlighted in larger font, and **C**) Estimated levels of  $\theta$  by using a linear regression weighted by geographic distance away from each point of evaluation.

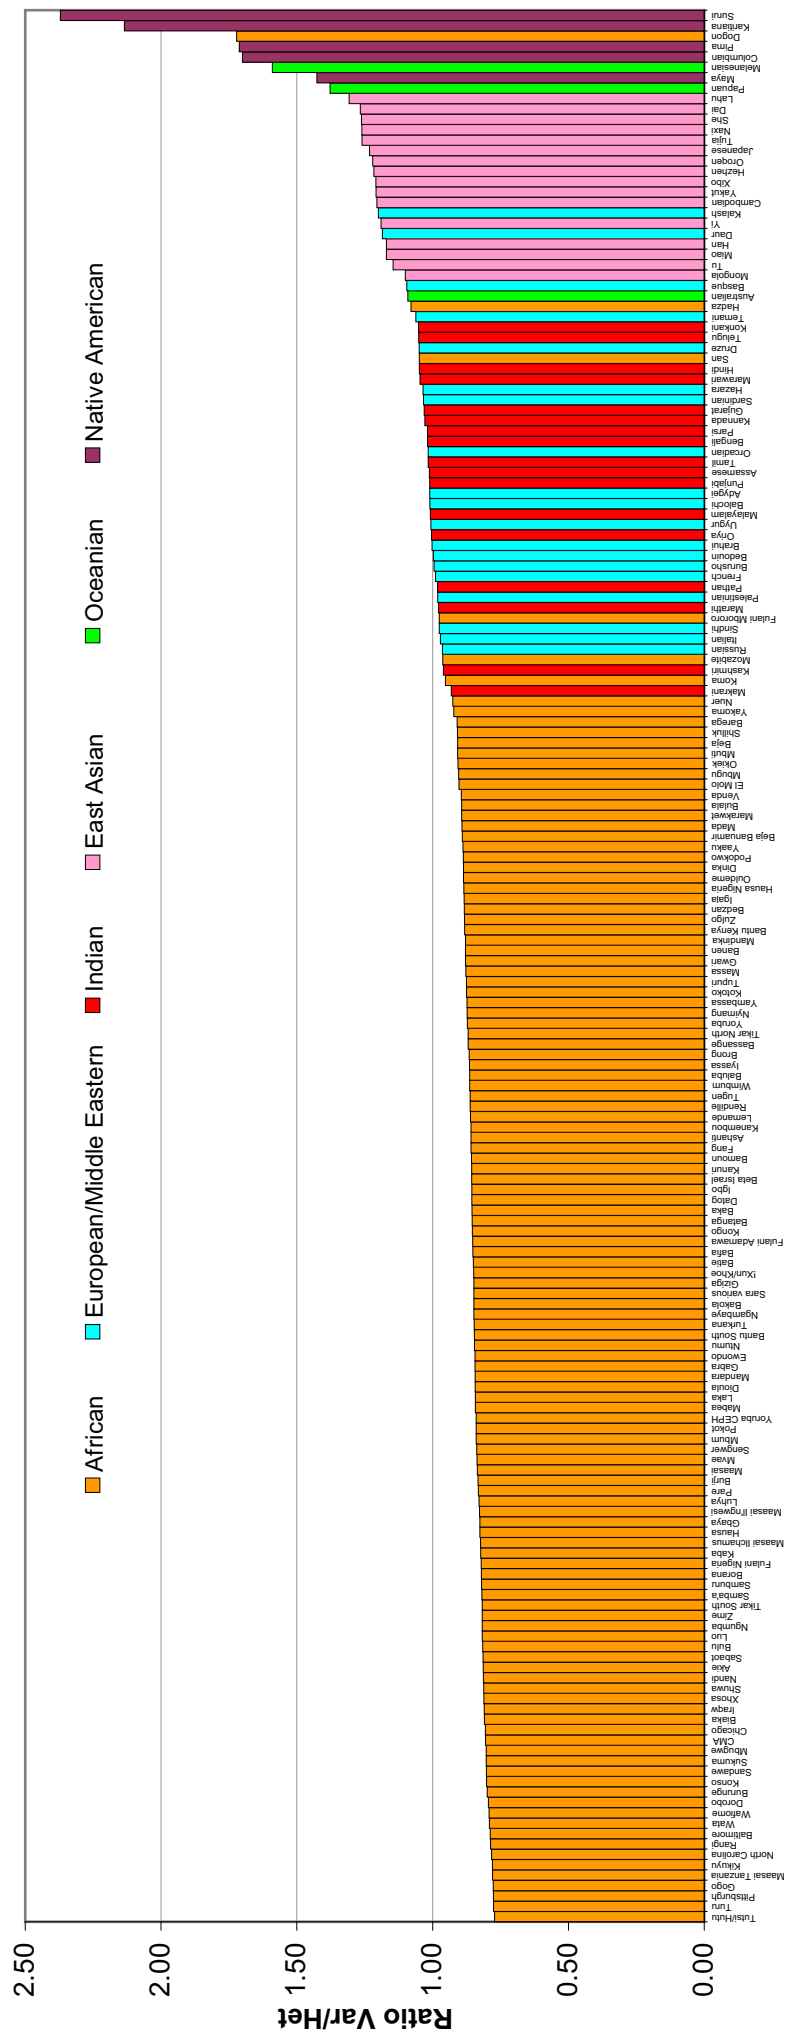

Populations

**Figure S3:** Ratio of genetic diversity ( $\theta$ ) inferred from the sample variance in repeat length of the microsatellite alleles to that from heterozygosity (Het)



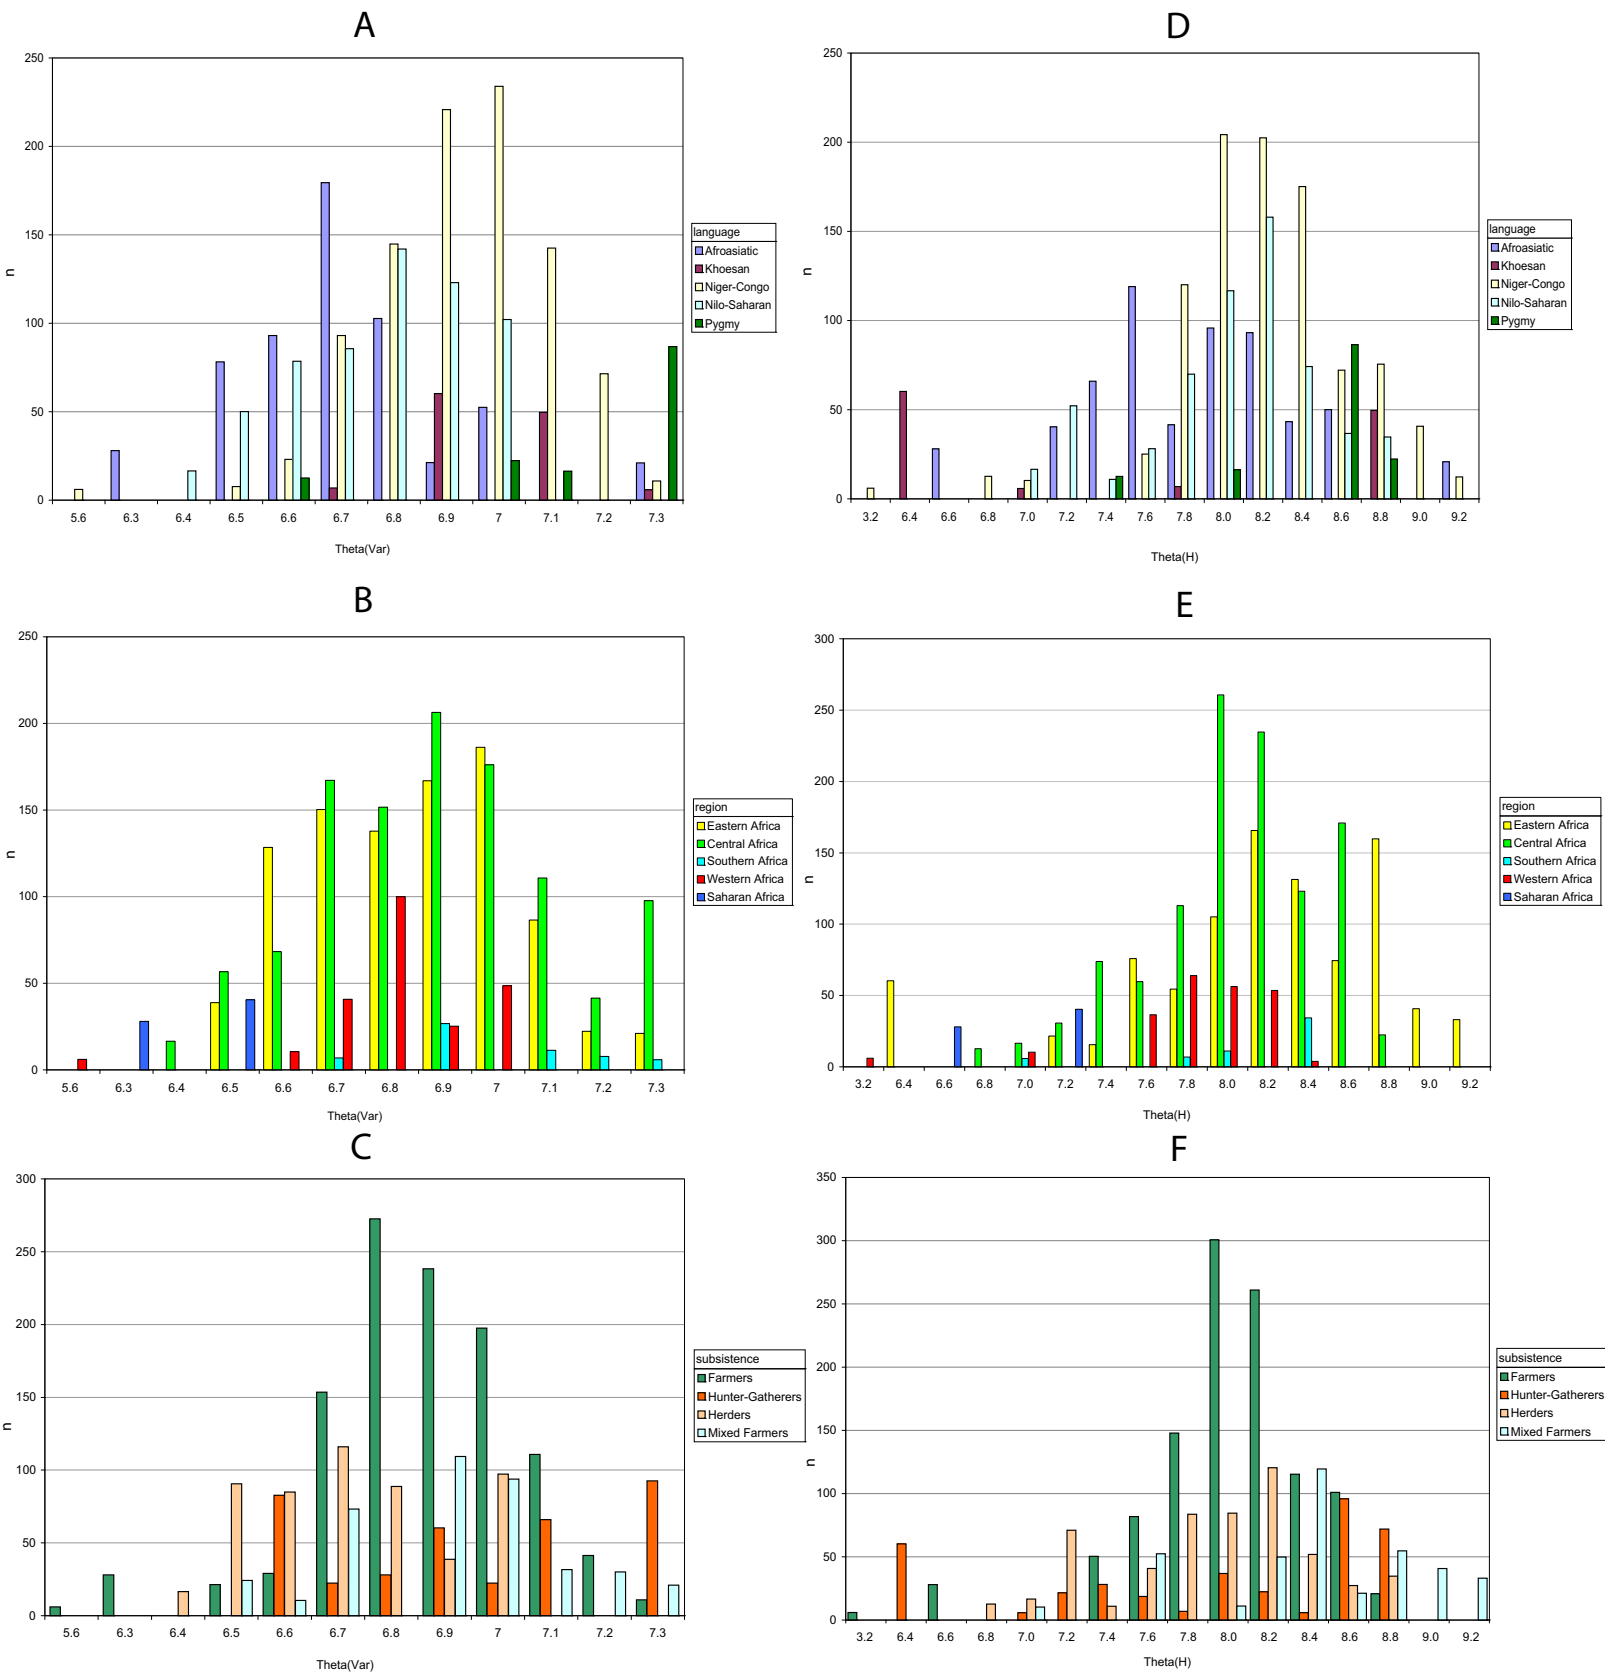

**Figure S5:** Genetic diversity ( $\theta$ ) from the sample variance in repeat length of the microsatellite alleles (A – C) and heterozygosity (D – F) for populations sorted by language classification (A, D), geographic location (B, E), and subsistence patterns (C,F).

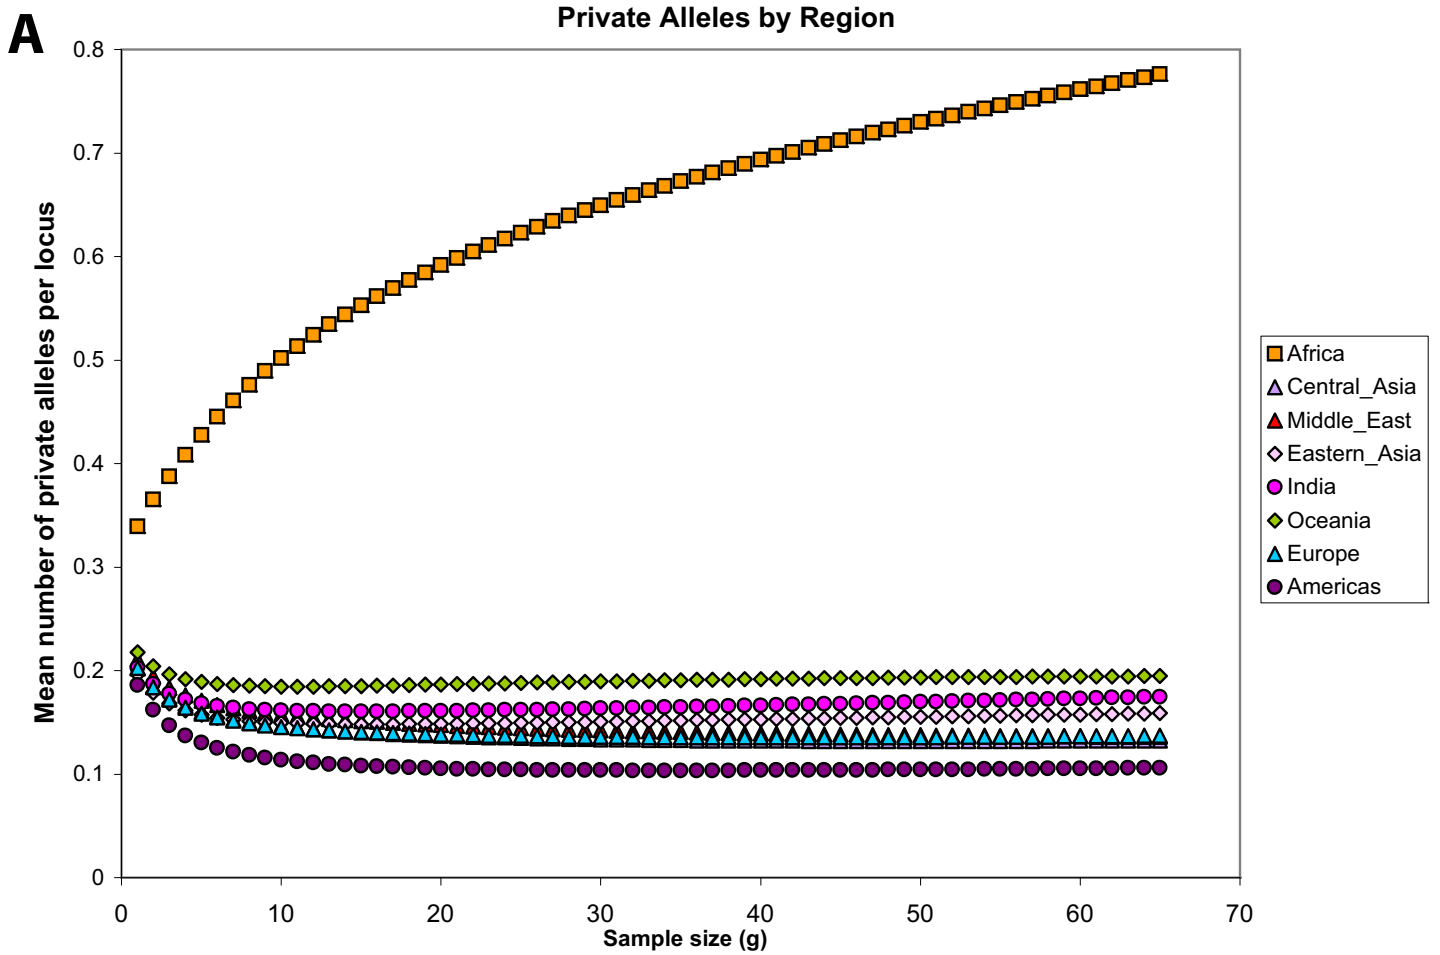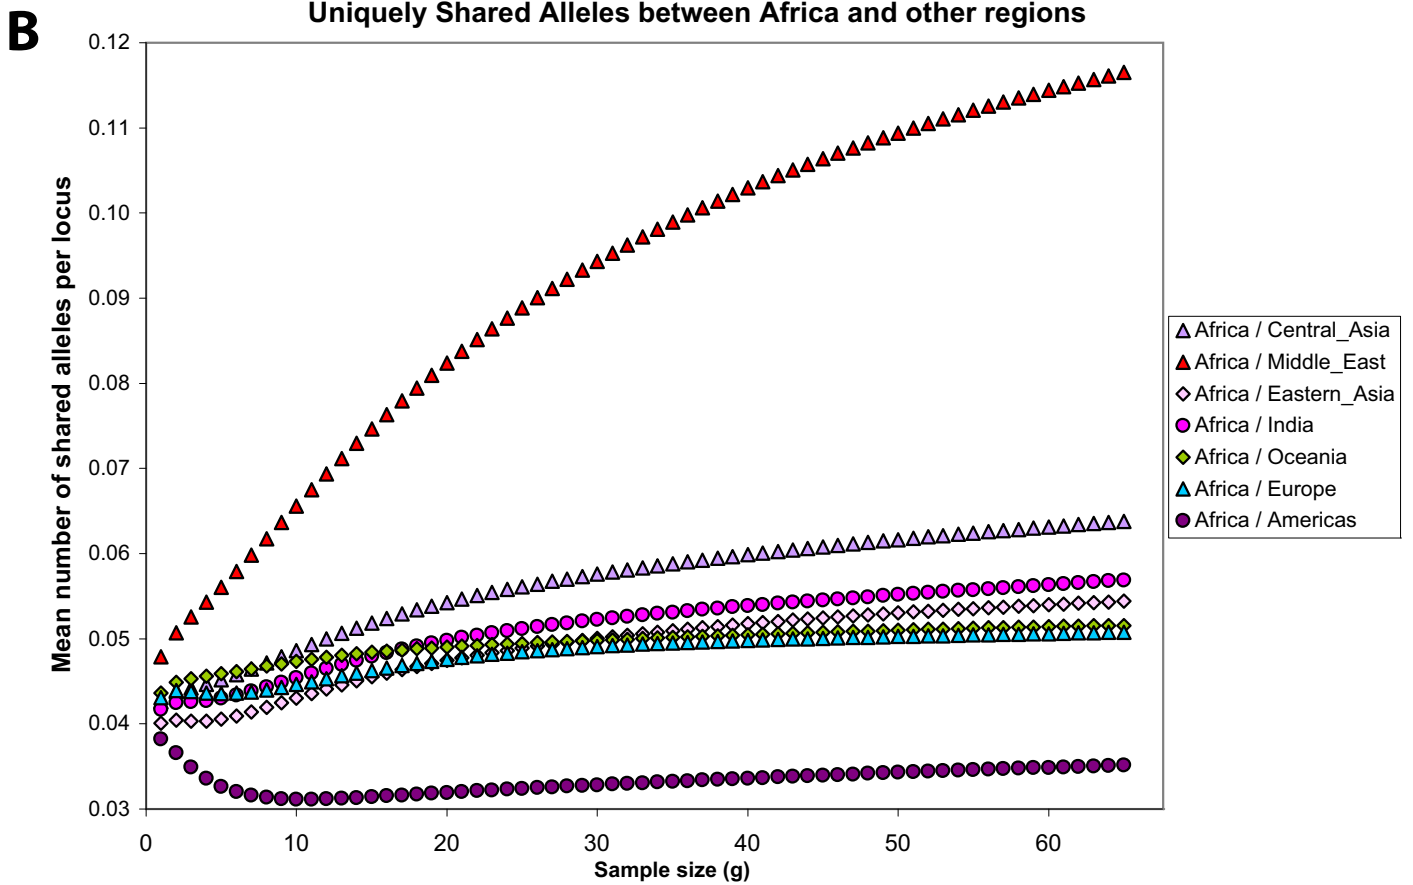

**Figure S6**

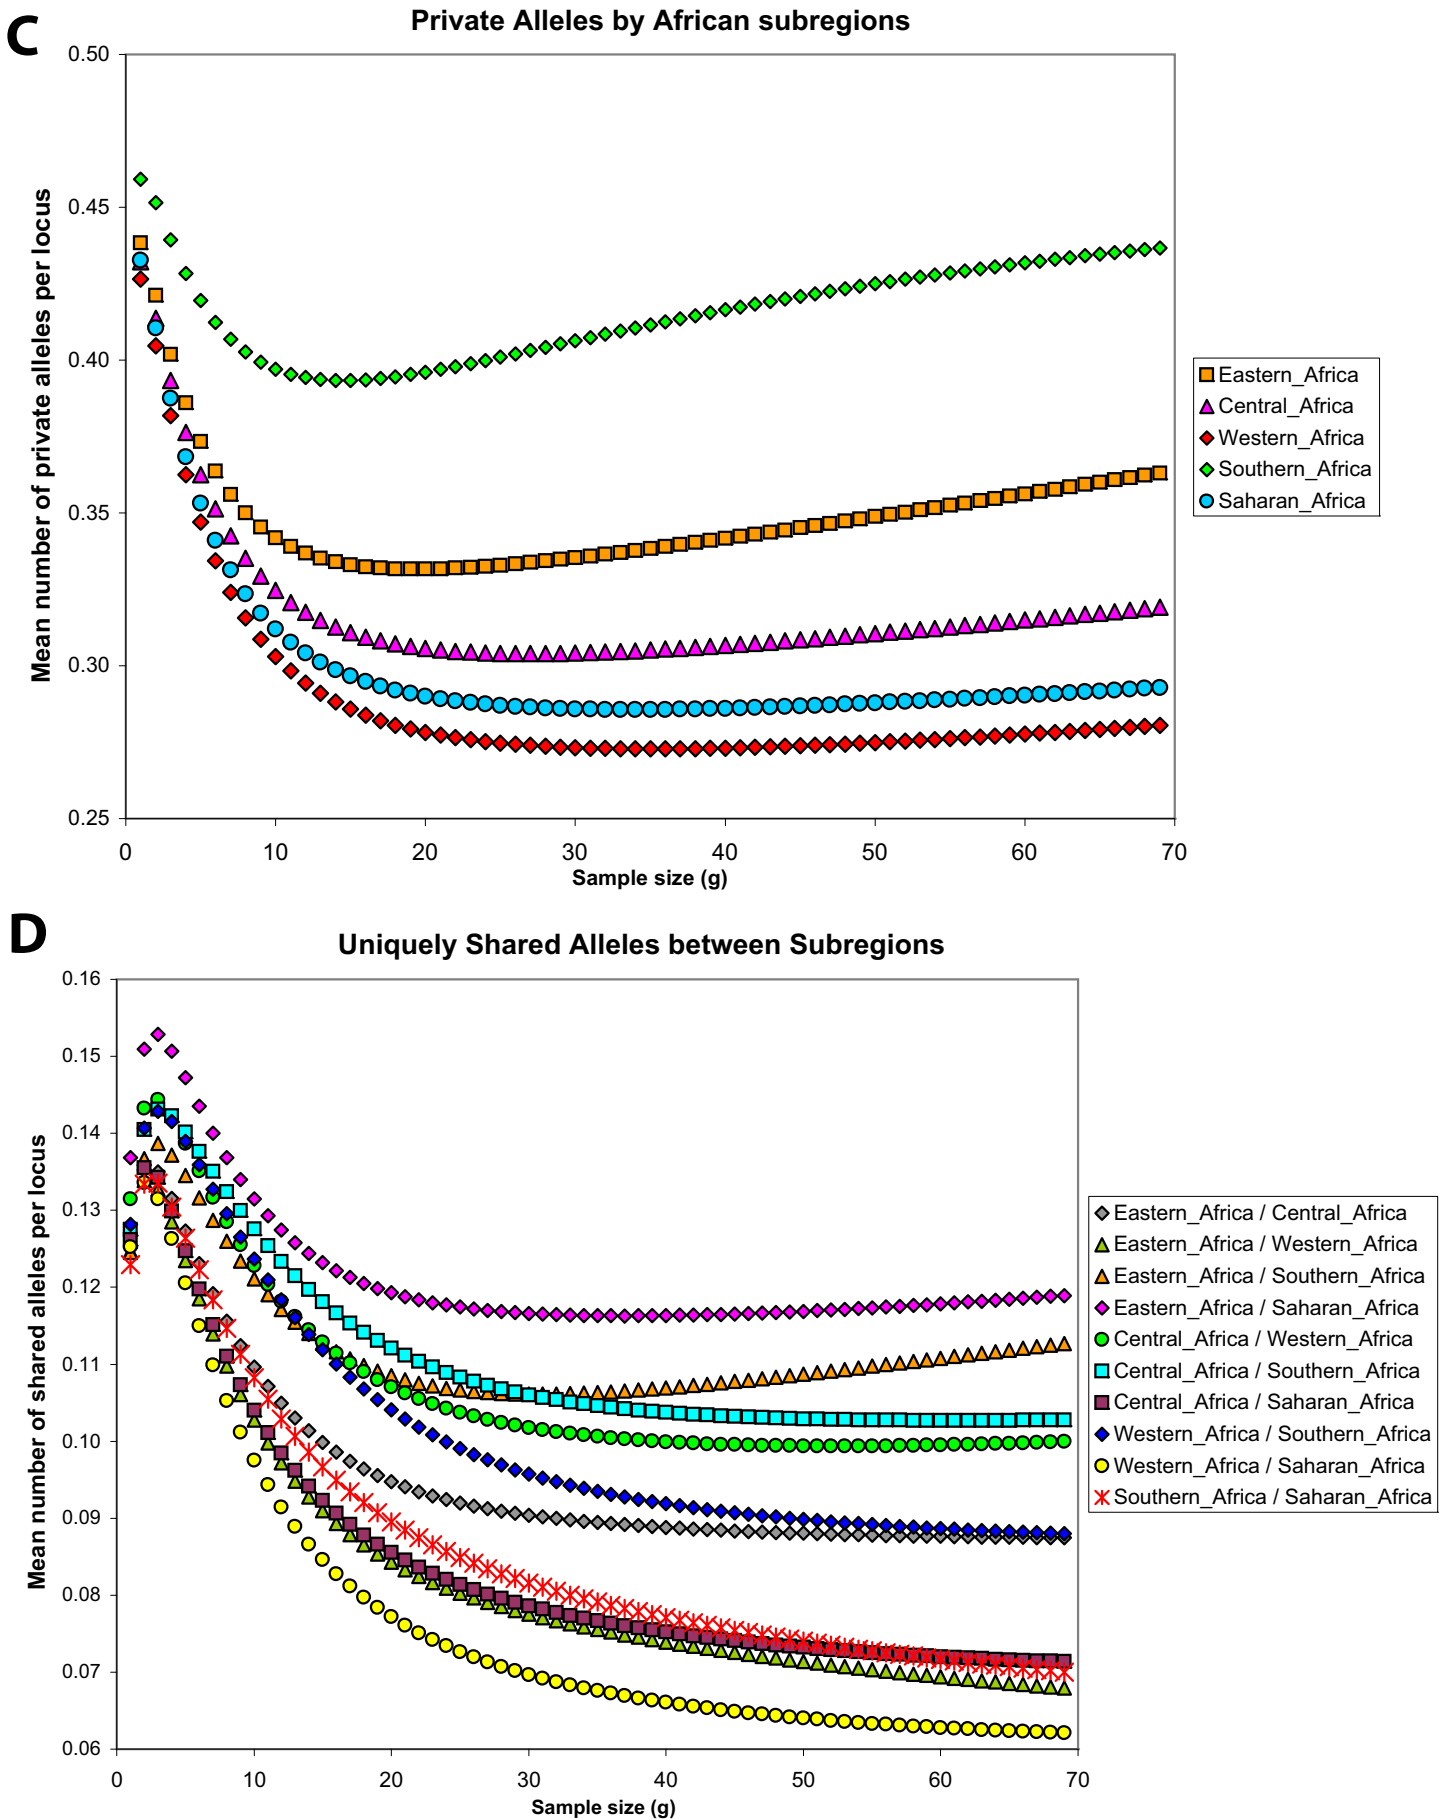

**Figure S6:** Inference of number of private and shared alleles across regions with the ADZE program (*S27*). This method estimates the number of alleles found in each of a set of populations but absent in all remaining populations, considering equal-sized sub-samples from each population. A) Number of private alleles by major geographic regions B). Uniquely shared alleles between Africa and other regions. C) Number of private alleles within African sub-regions. D) Uniquely shared alleles between African sub-regions.





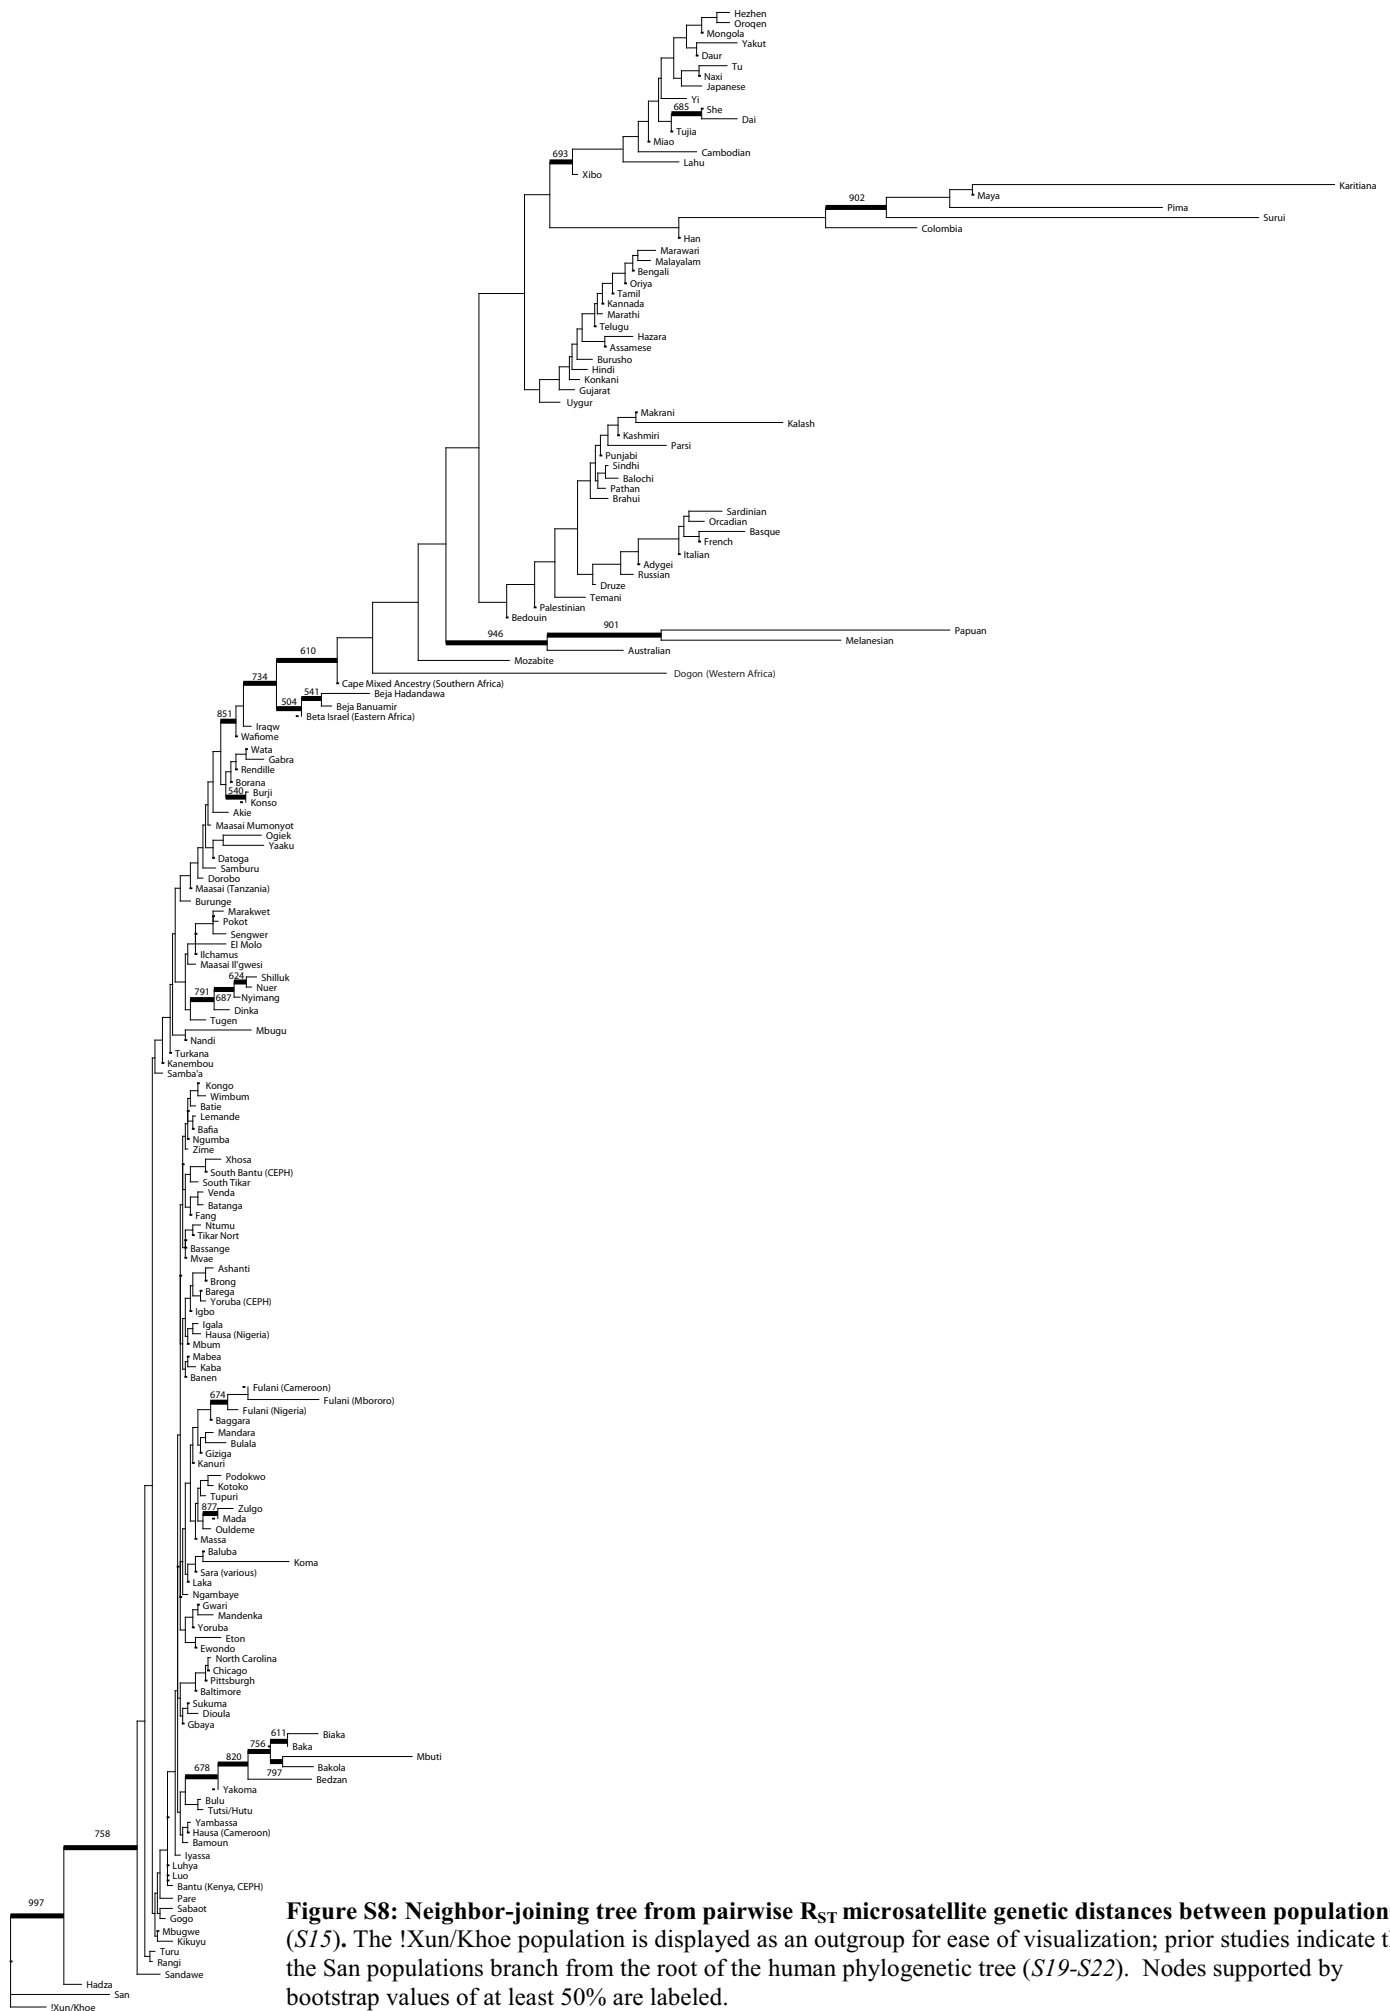

**Figure S8: Neighbor-joining tree from pairwise  $R_{ST}$  microsatellite genetic distances between populations (S15).** The !Xun/Khoe population is displayed as an outgroup for ease of visualization; prior studies indicate that the San populations branch from the root of the human phylogenetic tree (S19-S22). Nodes supported by bootstrap values of at least 50% are labeled.

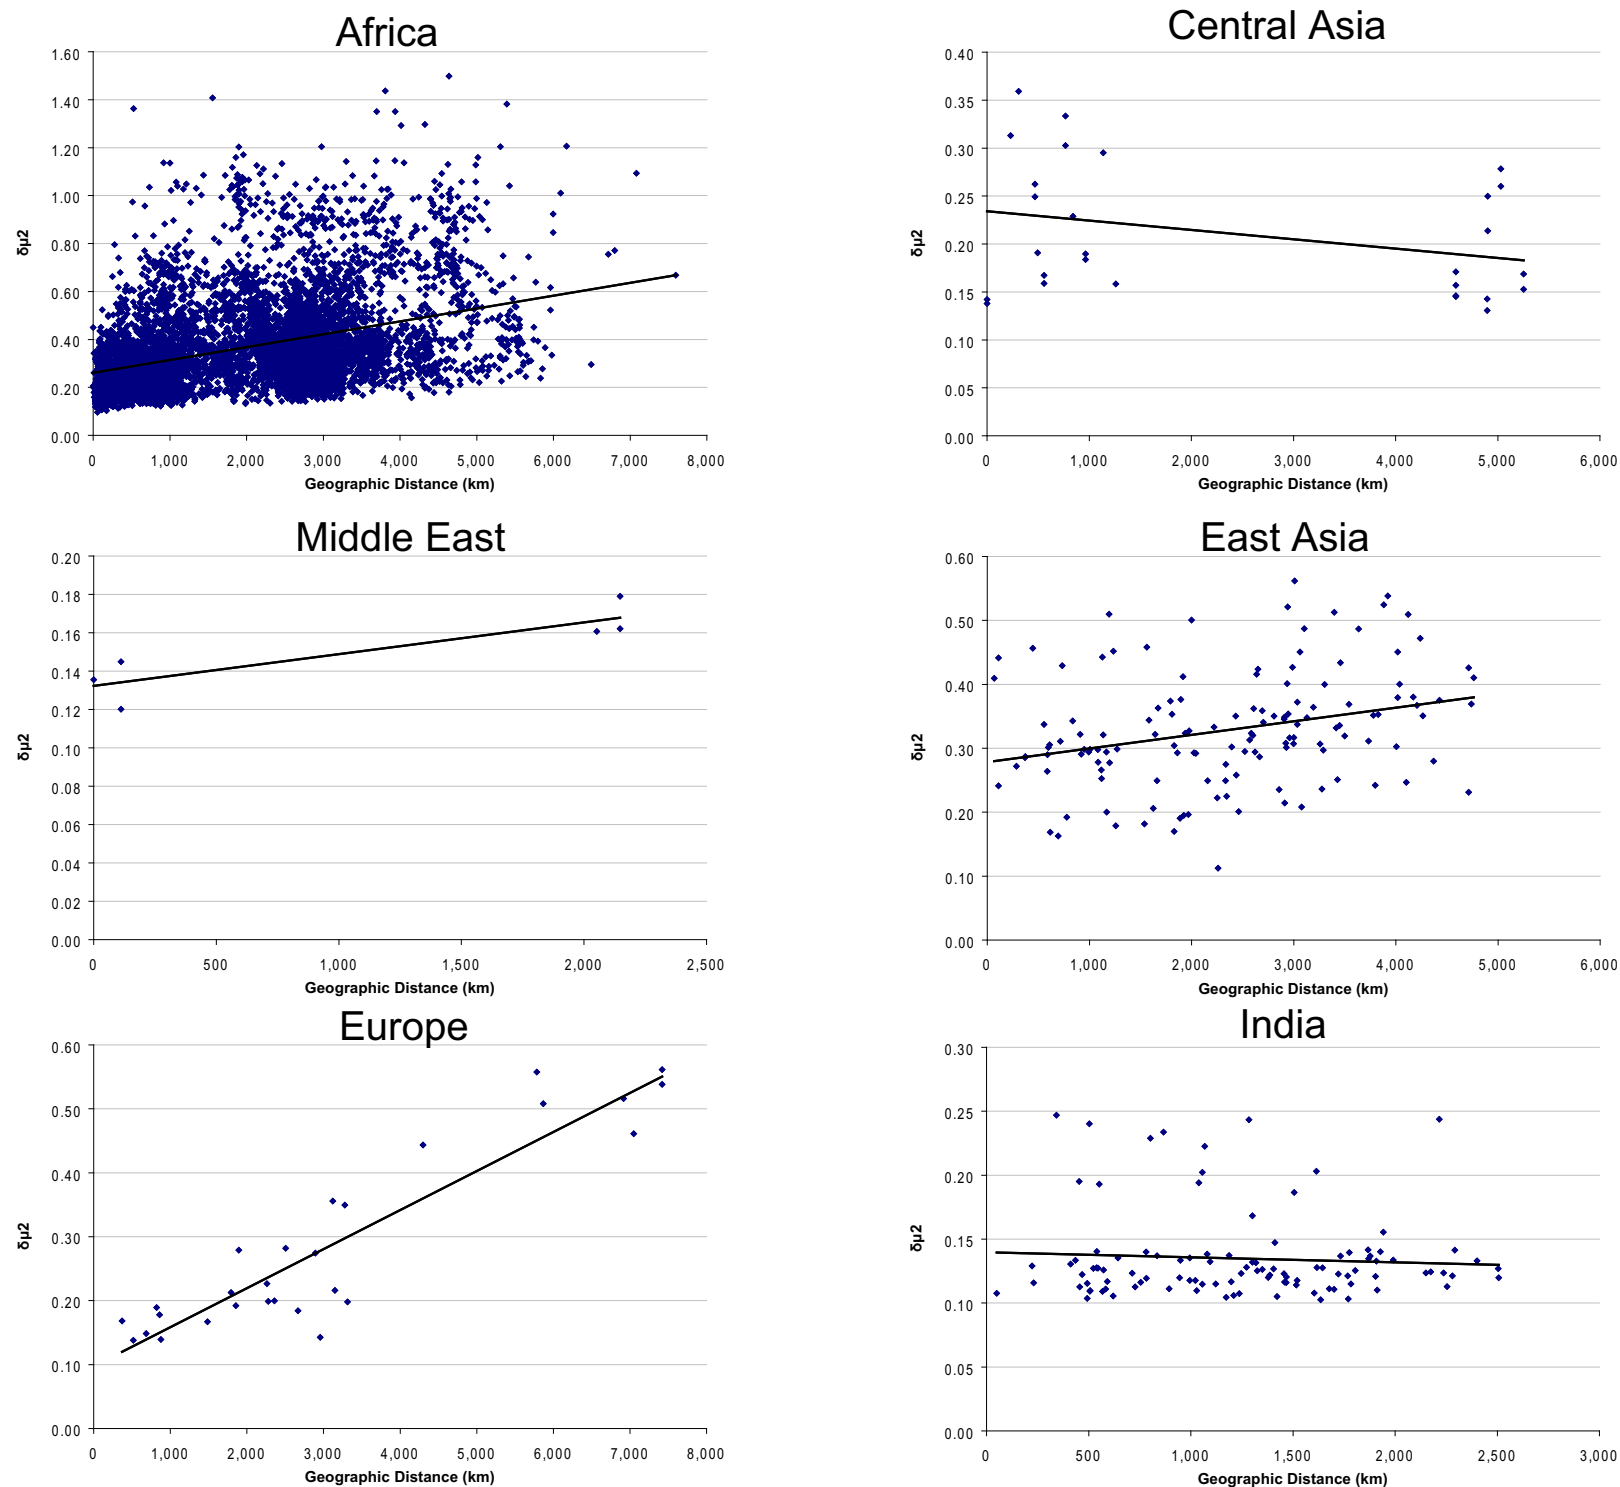

**Figure S9:** Geographic distance between populations (km) versus pairwise  $(\delta\mu)^2$  genetic distances between populations for each major geographic region. We observe a linear correlation between geographic and genetic distance as expected under an isolation by distance model. The largest correlations (Spearman  $\rho$ ) were observed in Europe ( $\rho=0.83$ ), the Middle East ( $\rho=0.88$ ) and in Africa ( $\rho=0.40$ ) (Table S5).

# Africa

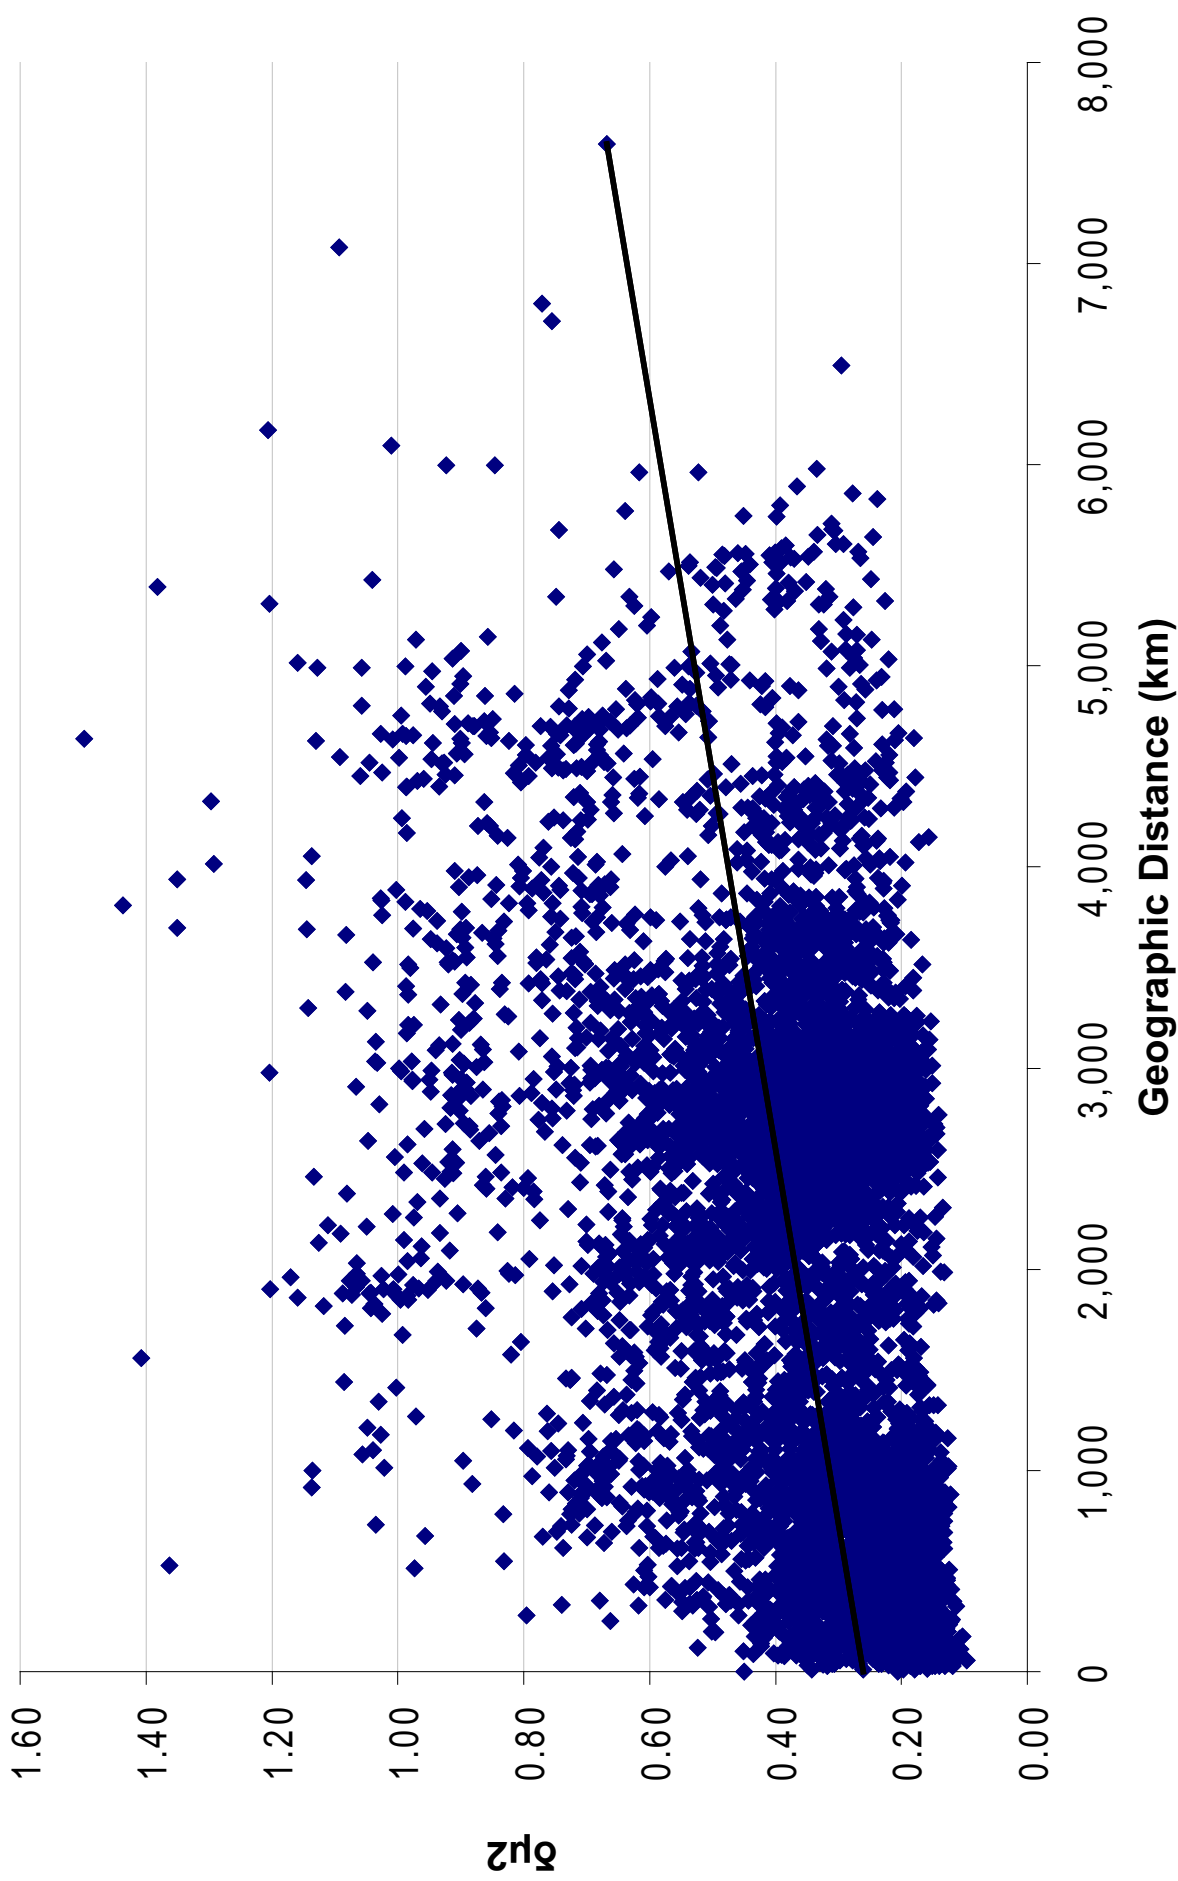

**Figure S10:** Great circle geographic distance (km) versus pairwise genetic distances  $(\delta\mu)^2$  between populations within Africa. Generally speaking, we observe a linear correlation between geographic and genetic distance as expected under an isolation by distance model

### Saharan Africa

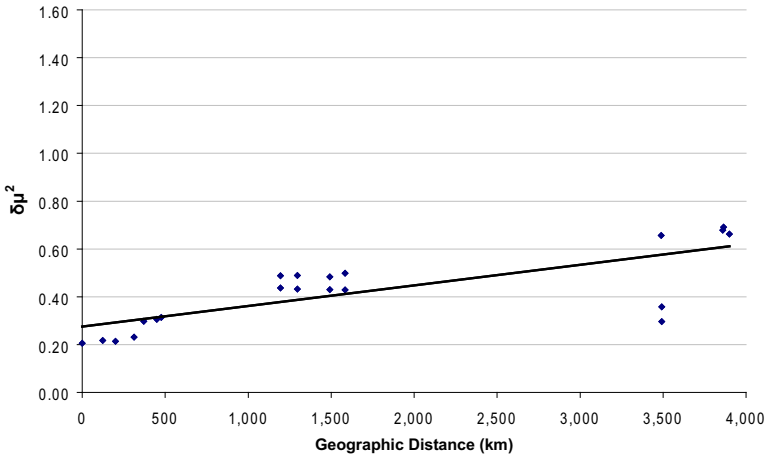

### Southern Africa

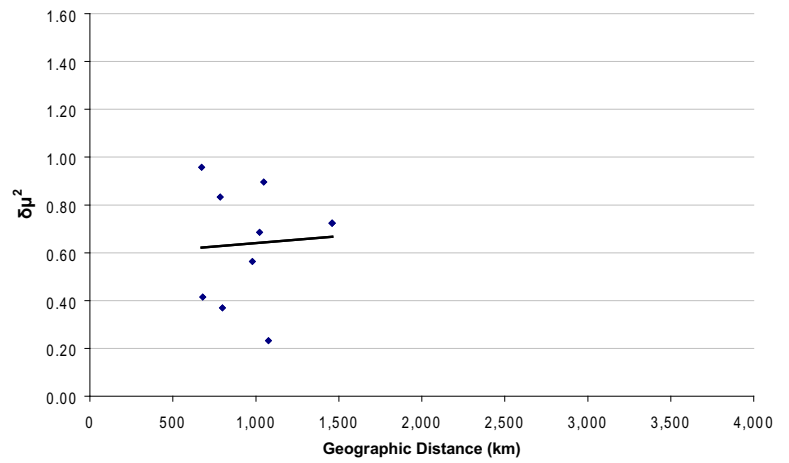

### Eastern Africa

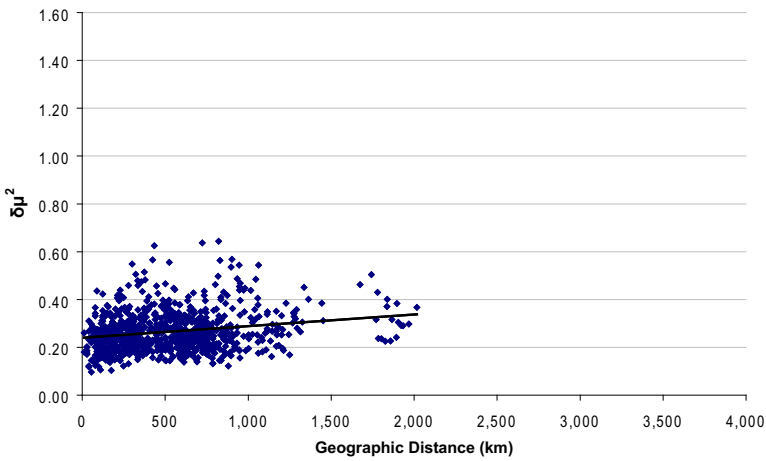

### Western Africa

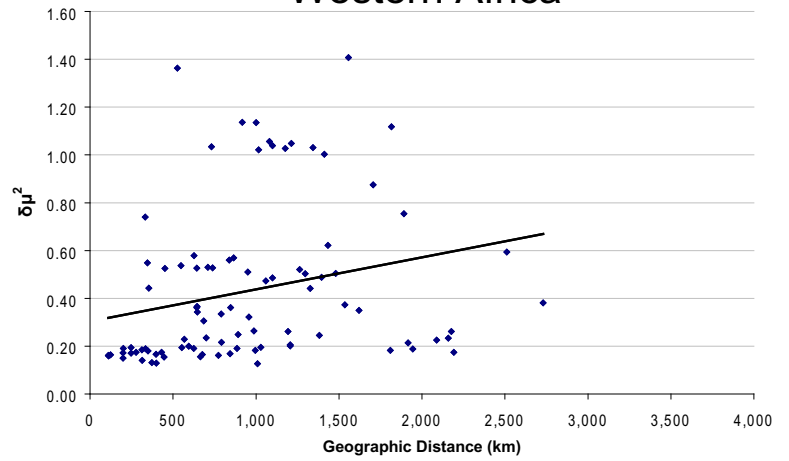

### Central Africa

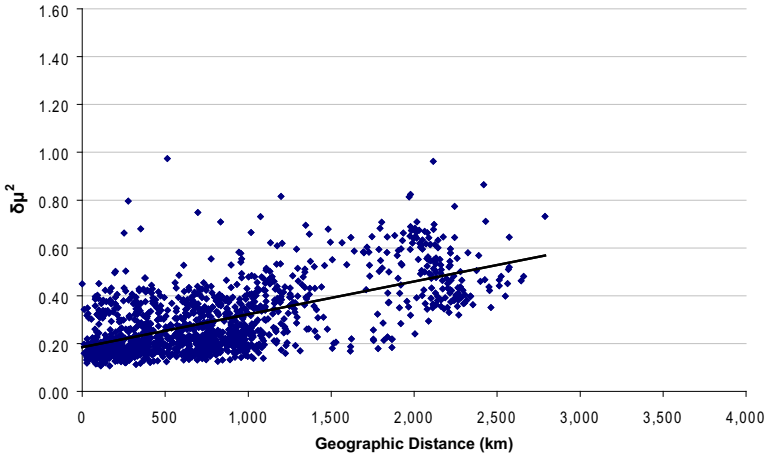

**Figure S11:** Great circle geographic distance (km) versus pairwise genetic distances ( $\delta\mu^2$ ) between populations within each major geographic region of Africa. The largest correlations (Spearman  $\rho$ ) were observed in Saharan Africa ( $\rho=0.76$ ) and the smallest in East Africa ( $\rho=0.19$ ) (Table S4).

# Global Secondary Modes

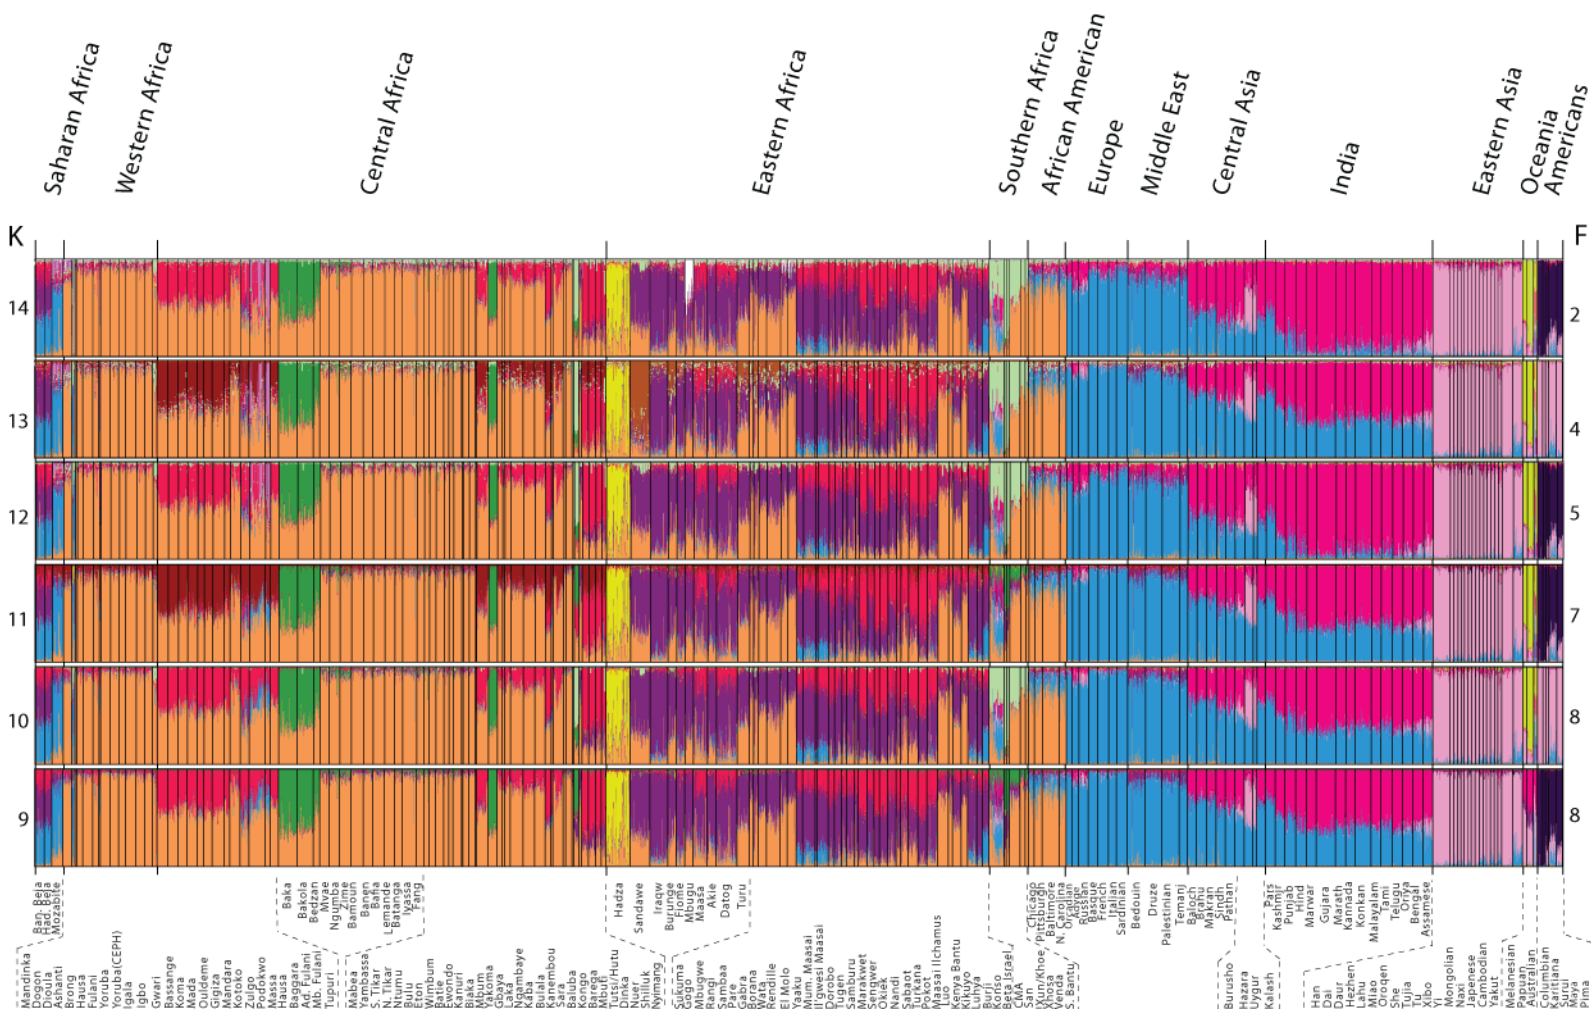

**Figure S12:** Secondary Modes for STRUCTURE analysis (29) for K = 9 – 14 for the global population dataset.

# Global

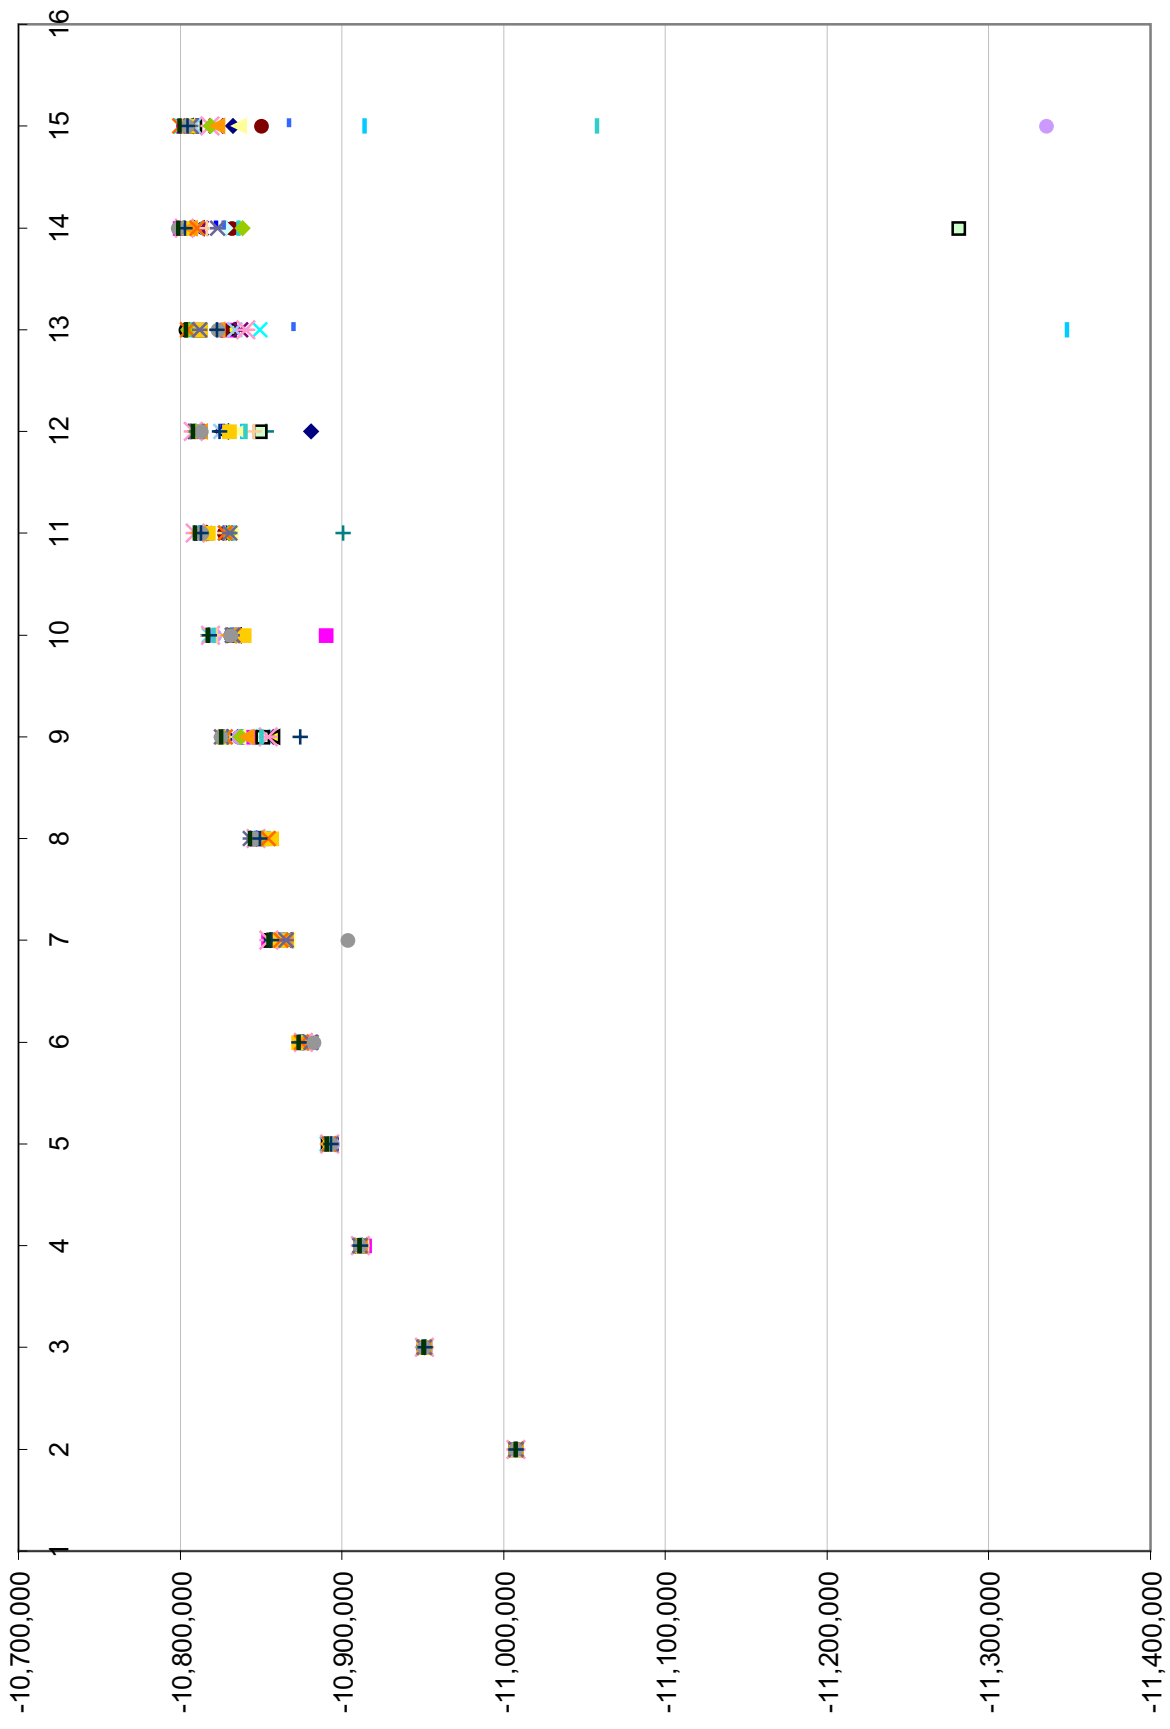

**Figure S13:** Likelihood scores for 25 STRUCTURE runs for the global set of samples for  $K = 2 - 15$

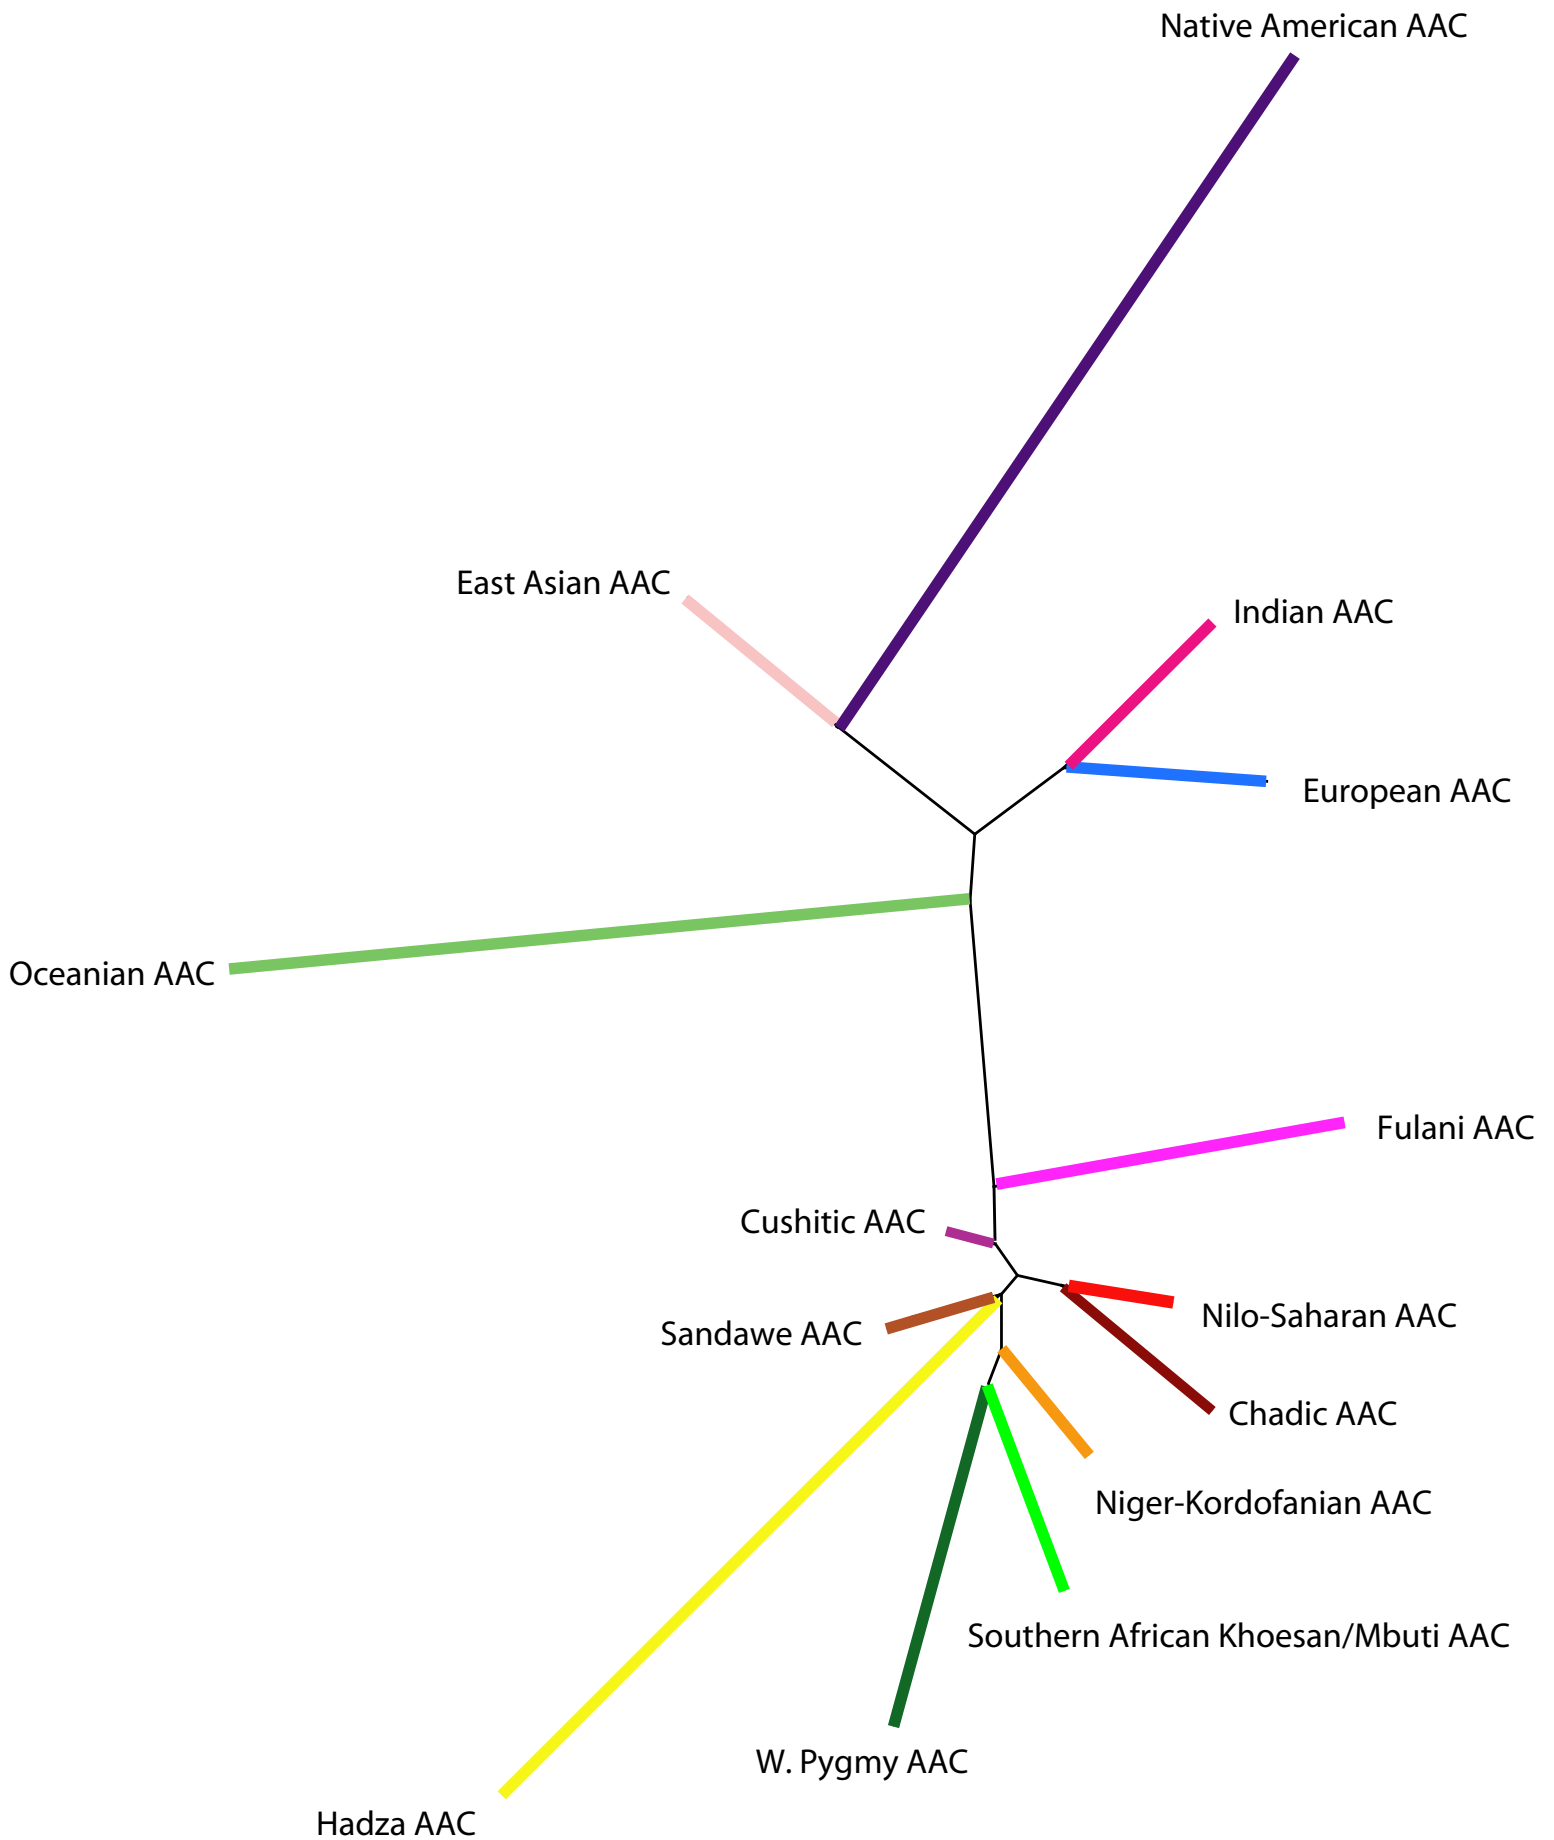

**Figure S14:** Un-rooted neighbor-joining tree based on pairwise nucleotide genetic distances using inferred ancestral allele frequencies from the global STRUCTURE analysis at  $K = 14$ .



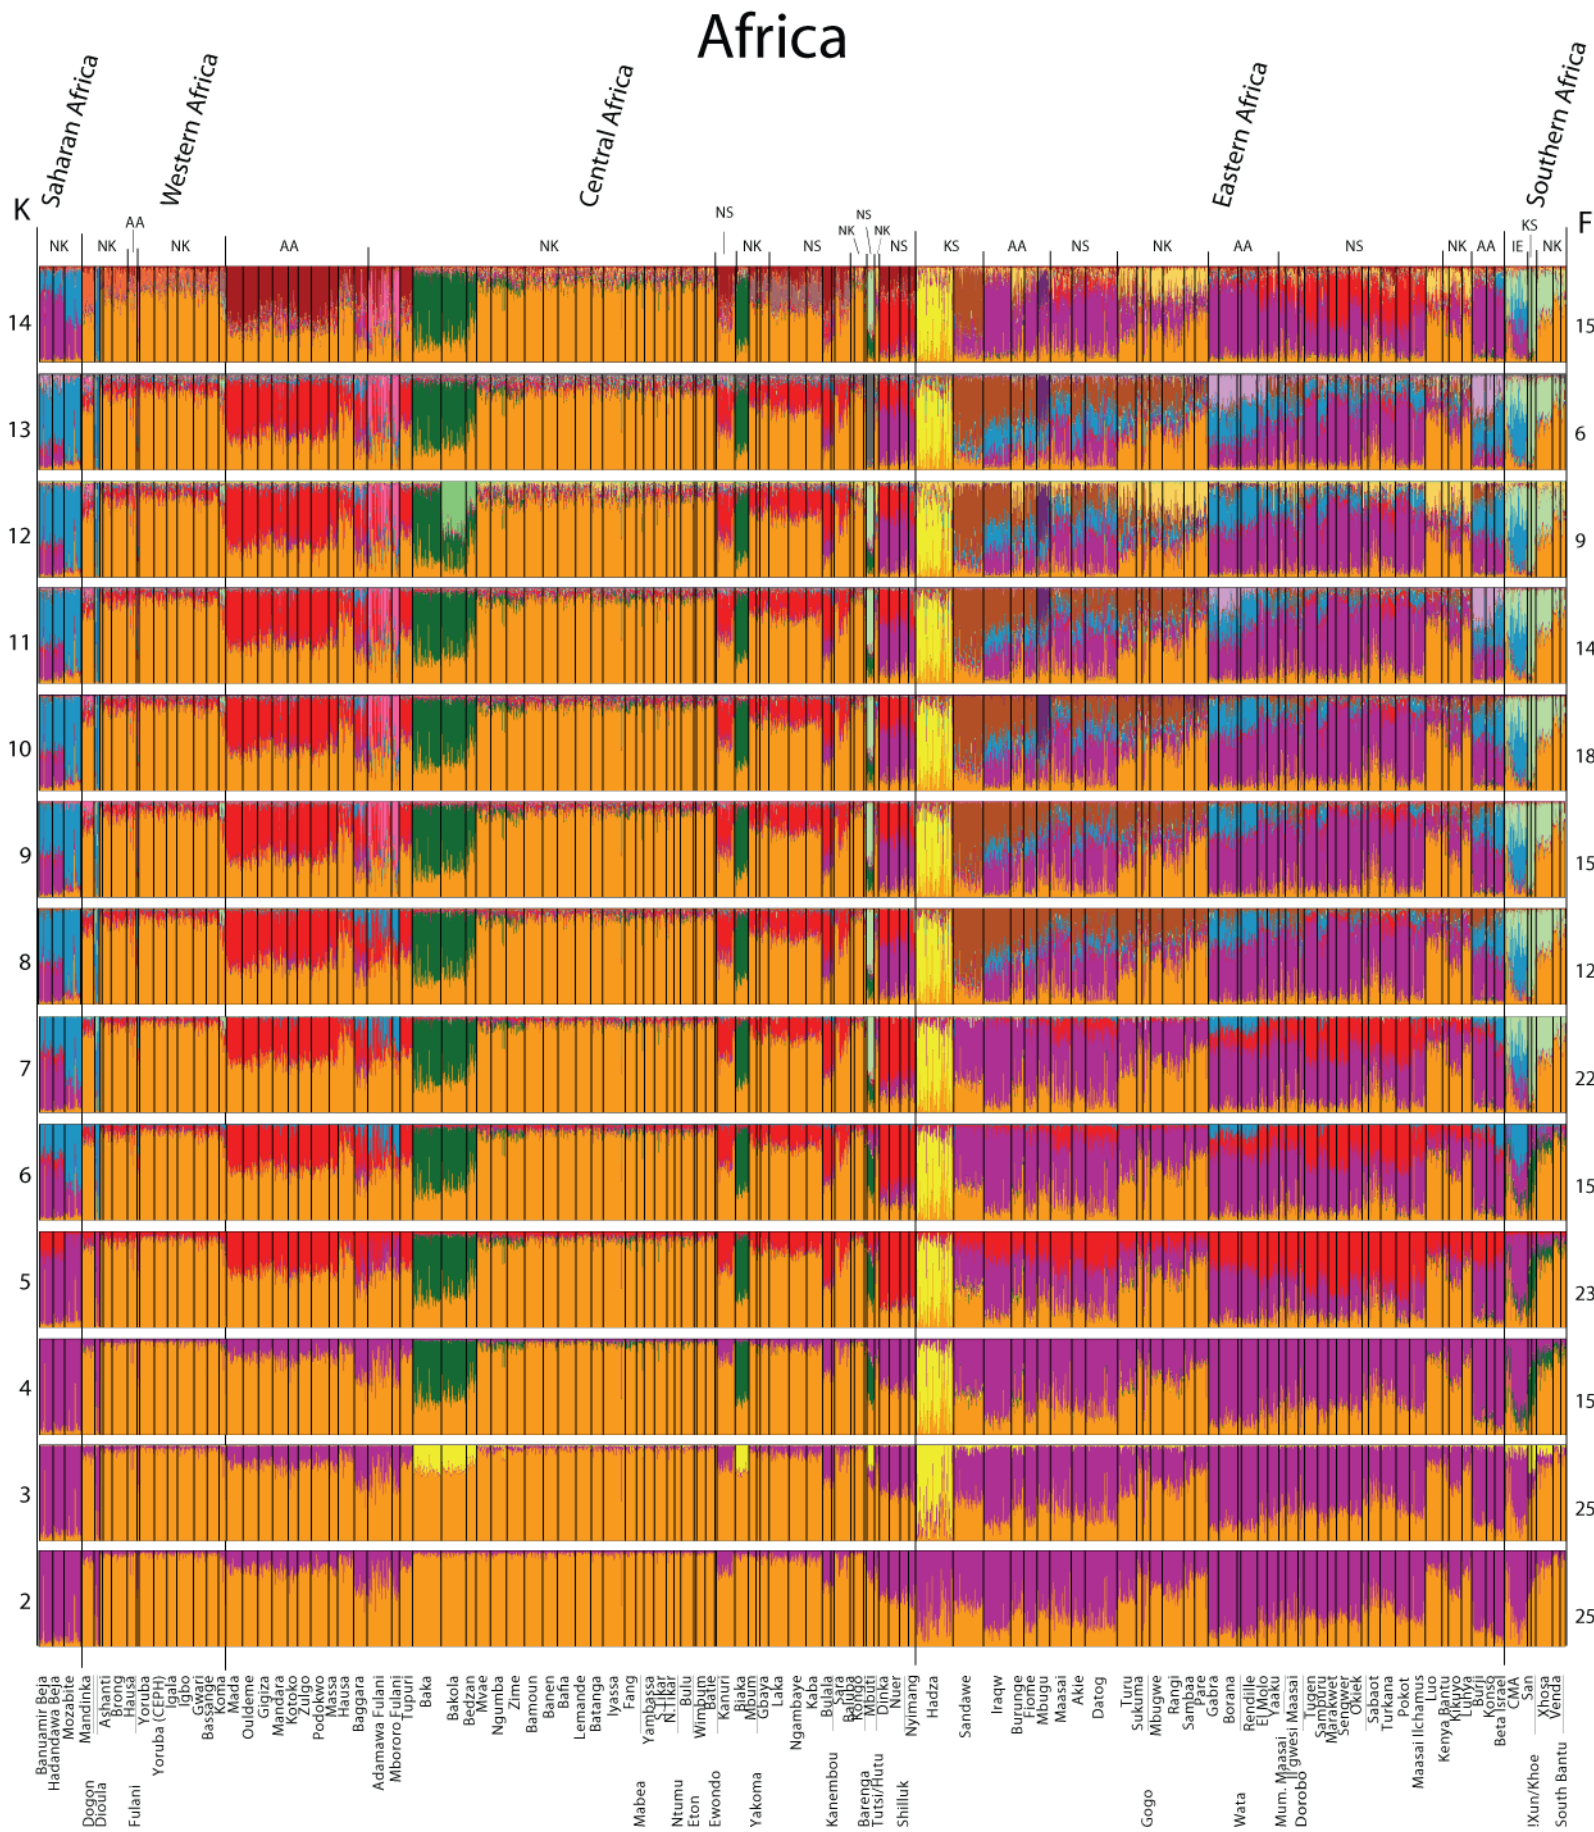

**Figure S15:** STRUCTURE analysis of the African dataset only (121 populations) with all genetic data (848 microsatellites, 476 indels and 3 SNPs) from  $K = 2 - 14$ . Each vertical line represents an individual. Individuals are clustered by self-identified ethnic group (shown at bottom) and ethnic groups are clustered by major geographic region. The colors represent the proportion of inferred ancestry from  $K$  ancestral populations. Values for  $K$  are shown on the left and the number of similar runs ( $F$ ) for the primary mode for each set of 25 STRUCTURE runs at each  $K$  value is shown on the right.



# Africa Secondary Modes

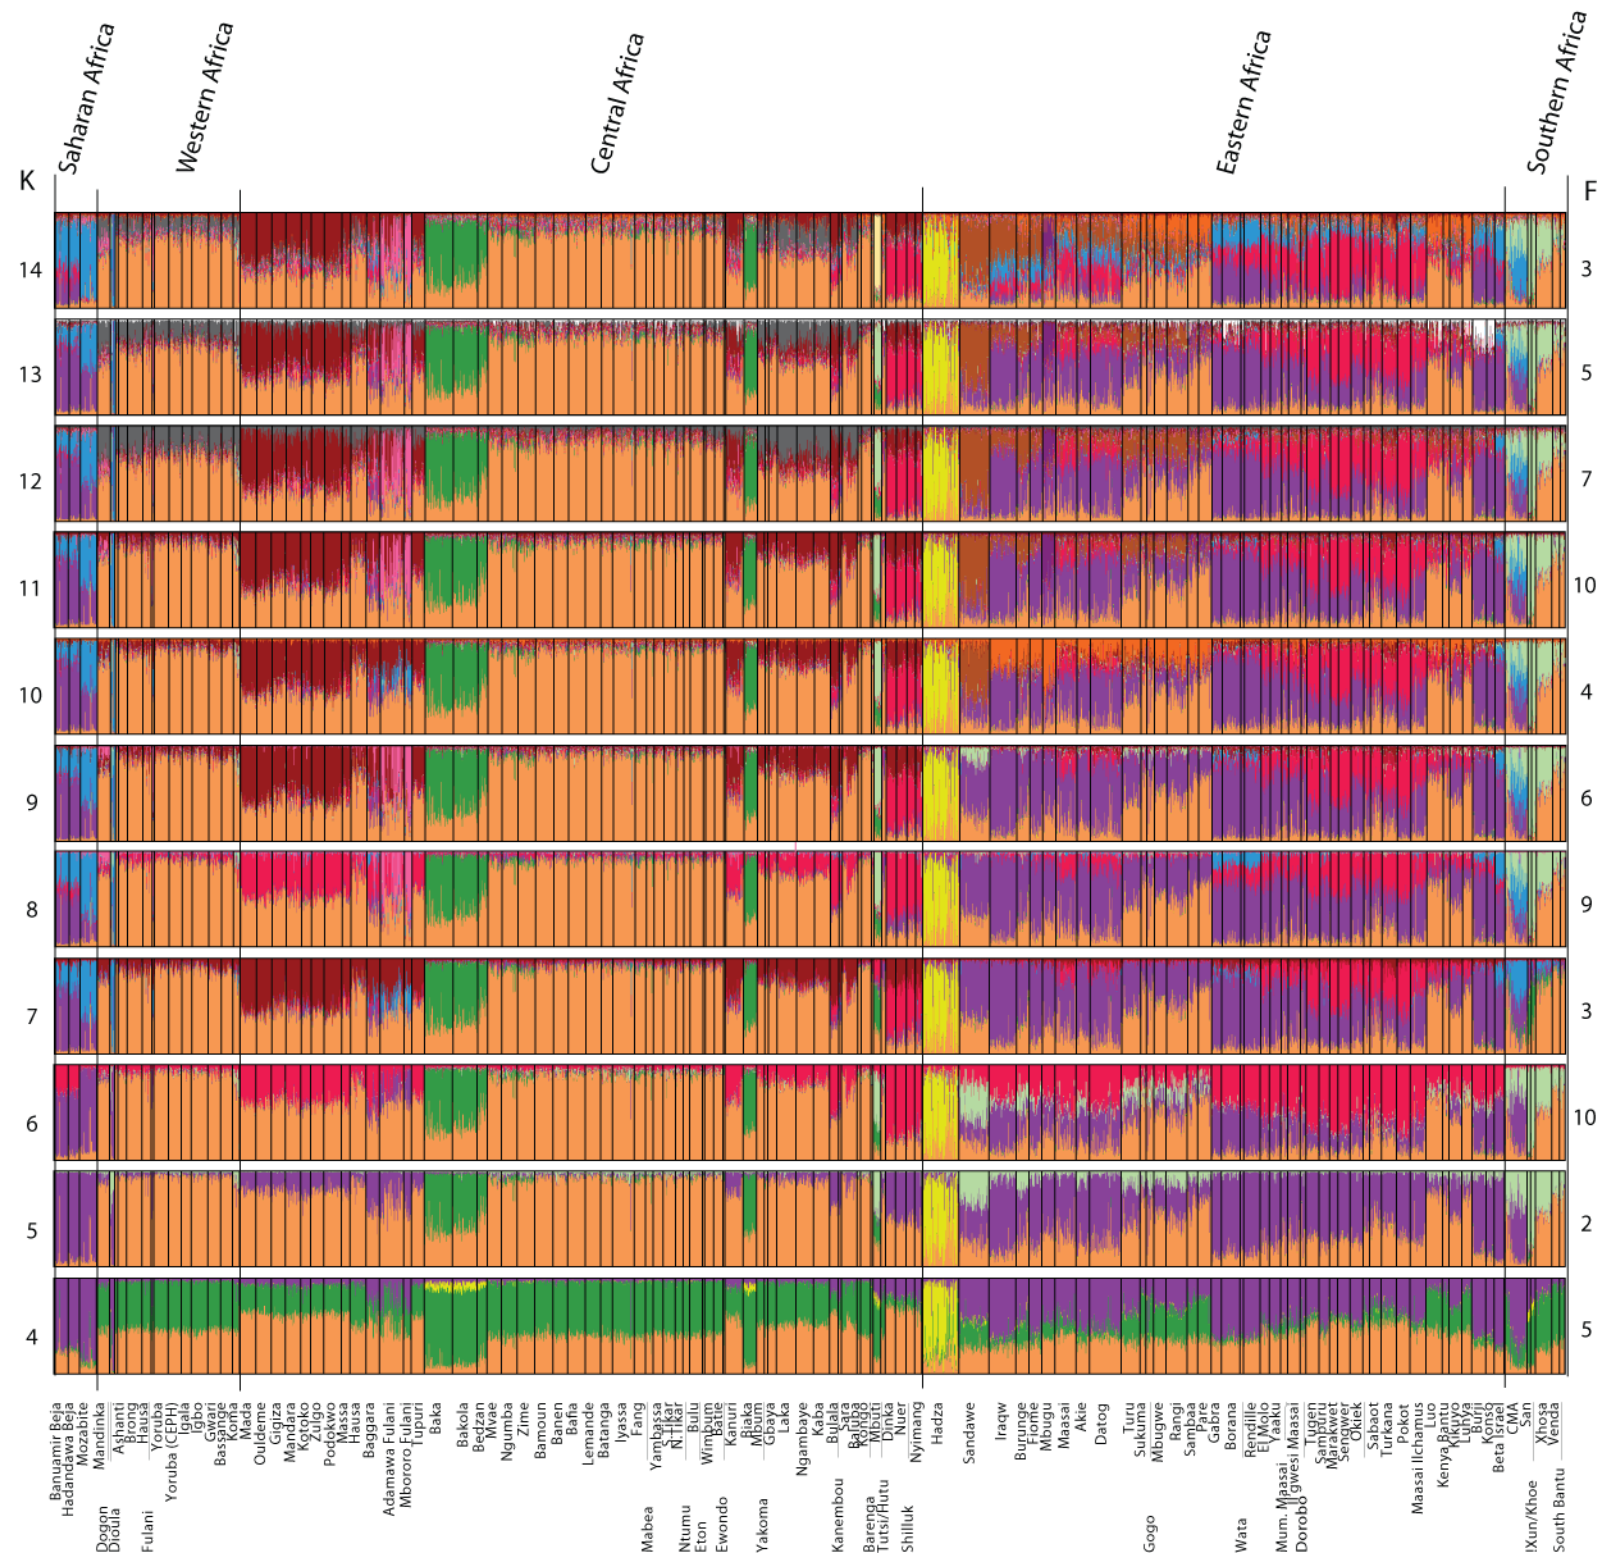

**Figure S16:** Secondary Modes for STRUcTURE for K = 4 – 14 for the African population dataset. Values for K are shown on the left and the number of similar runs (F) for the primary mode for each set of 25 STRUcTURE runs at each K value is shown on the right.

# Africa

a)

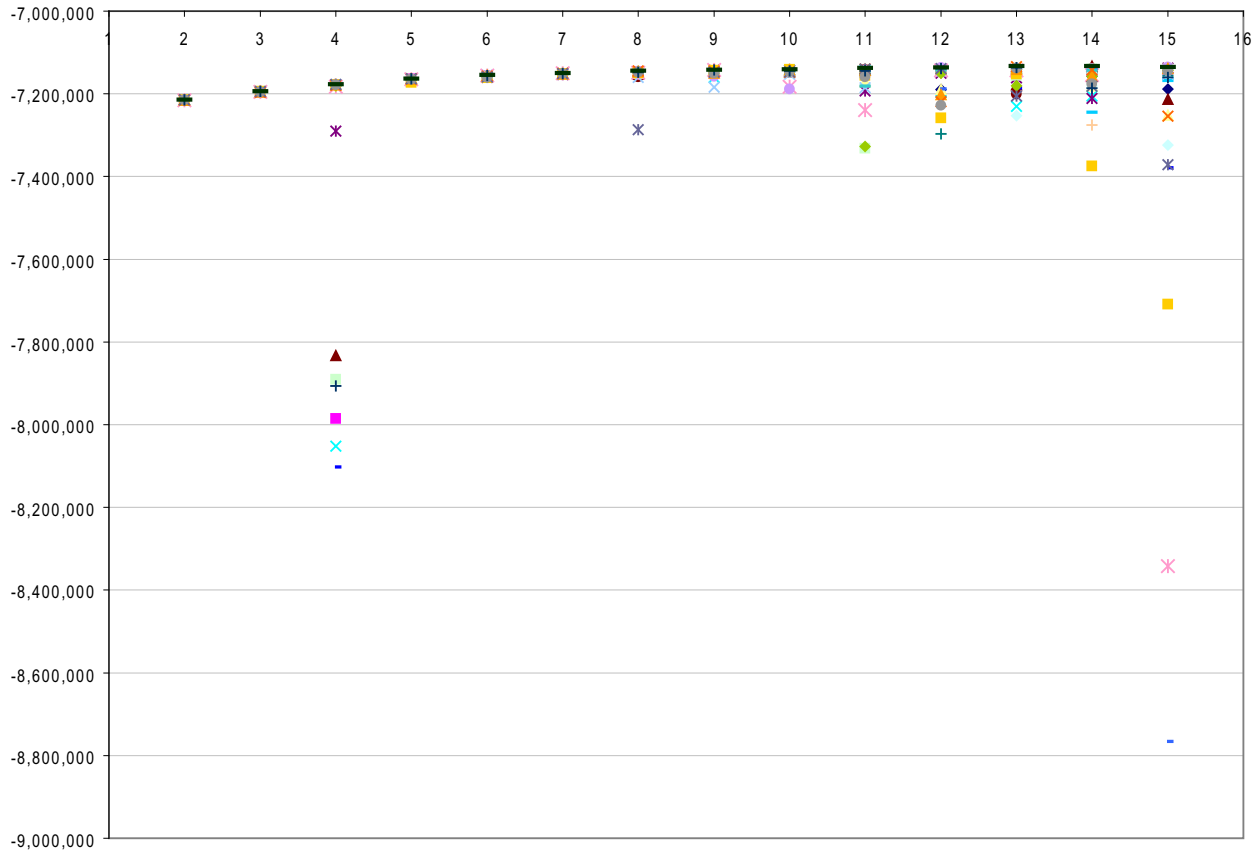

b)

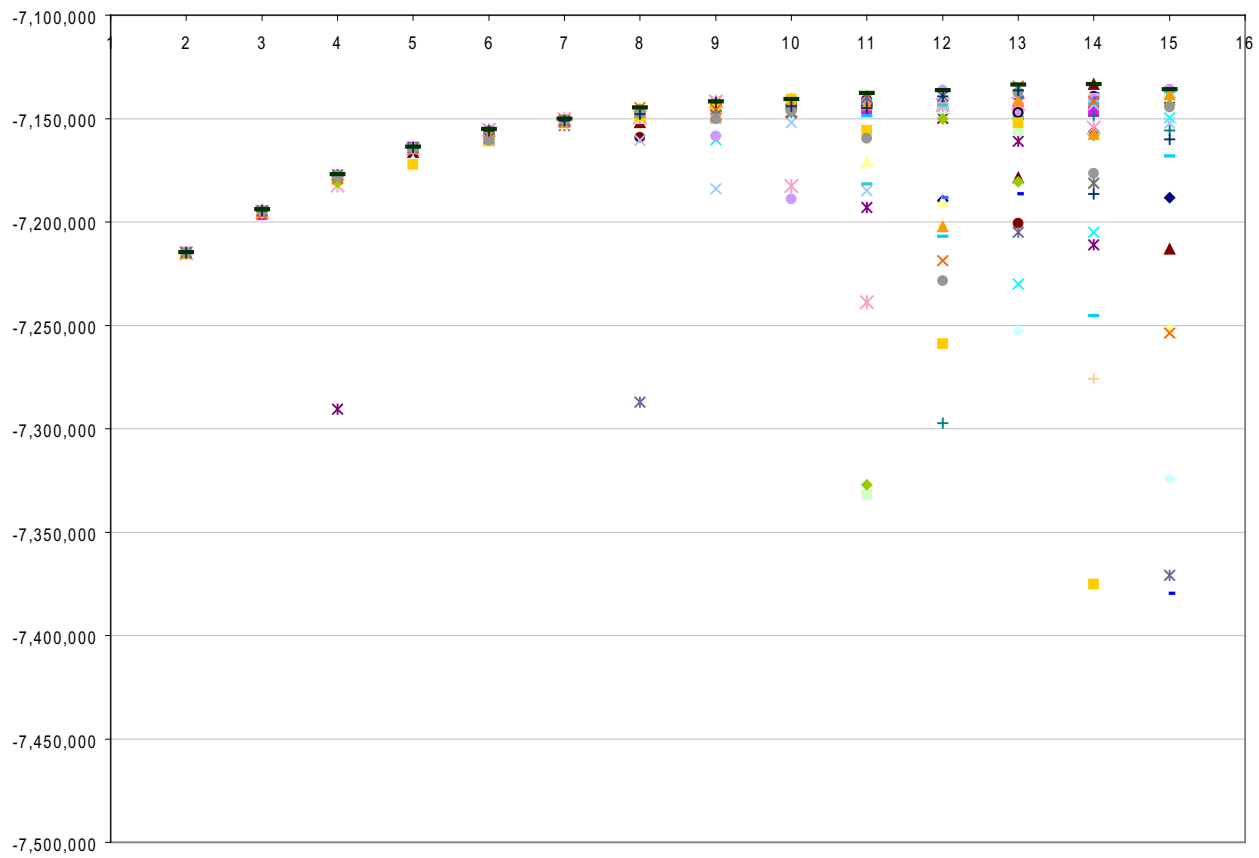

**Figure S17:** Likelihood scores for 25 STRUCTURE runs for African populations for K = 2 - 15. (a) results for all runs (b) results after removing outliers and rescaling the Y axis.

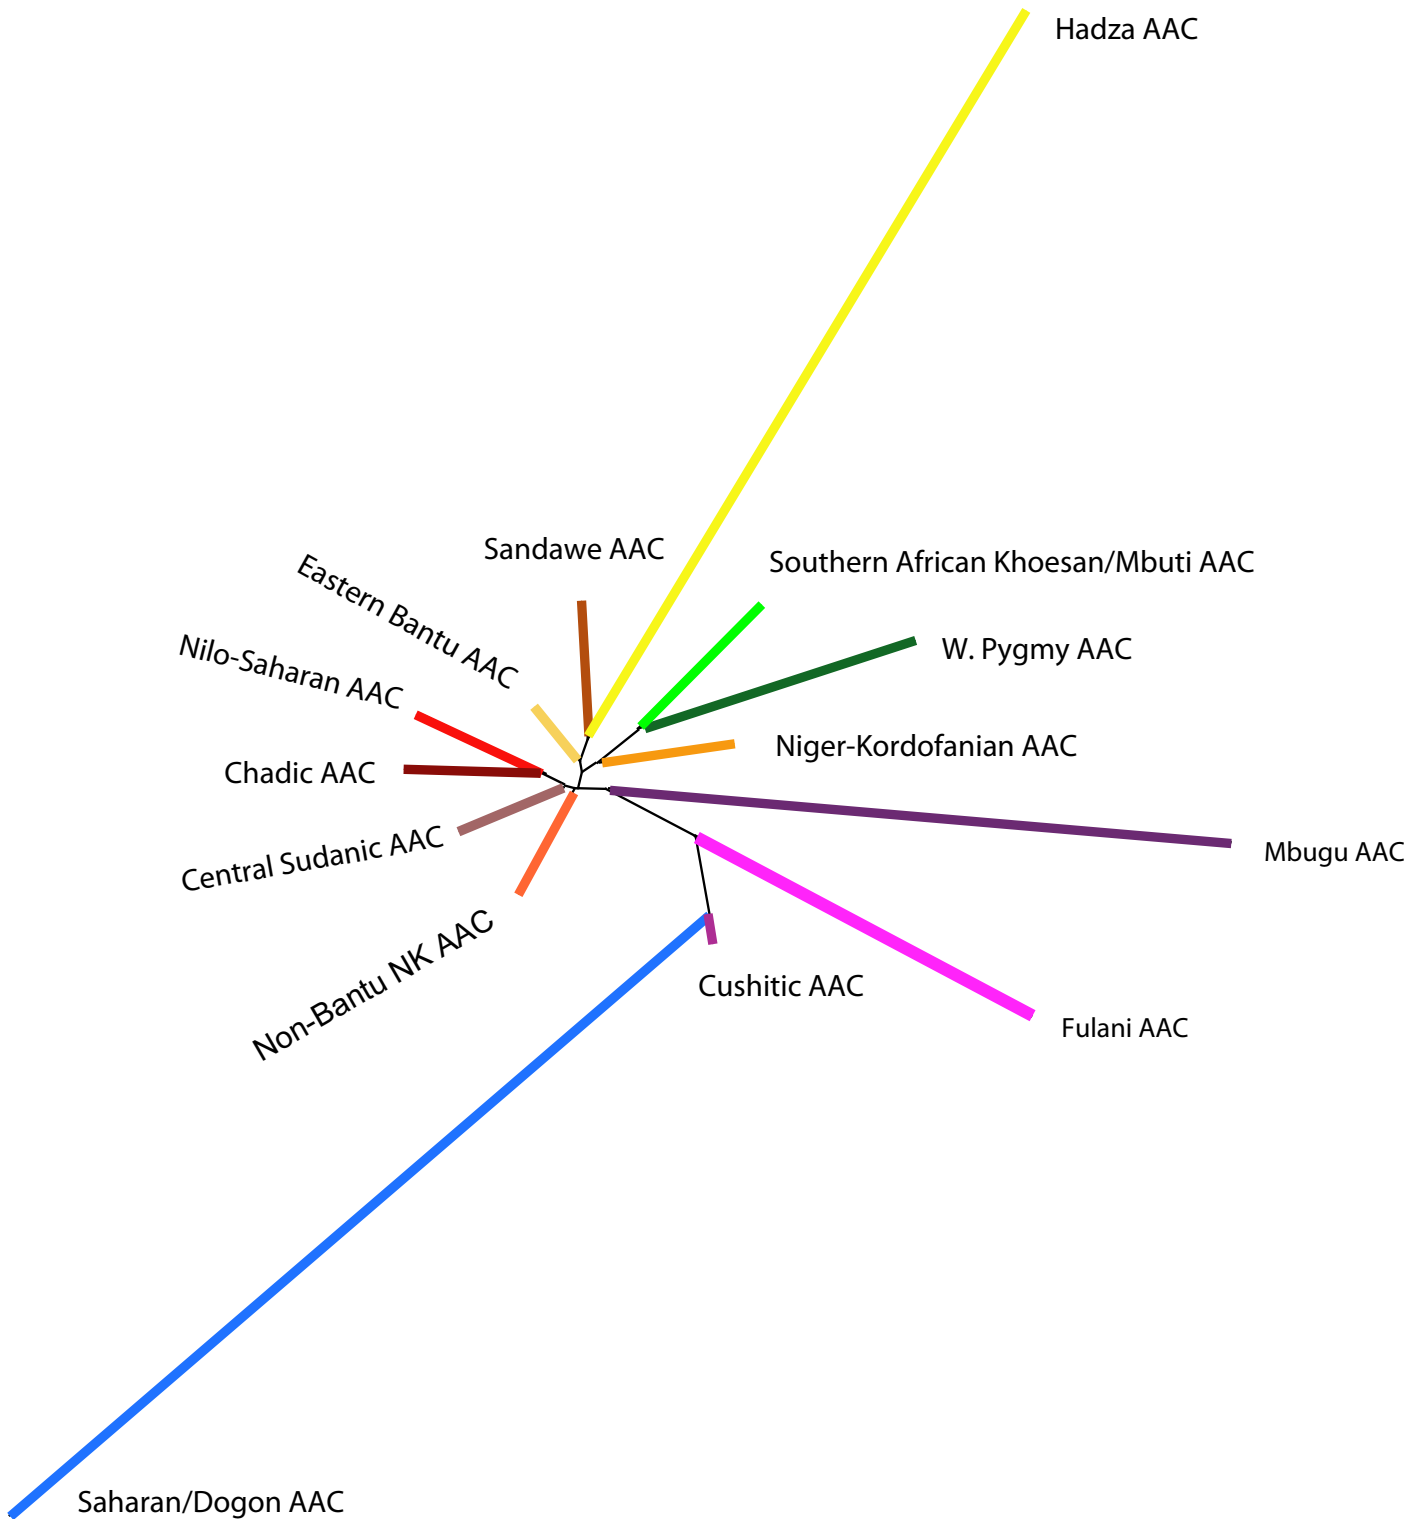

**Figure S18:** Un-rooted neighbor-joining tree from pairwise net nucleotide genetic distances calculated from the inferred ancestral allele frequencies at  $K = 14$  from STRUCTURE analysis of the African dataset. Major clades observed in the tree include the North African/Dogon, Fulani, Cushitic, and Mbugu AACs, the SAK-Mbuti Pygmy and W. Pygmy AACs, and the Hadza and Sandawe AACs. The Nilo-Saharan and Chadic-Saharan AAC form a sister group and cluster with the Central Sudanic AAC. The Bantu AACs radiate from the center of the tree

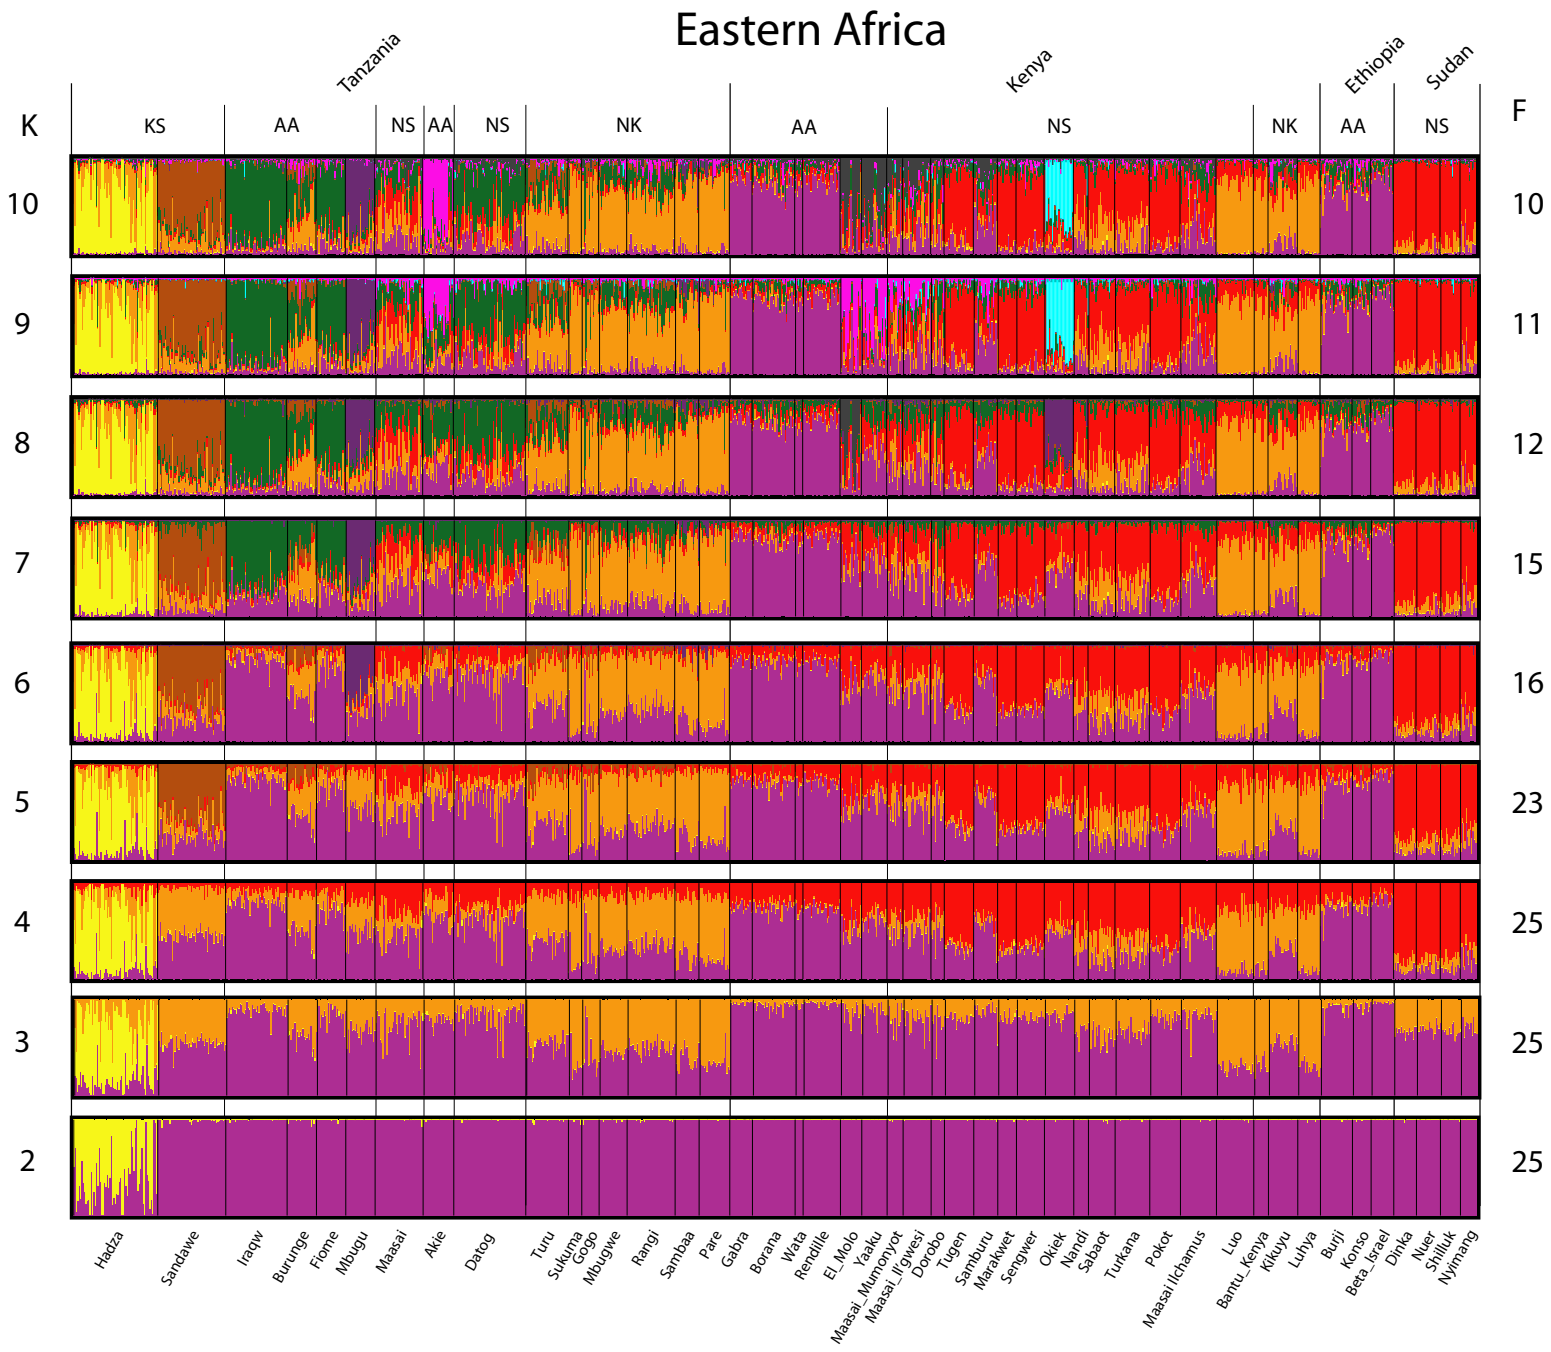

**Figure S19:** Results of STRUCTURE analysis for Eastern Africa at K = 2 -10. Values for K are shown on the left and the number of similar runs (F) for the primary mode for each set of 25 STRUCTURE runs at each K value is shown on the right.



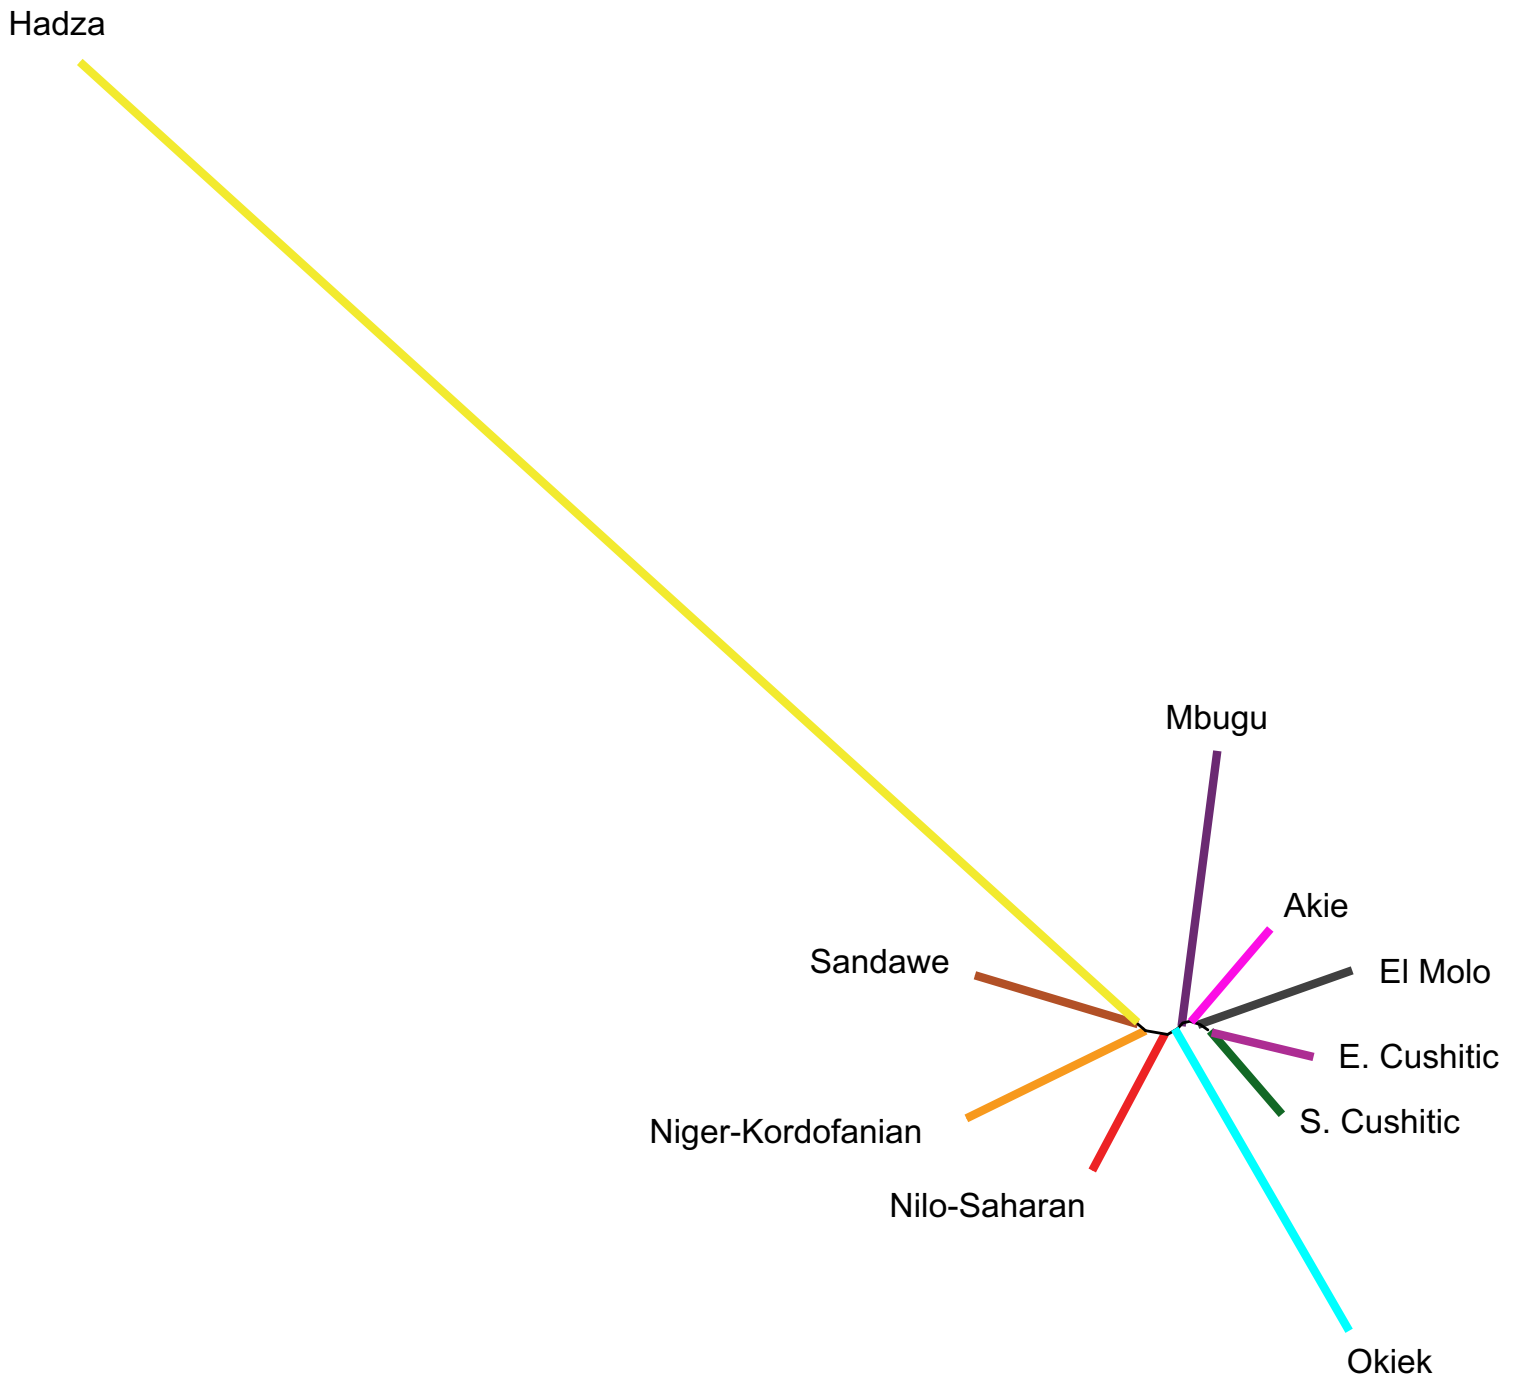

**Figure S21:** Un-rooted neighbor-joining tree from pairwise net nucleotide genetic distances calculated from the inferred ancestral allele frequencies for clusters at  $K = 10$  with STRUCTURE analysis of the Eastern African dataset

## Saharan Africa

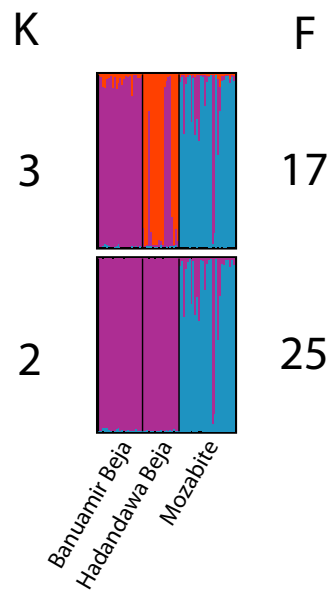

**Figure S22:** Results of STRUCTURE analysis for Saharan Africa at  $K = 2 - 3$ . Values for  $K$  are shown on the left and the number of similar runs ( $F$ ) for the primary mode for each set of 25 STRUCTURE runs at each  $K$  value is shown on the right.

# Saharan Africa

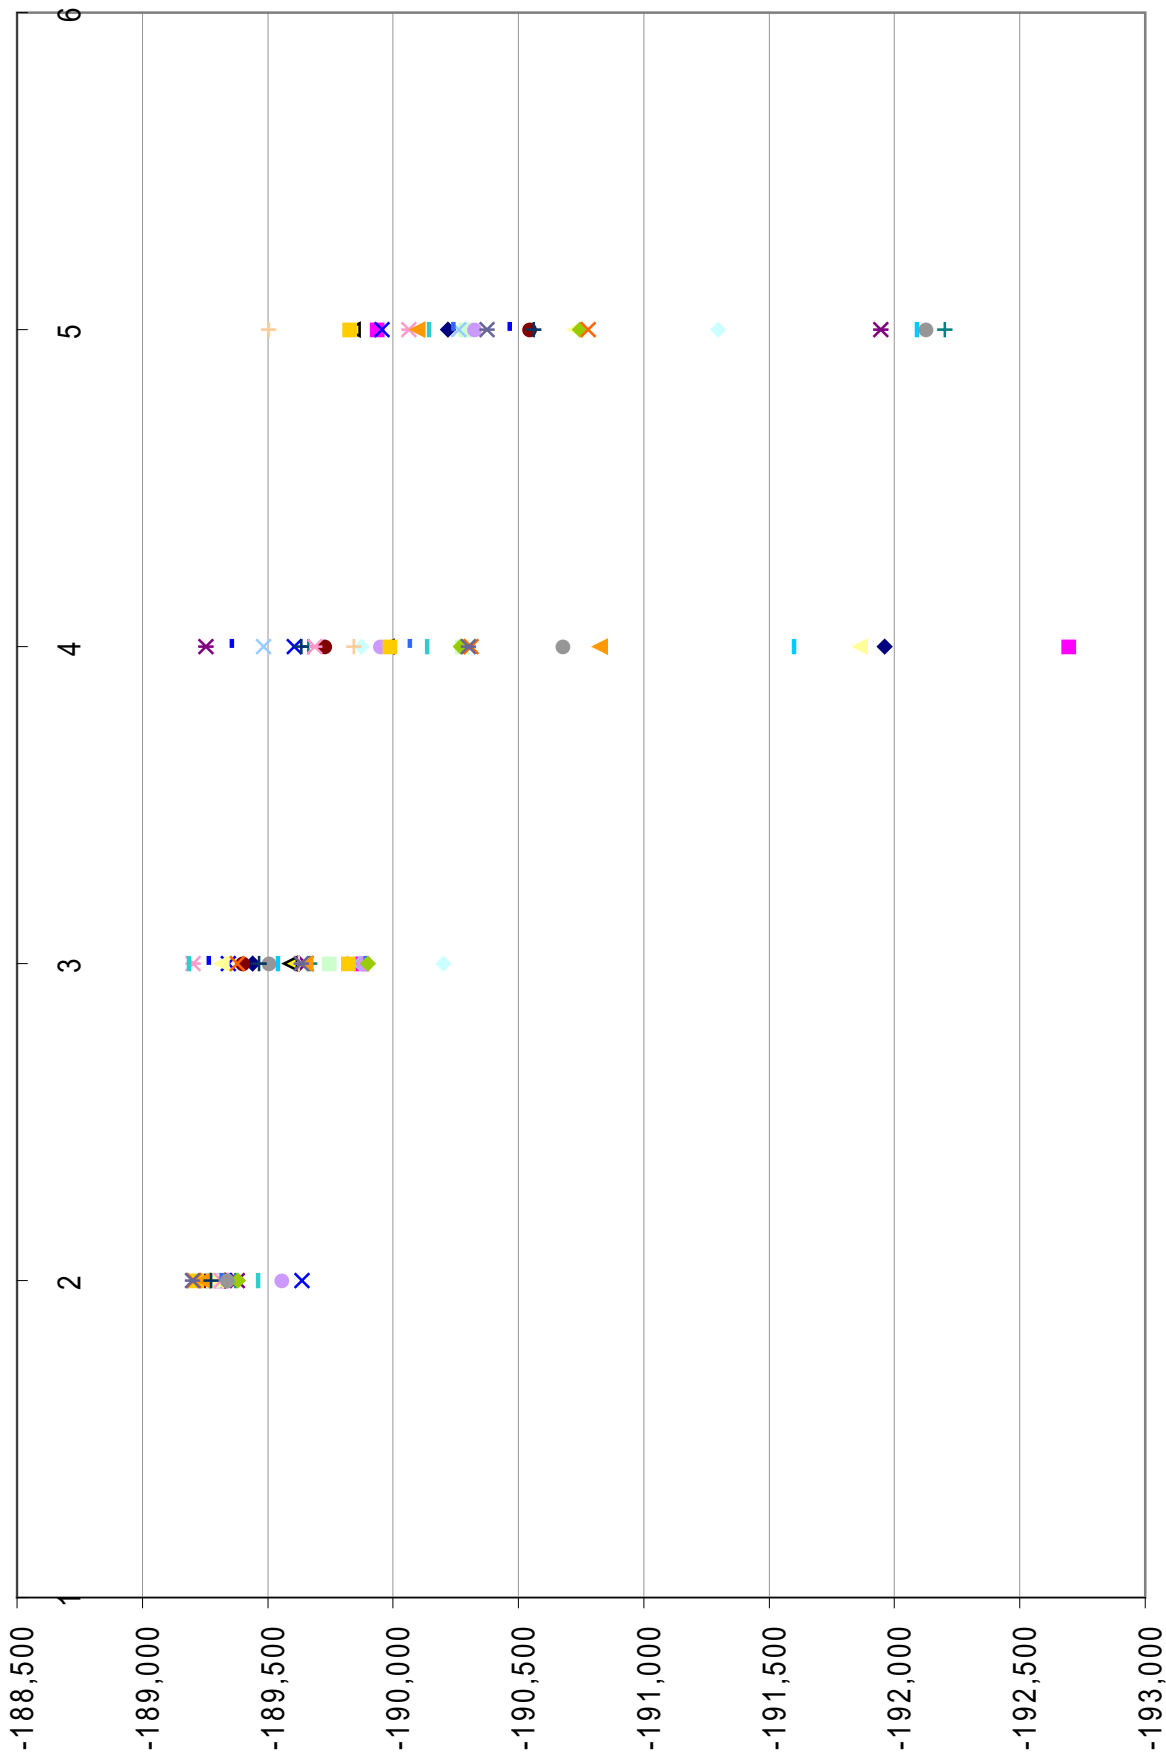

**Figure S23:** Likelihood scores for 25 STRUCTURE runs for Saharan African populations for K = 2 - 5.



# Central Africa

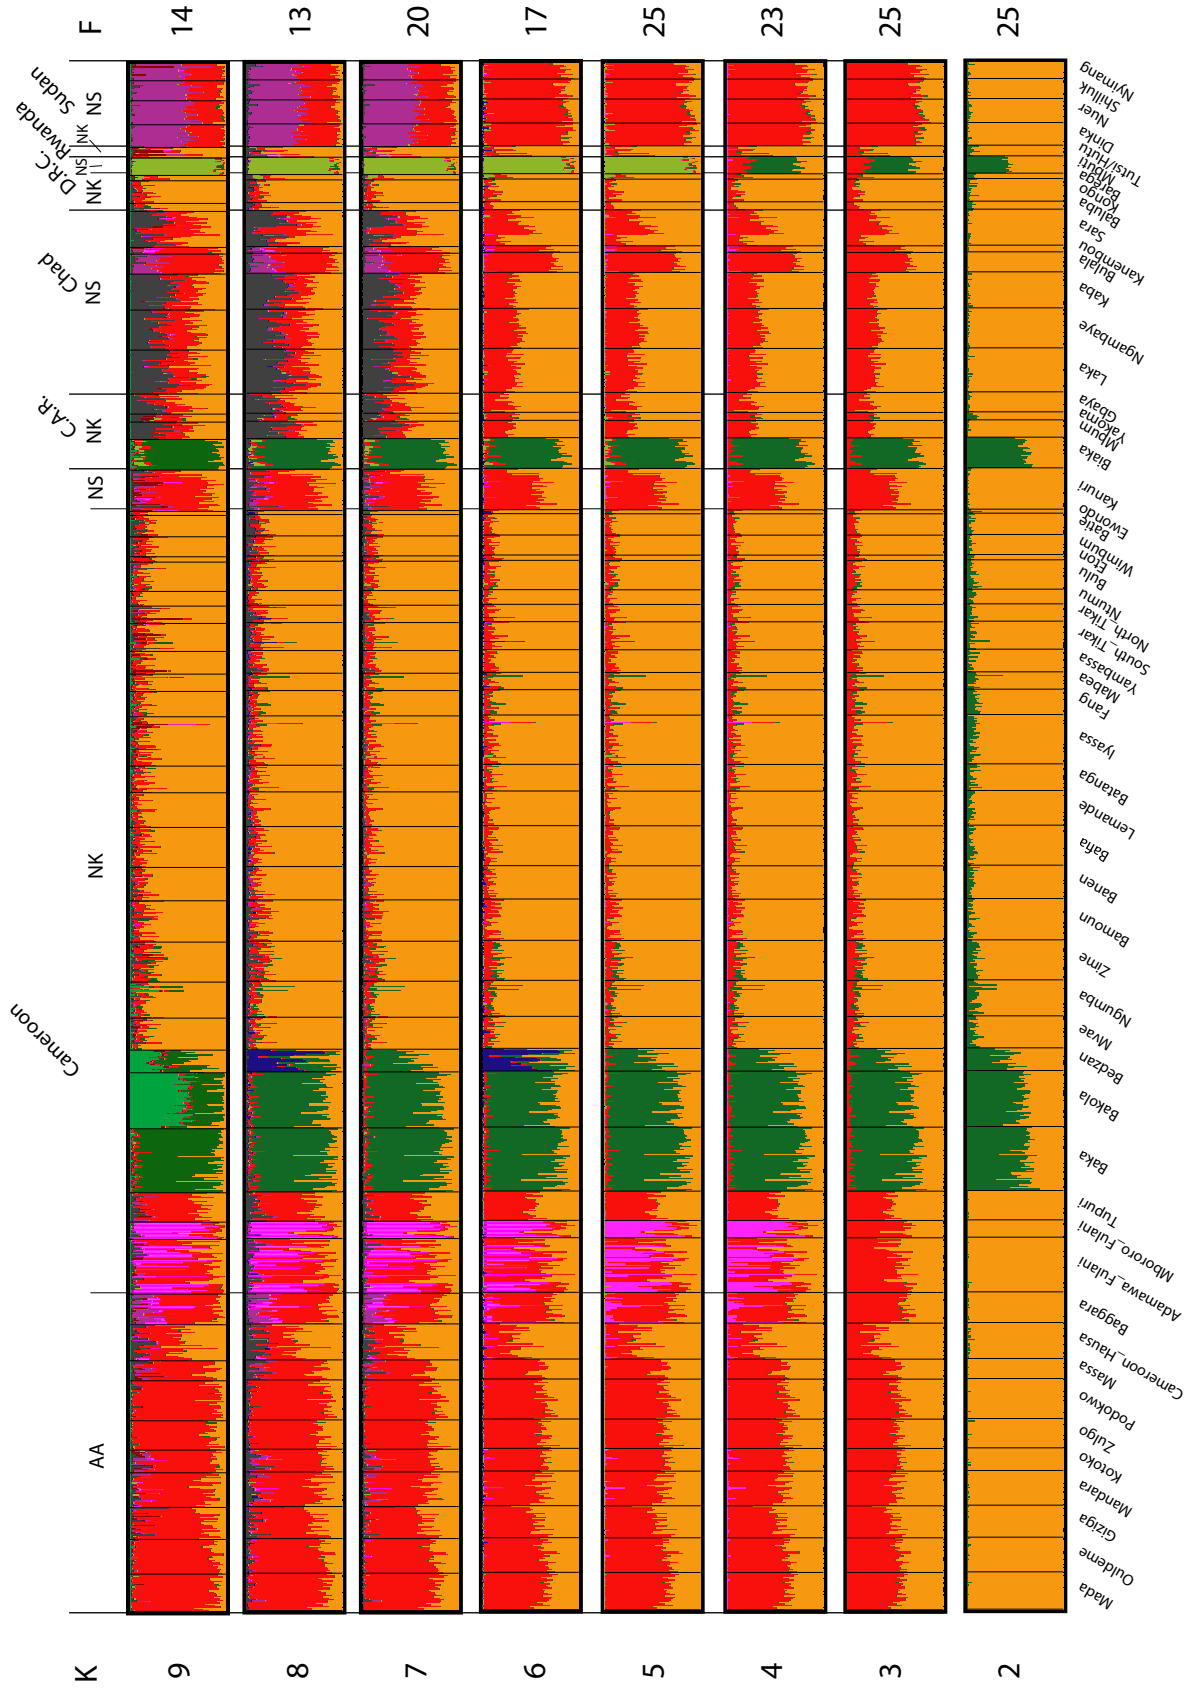

**Figure S24:** Results of STRUCTURE analysis for Central Africa at  $K = 2 - 9$ . Note that the southern Sudanese are included in these analyses because of shared ancestral clusters as inferred on the basis of analyses of the global and African datasets. Values for K are shown on the left and the number of similar runs (F) for the primary mode for each set of 25 STRUCTURE runs at each K value is shown on the right.

# Central Africa

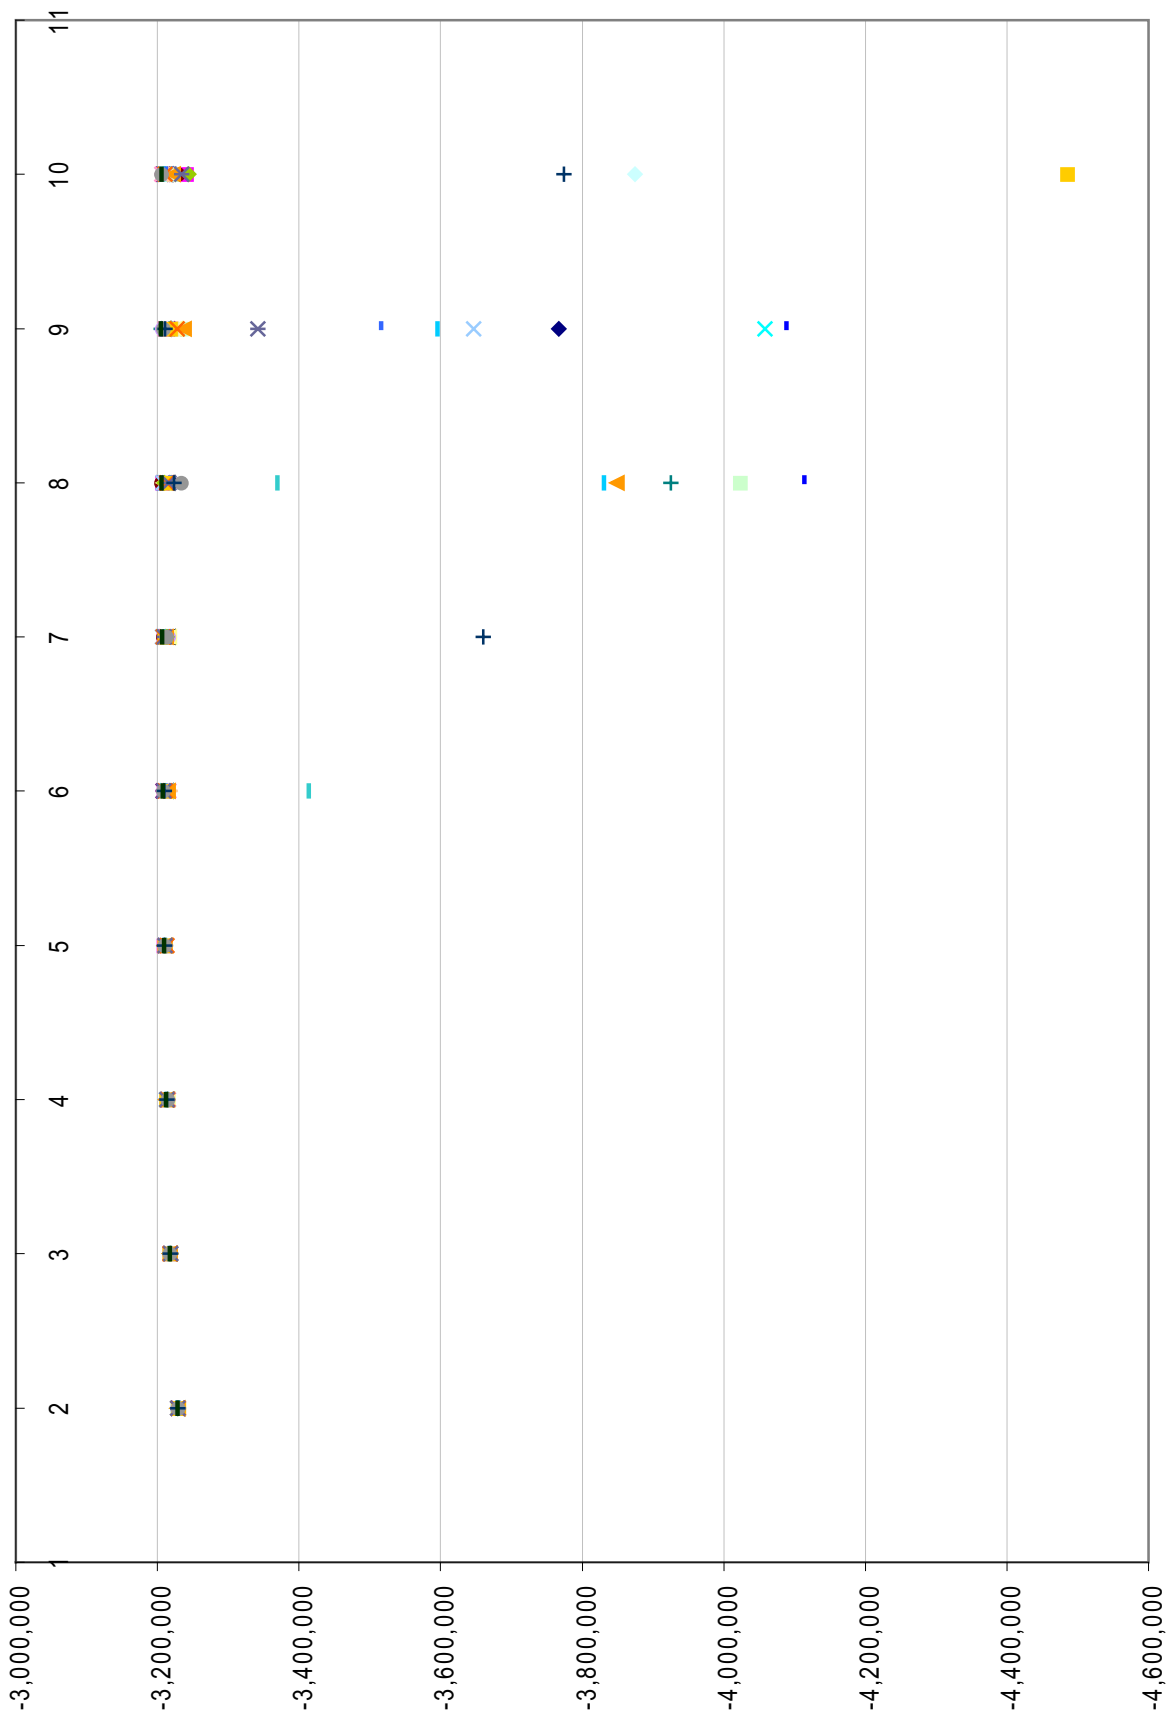

**Figure S25:** Likelihood scores for 25 STRUCTURE runs for Central African populations for  $K = 2 - 10$ .

# Western Africa

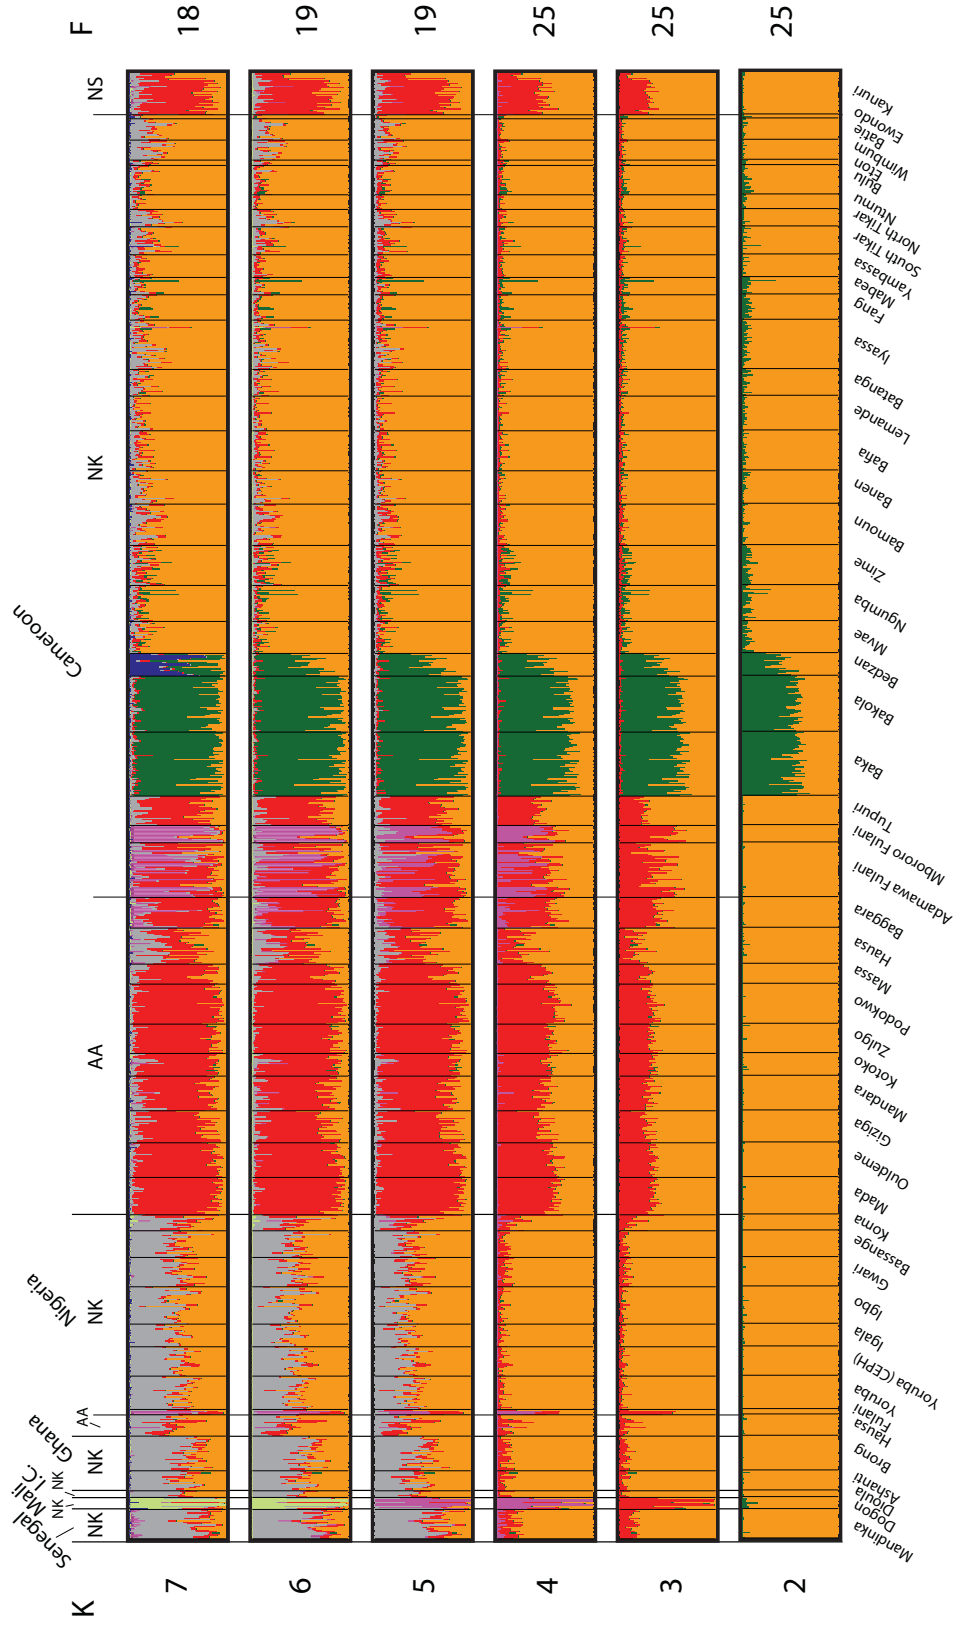

**Figure S26:** Results of STRUCTURE analysis for Western Africa at  $K = 2 - 7$ . Note that the southern Cameroon populations are included because of shared ancestral clusters as inferred from analyses of the global and African datasets and to distinguish subtle substructure between Bantu and non-Bantu Niger-Kordofanian speakers. Values for  $K$  are shown on the left and the number of similar runs (F) for the primary mode for each set of 25 STRUCTURE runs at each  $K$  value is shown on the right.

# Western Africa

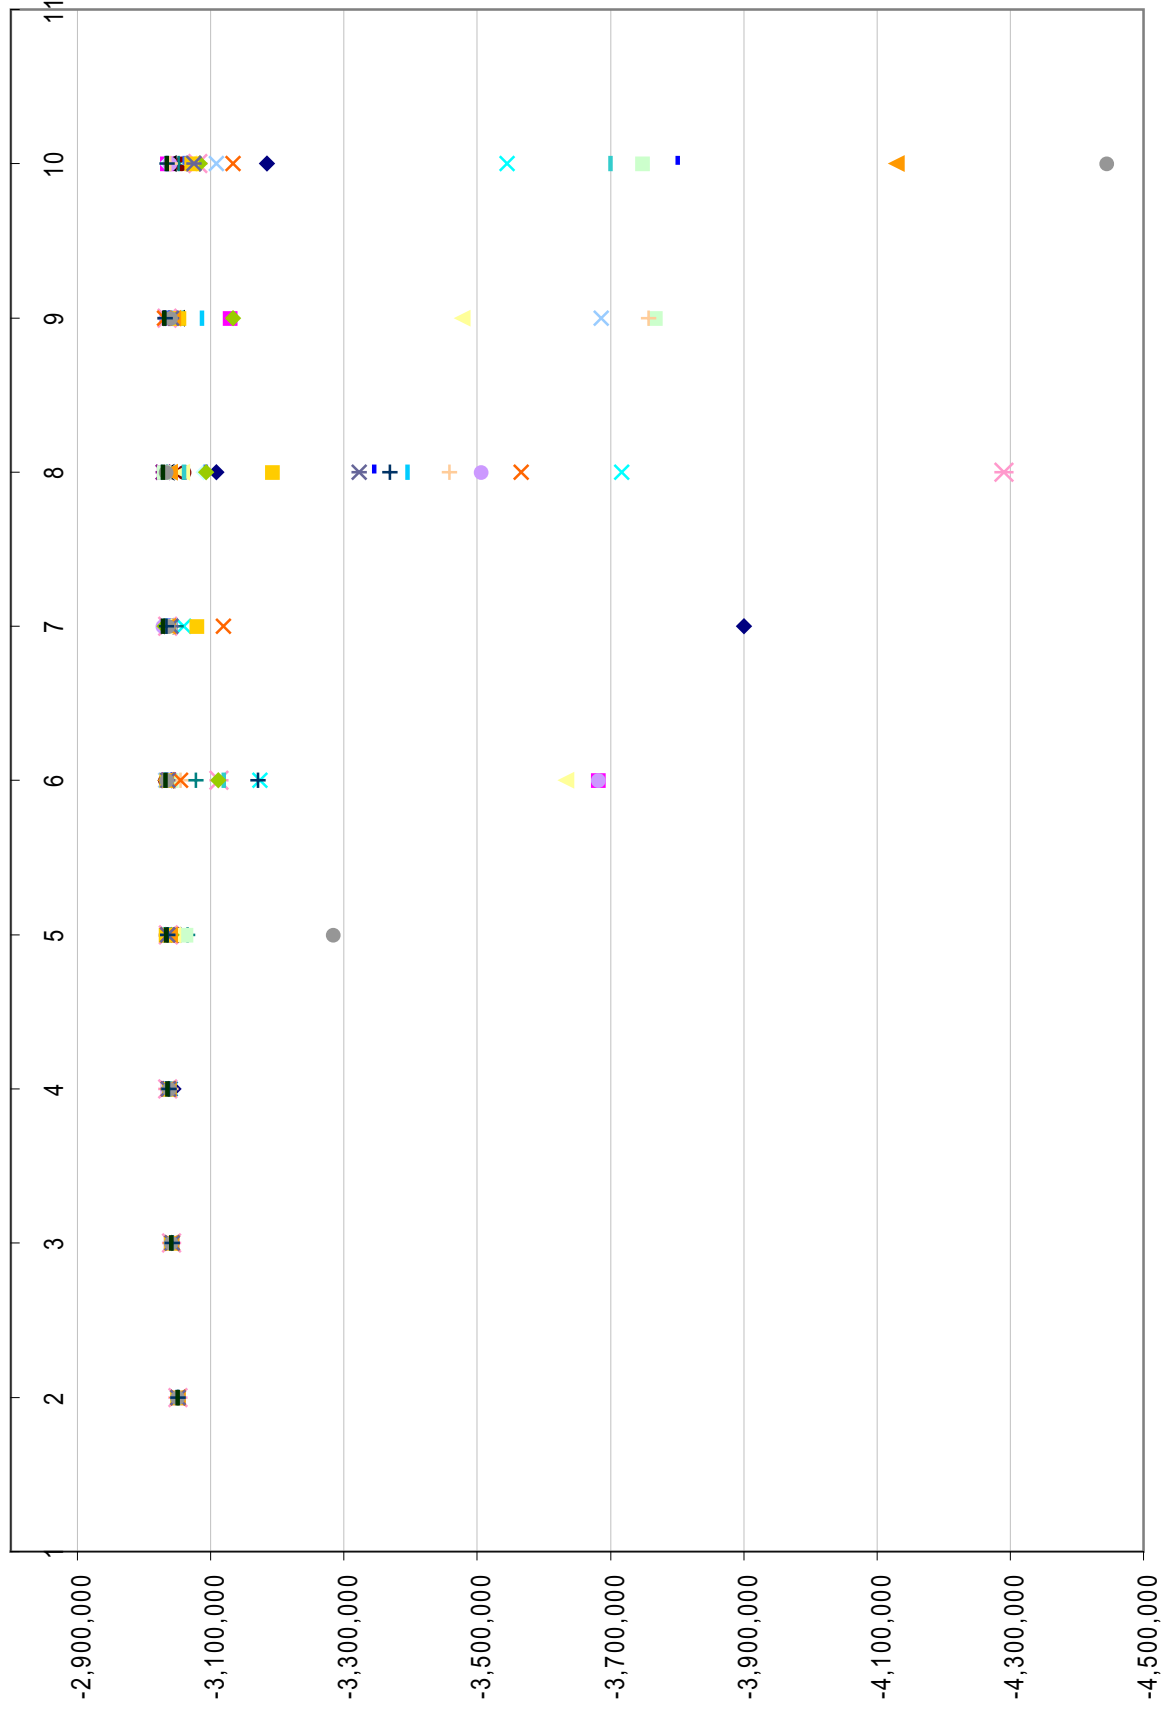

**Figure S27:** Likelihood scores for 25 STRUCTURE runs for Western African populations for K = 2 - 10.

## Southern Africa

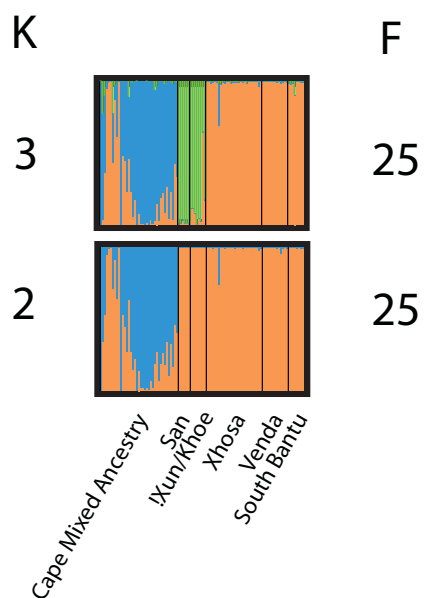

**Figure S28:** Results of STRUCTURE analysis for Southern Africa at  $K = 2 - 3$ . Values for  $K$  are shown on the left and the number of similar runs ( $F$ ) for the primary mode for each set of 25 STRUCTURE runs at each  $K$  value is shown on the right.

# Southern Africa

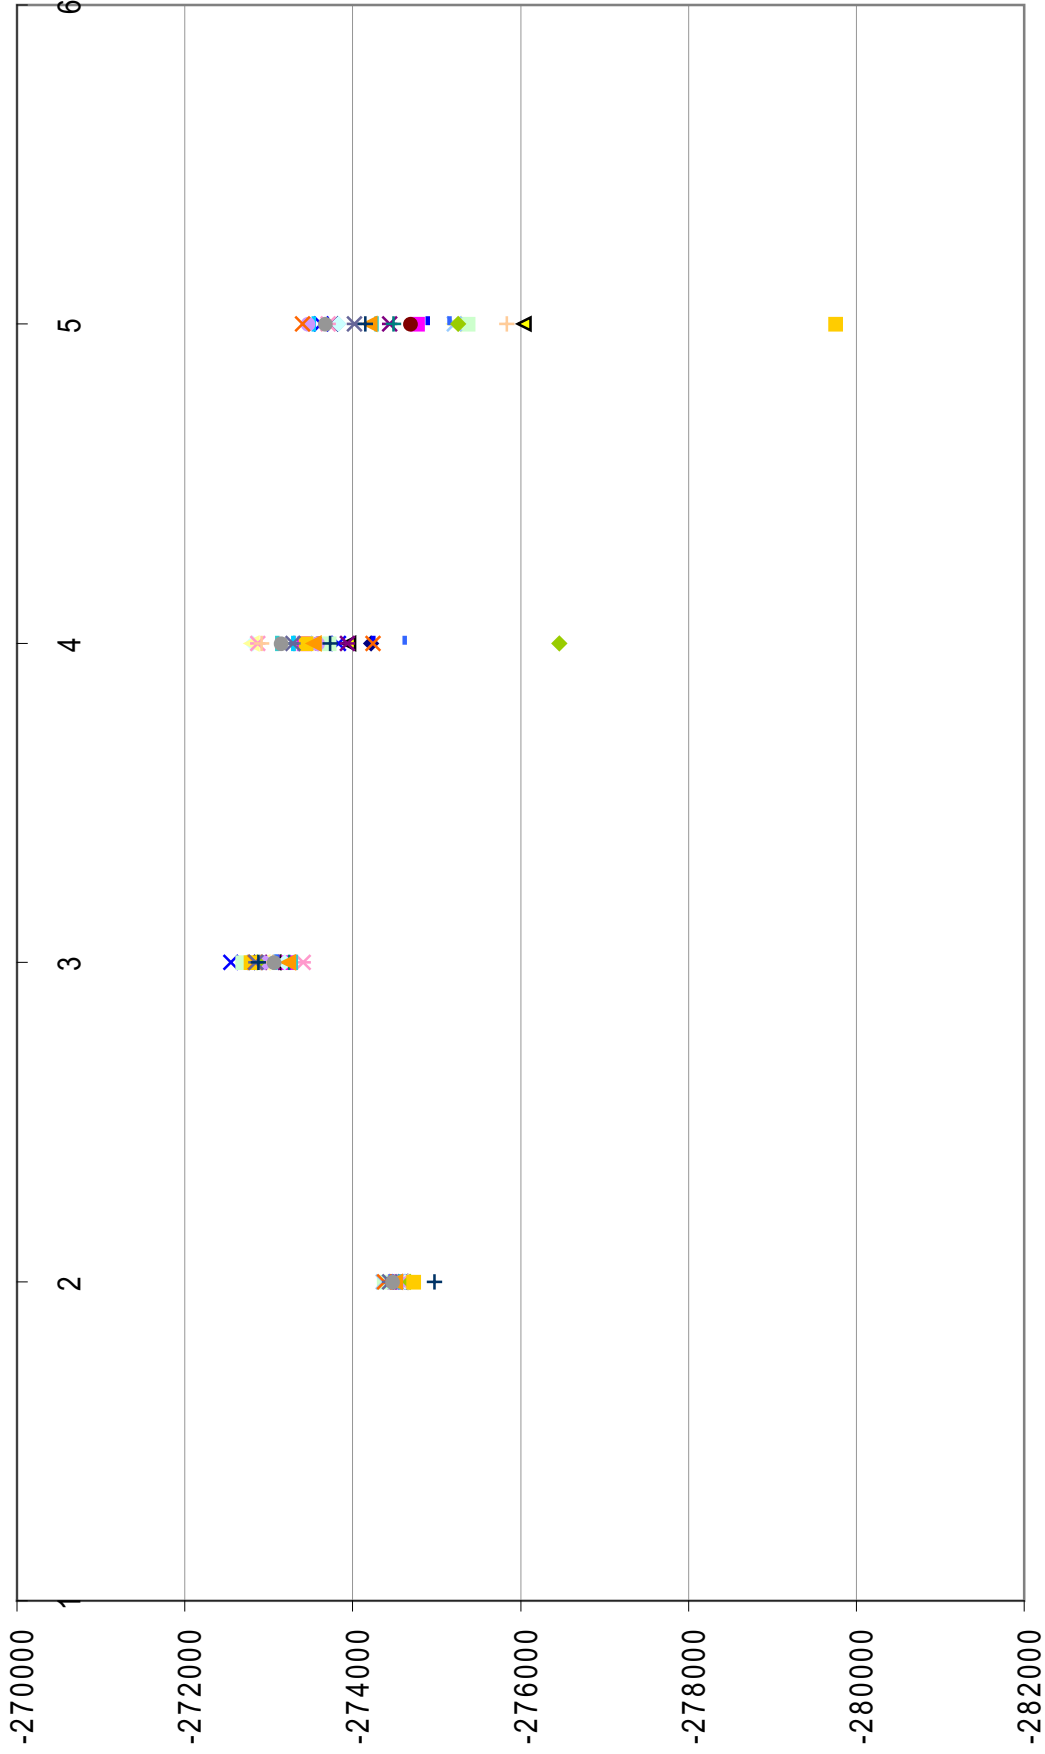

**Figure S29:** Likelihood scores for 25 STRUSTRUCTURE runs for Southern African populations for  $K = 2 - 5$ .

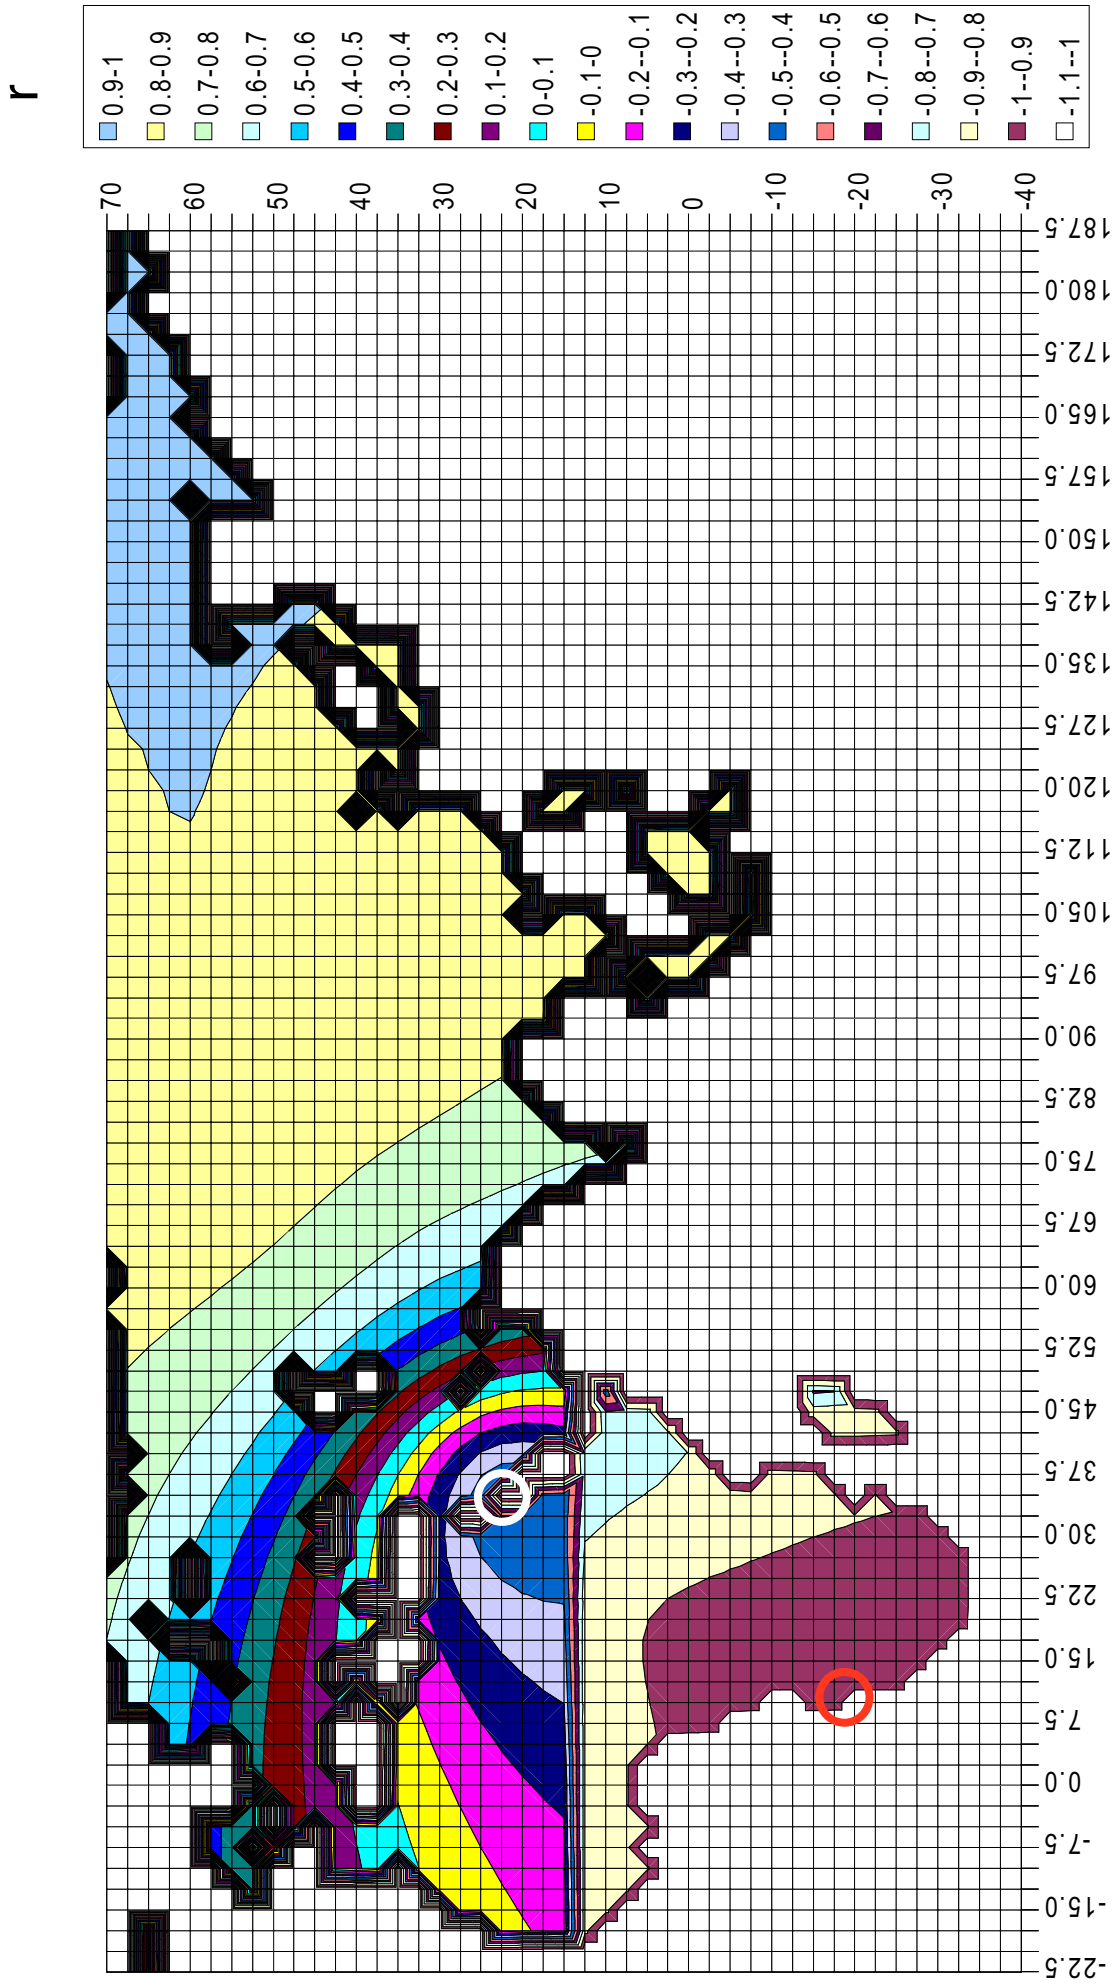

**Figure S30:** The geographic origin of modern humans and the route of migration out of Africa estimated under a serial founder effect model (S31). This inference was based on the geographic position of sampled populations and the correlation between estimated levels of genetic diversity for each population and estimated distance from the origin ( $r$ ). The red circle indicates the inferred origin of migration within Africa and white circle indicates the inferred waypoint out of Africa

**A**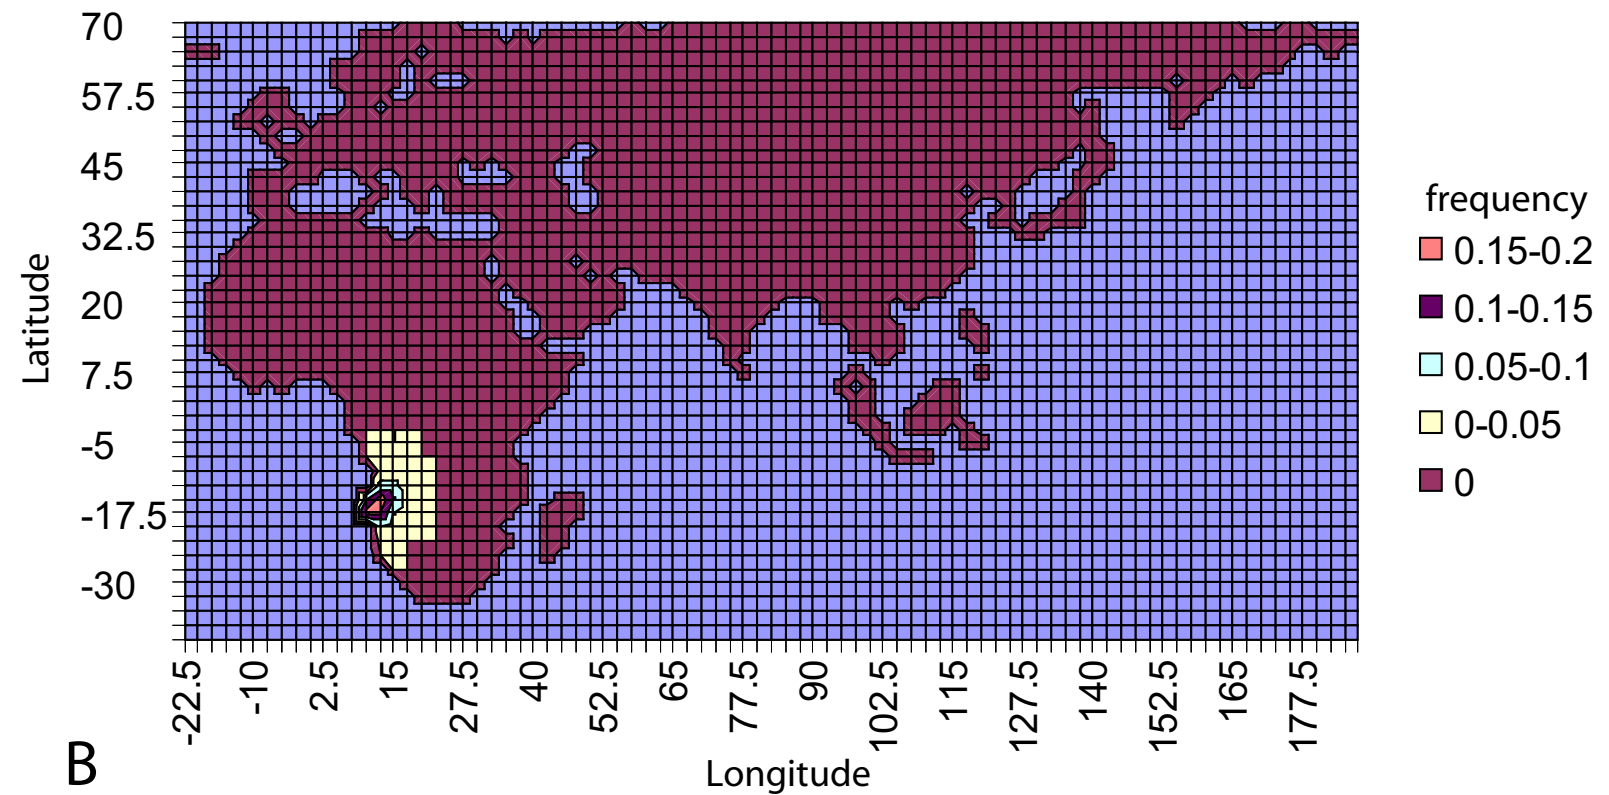**B**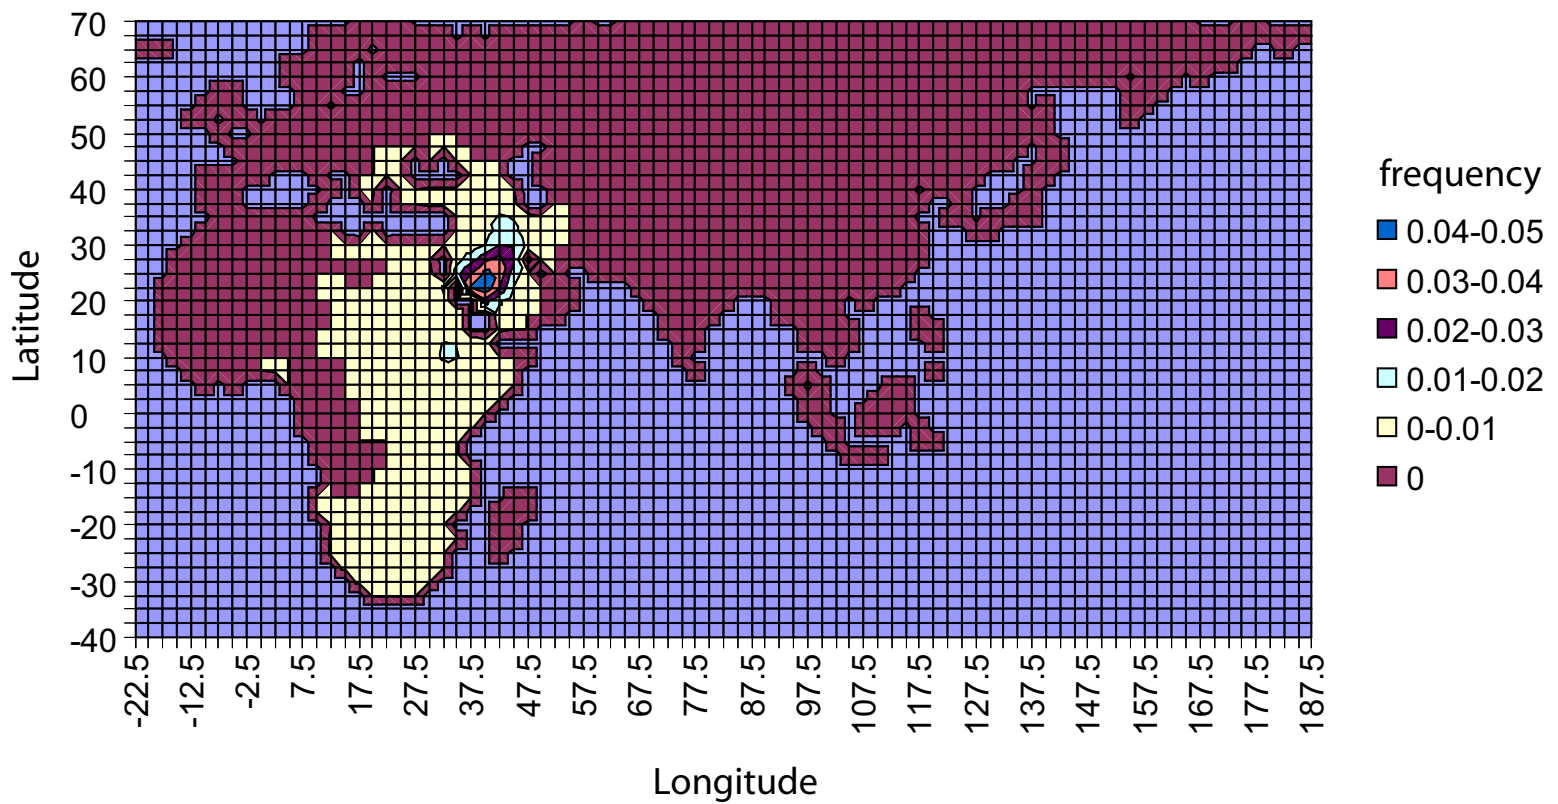

**Figure S31:** Results of Bootstrap analyses used to infer origin and waypoint of migration of modern humans within and out of Africa. For each grid point the frequency of replicates that fall upon that point is indicated. A) Bootstrap results for origin analysis; B) Bootstrap results for waypoint analysis.



a)

**DEEP BRANCHING OF KHOISAN, UNDIFFERENTIATED**

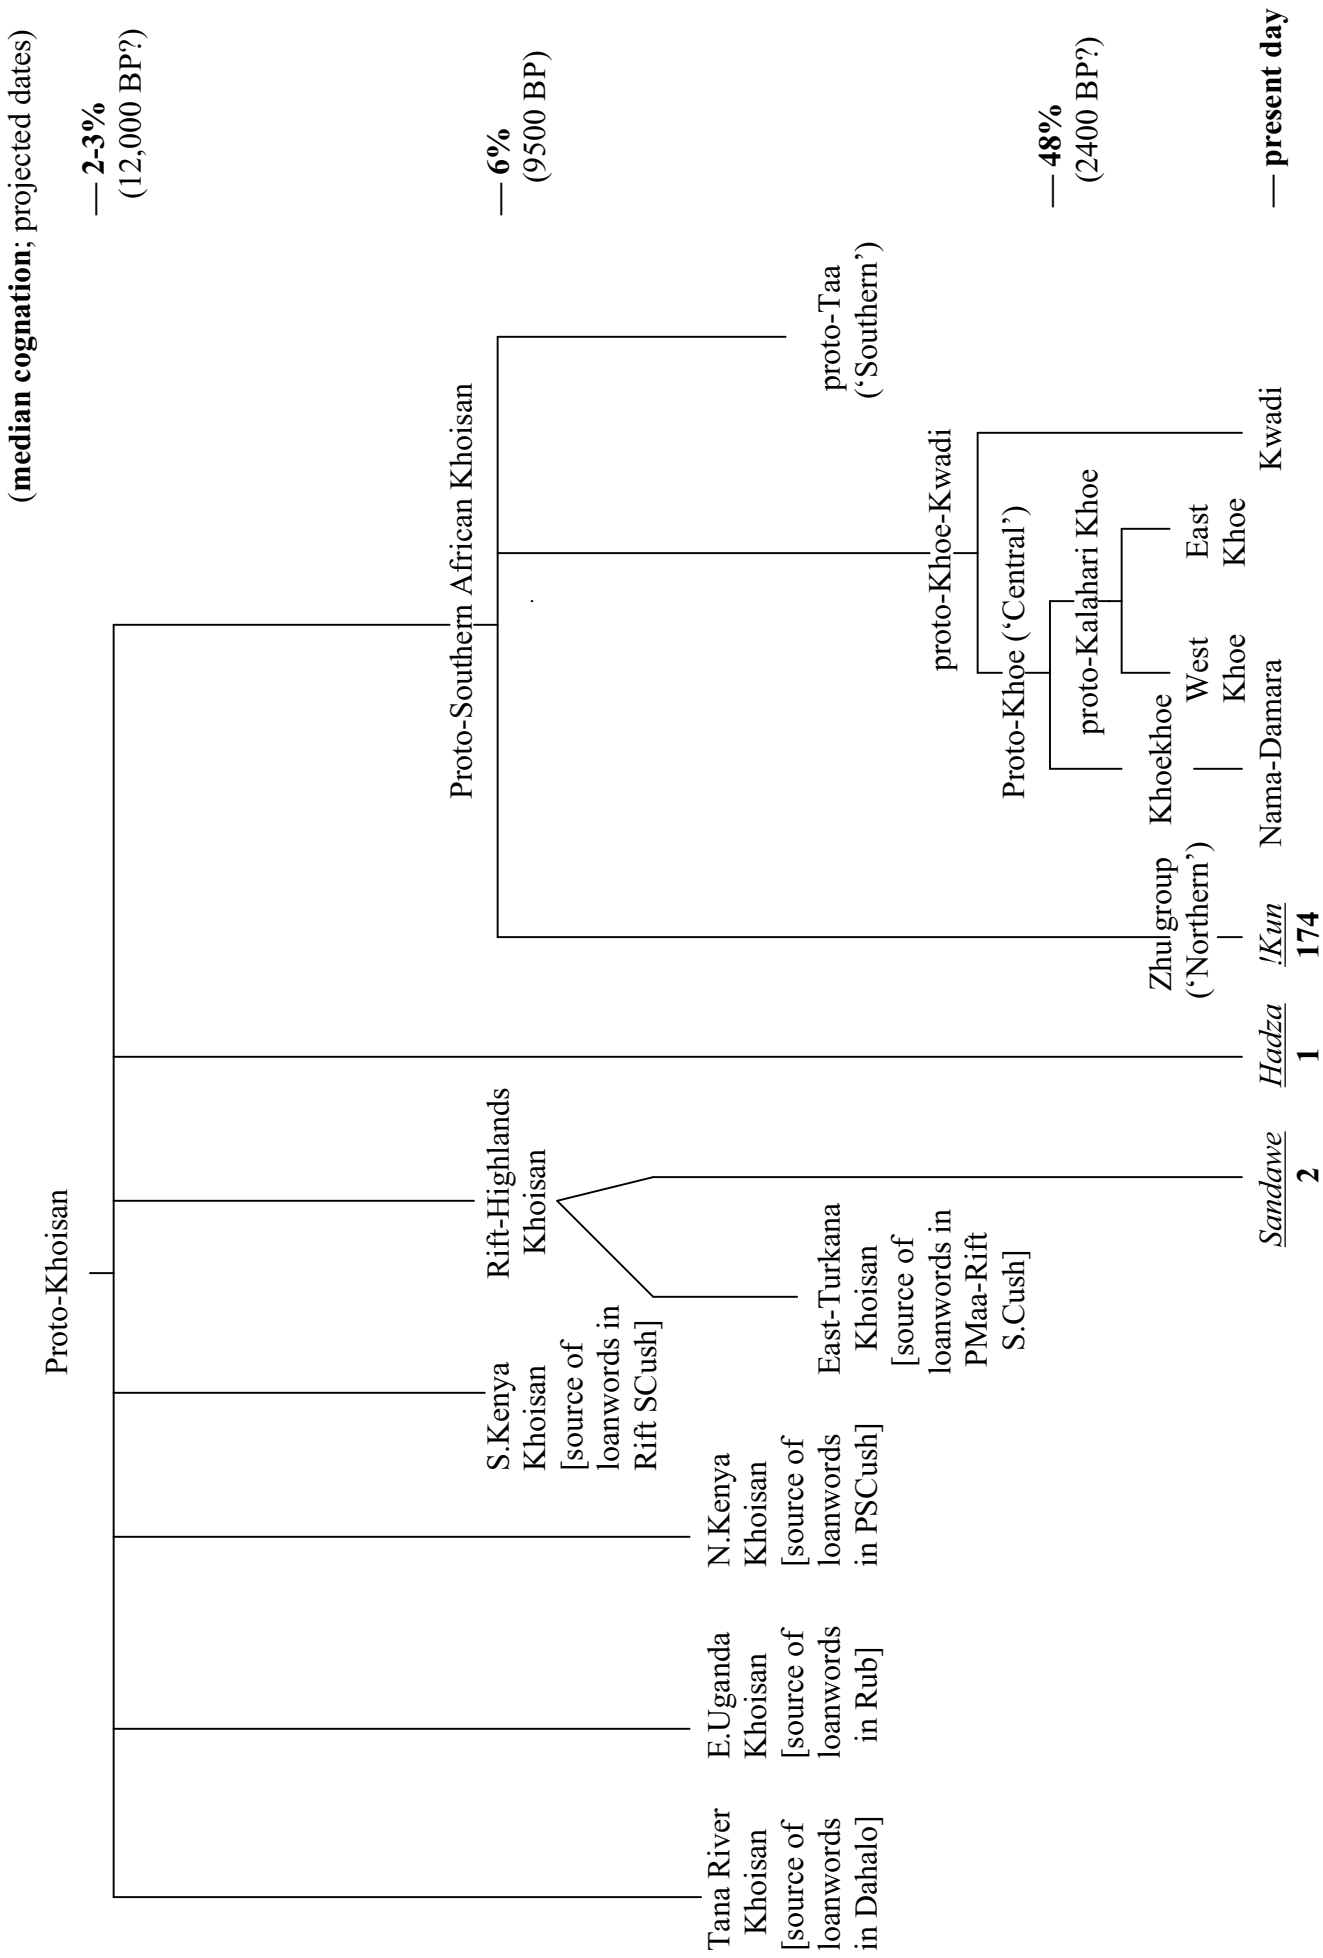

Figure S32a



C)

(Niger-Kordofanian tree precedes here)

**EASTERN BENUE-CONGO STRATIGRAPHY**

(median cognation)

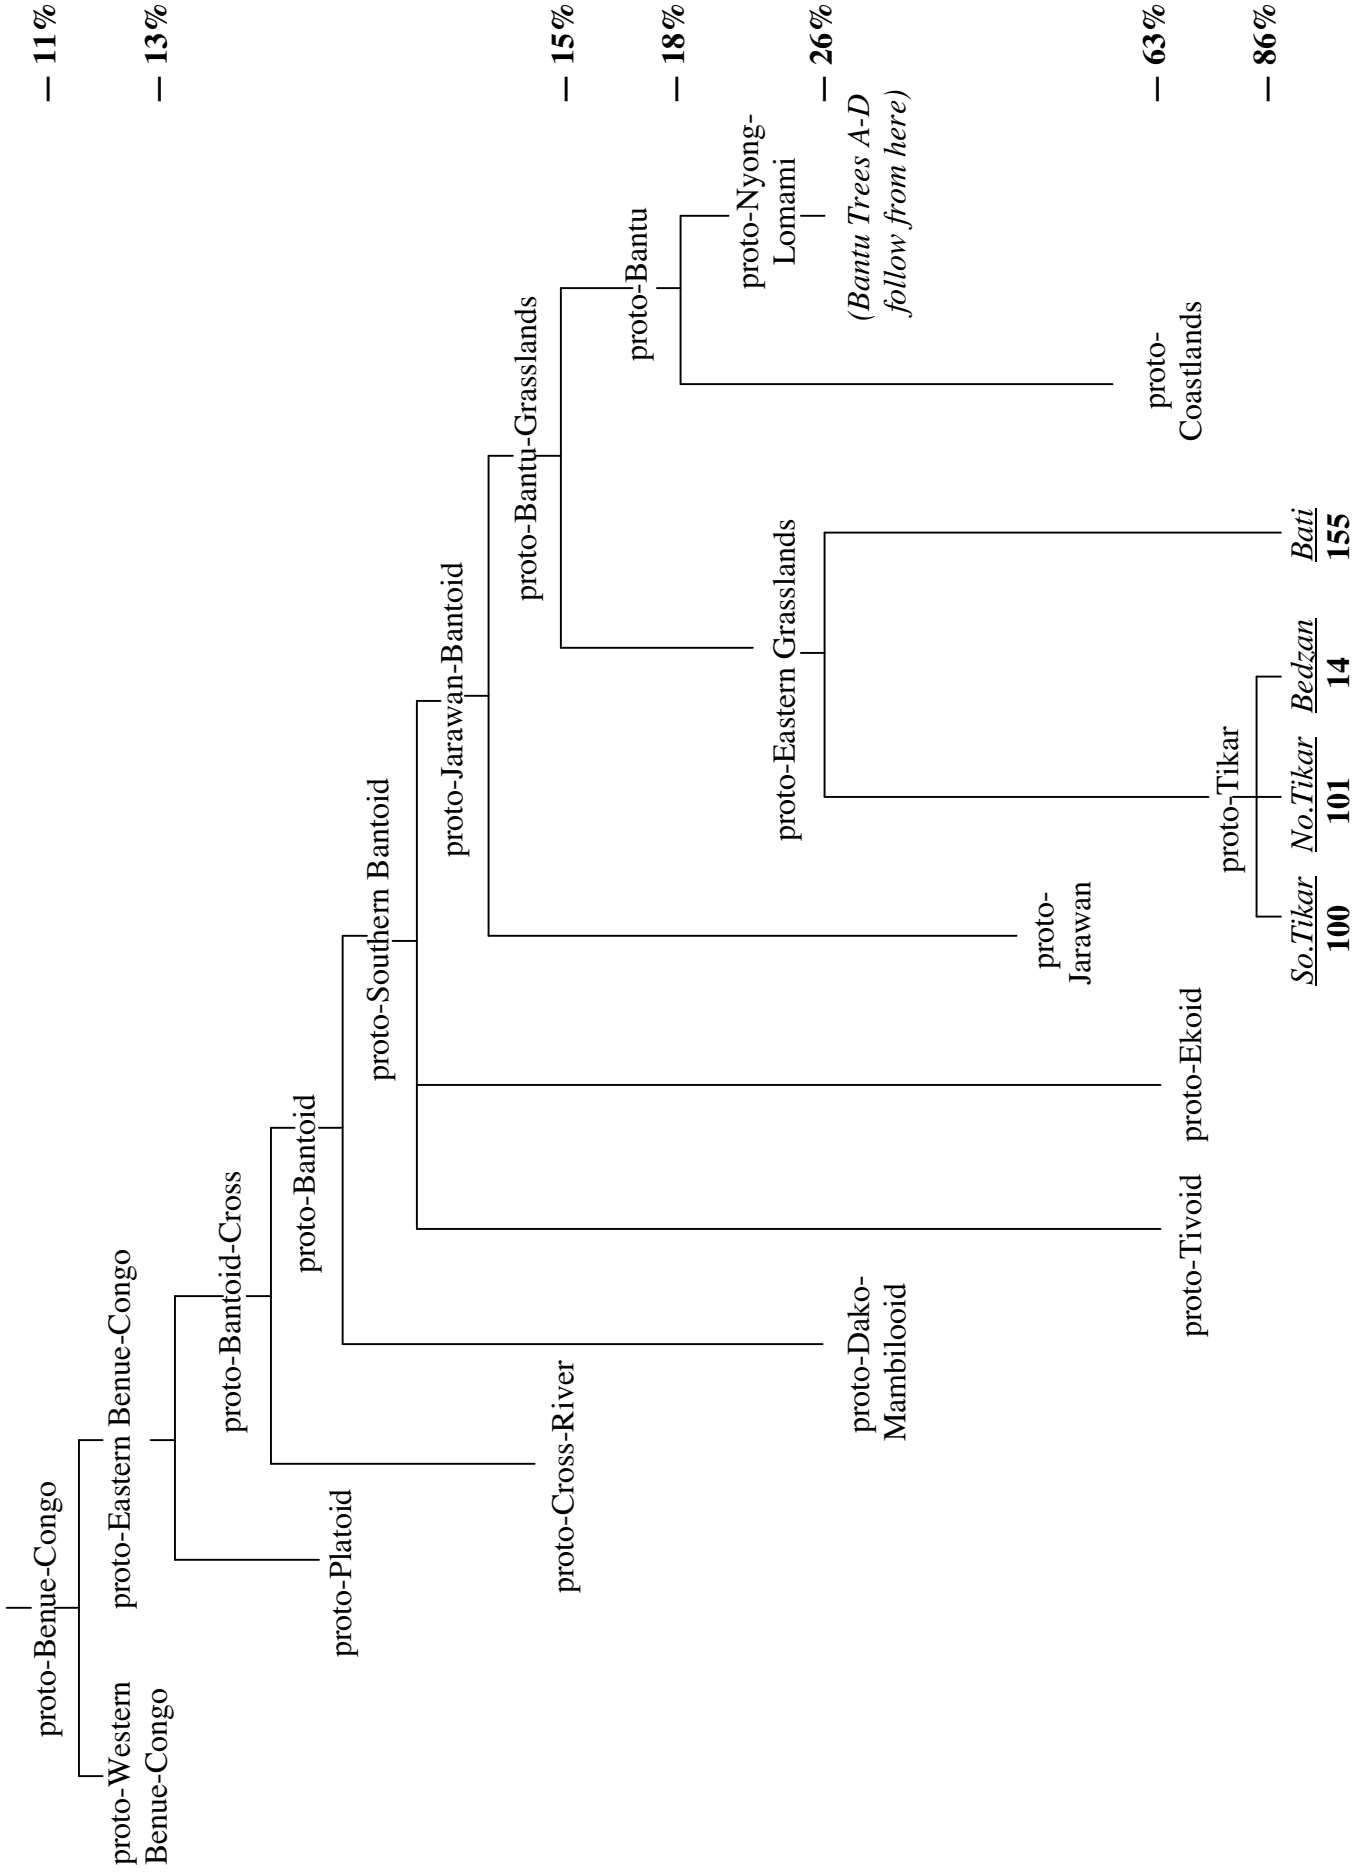

Figure S32c





f)

**C: SECOND-LEVEL BANTU TREE OF RELATIONSHIPS: SAVANNA-BANTU**

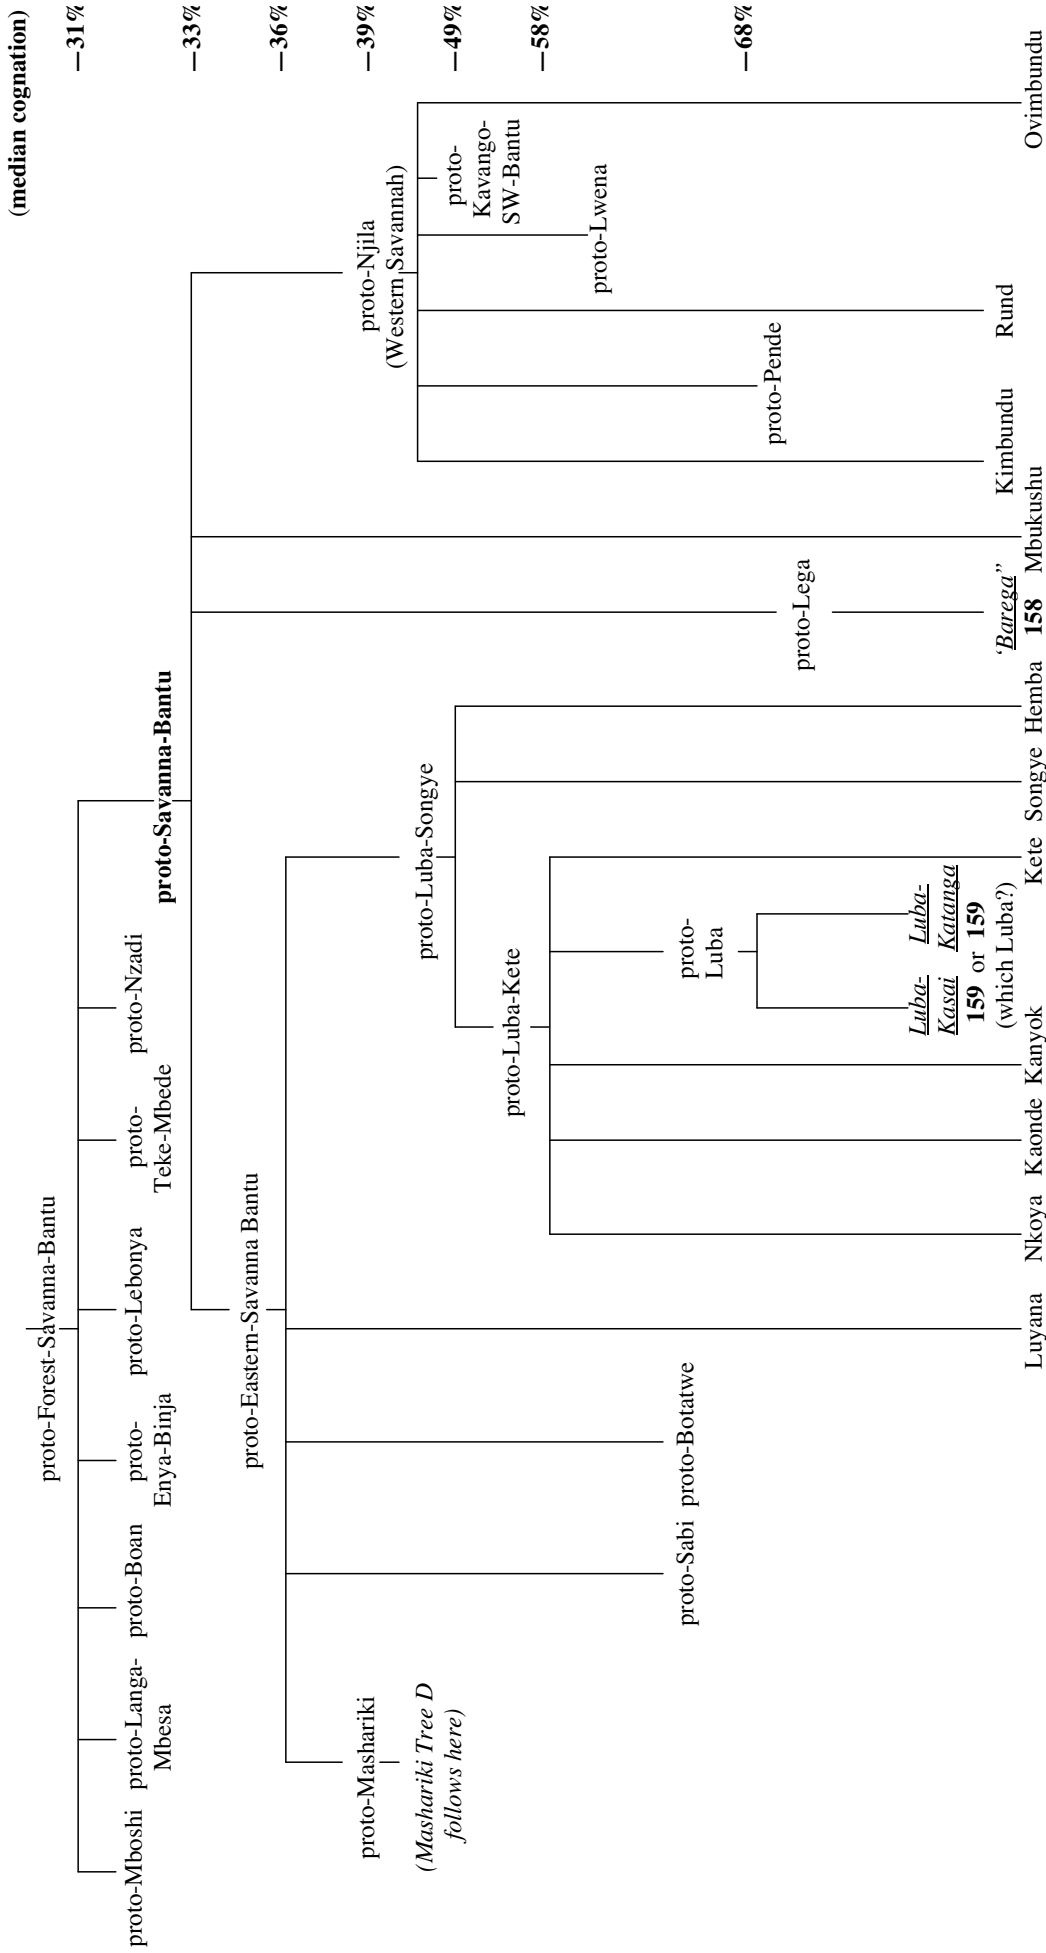

Figure S32f







**NILOTIC STRATIGRAPHERS**

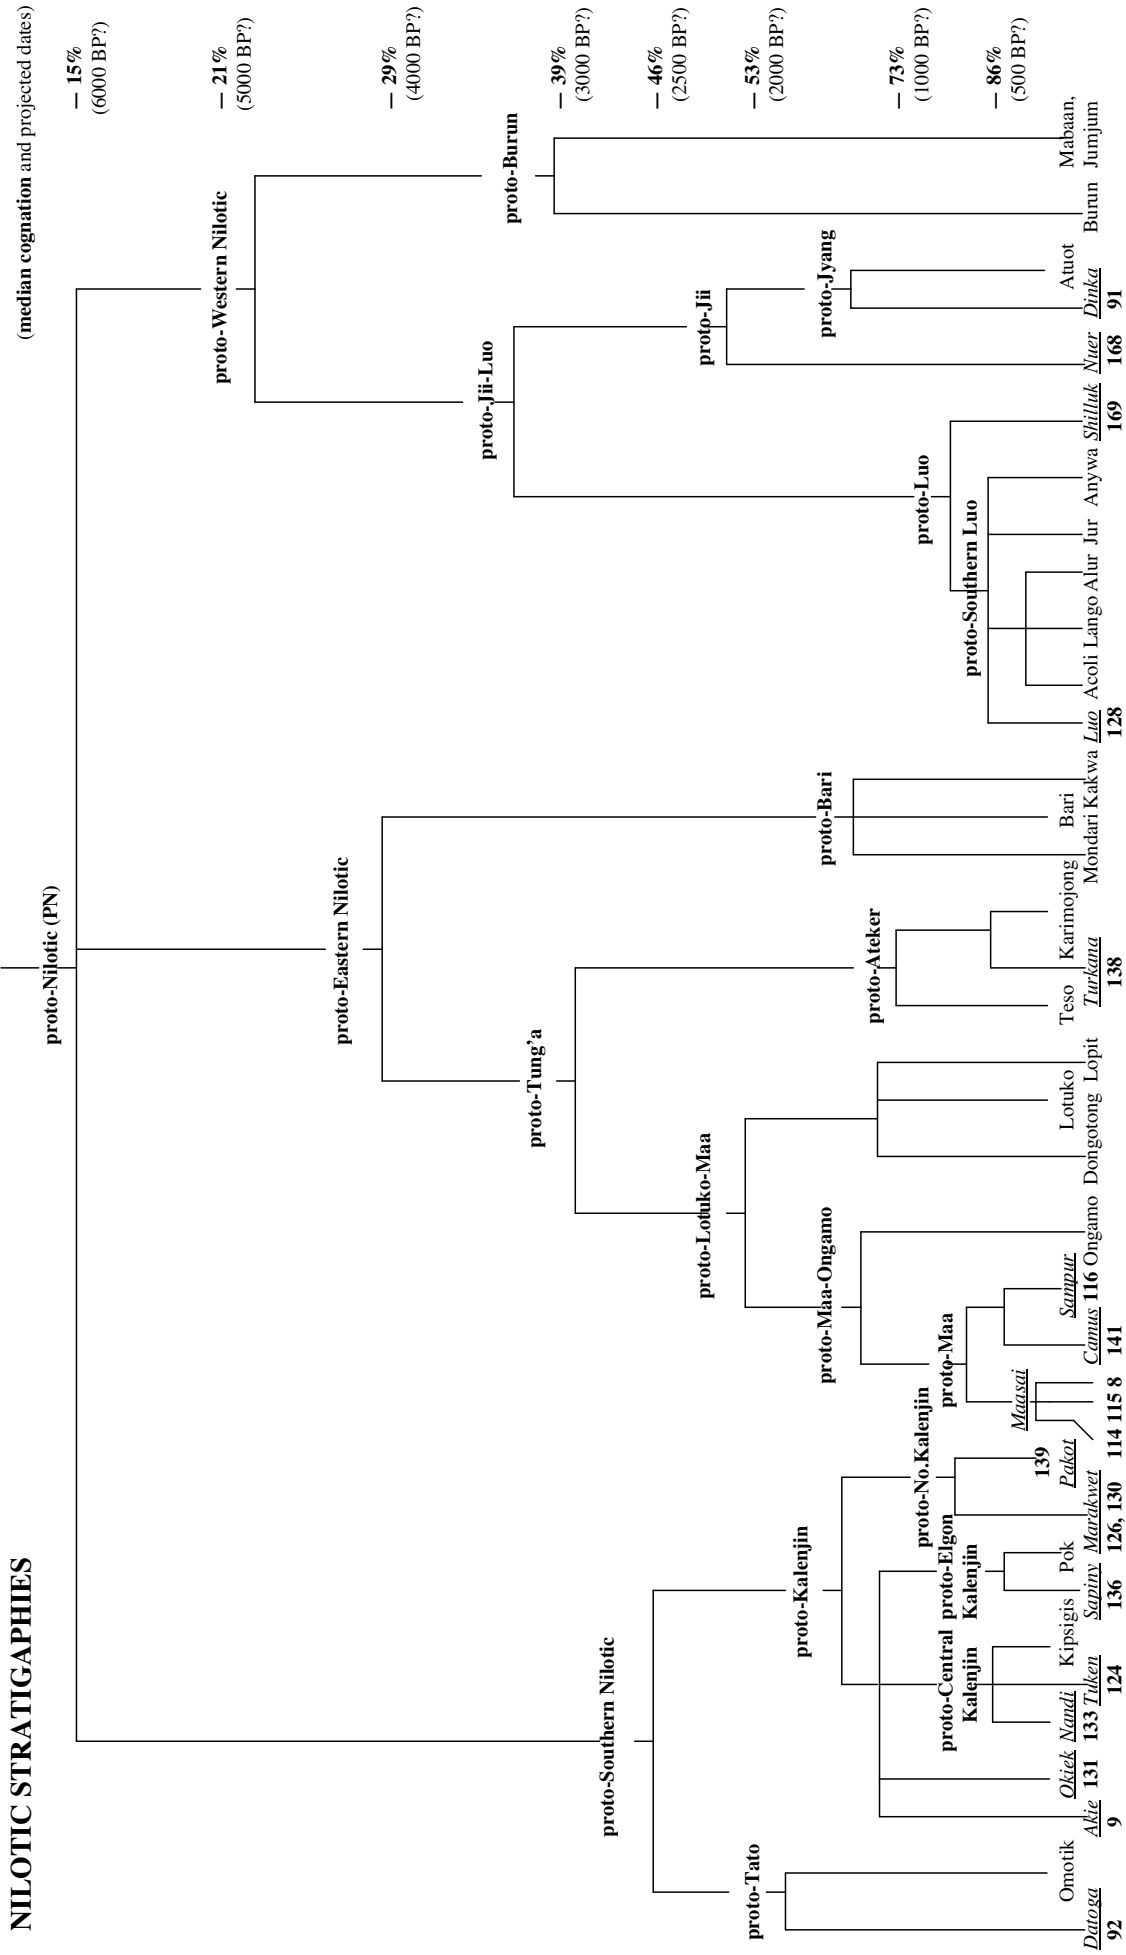

Figure S32i



K)

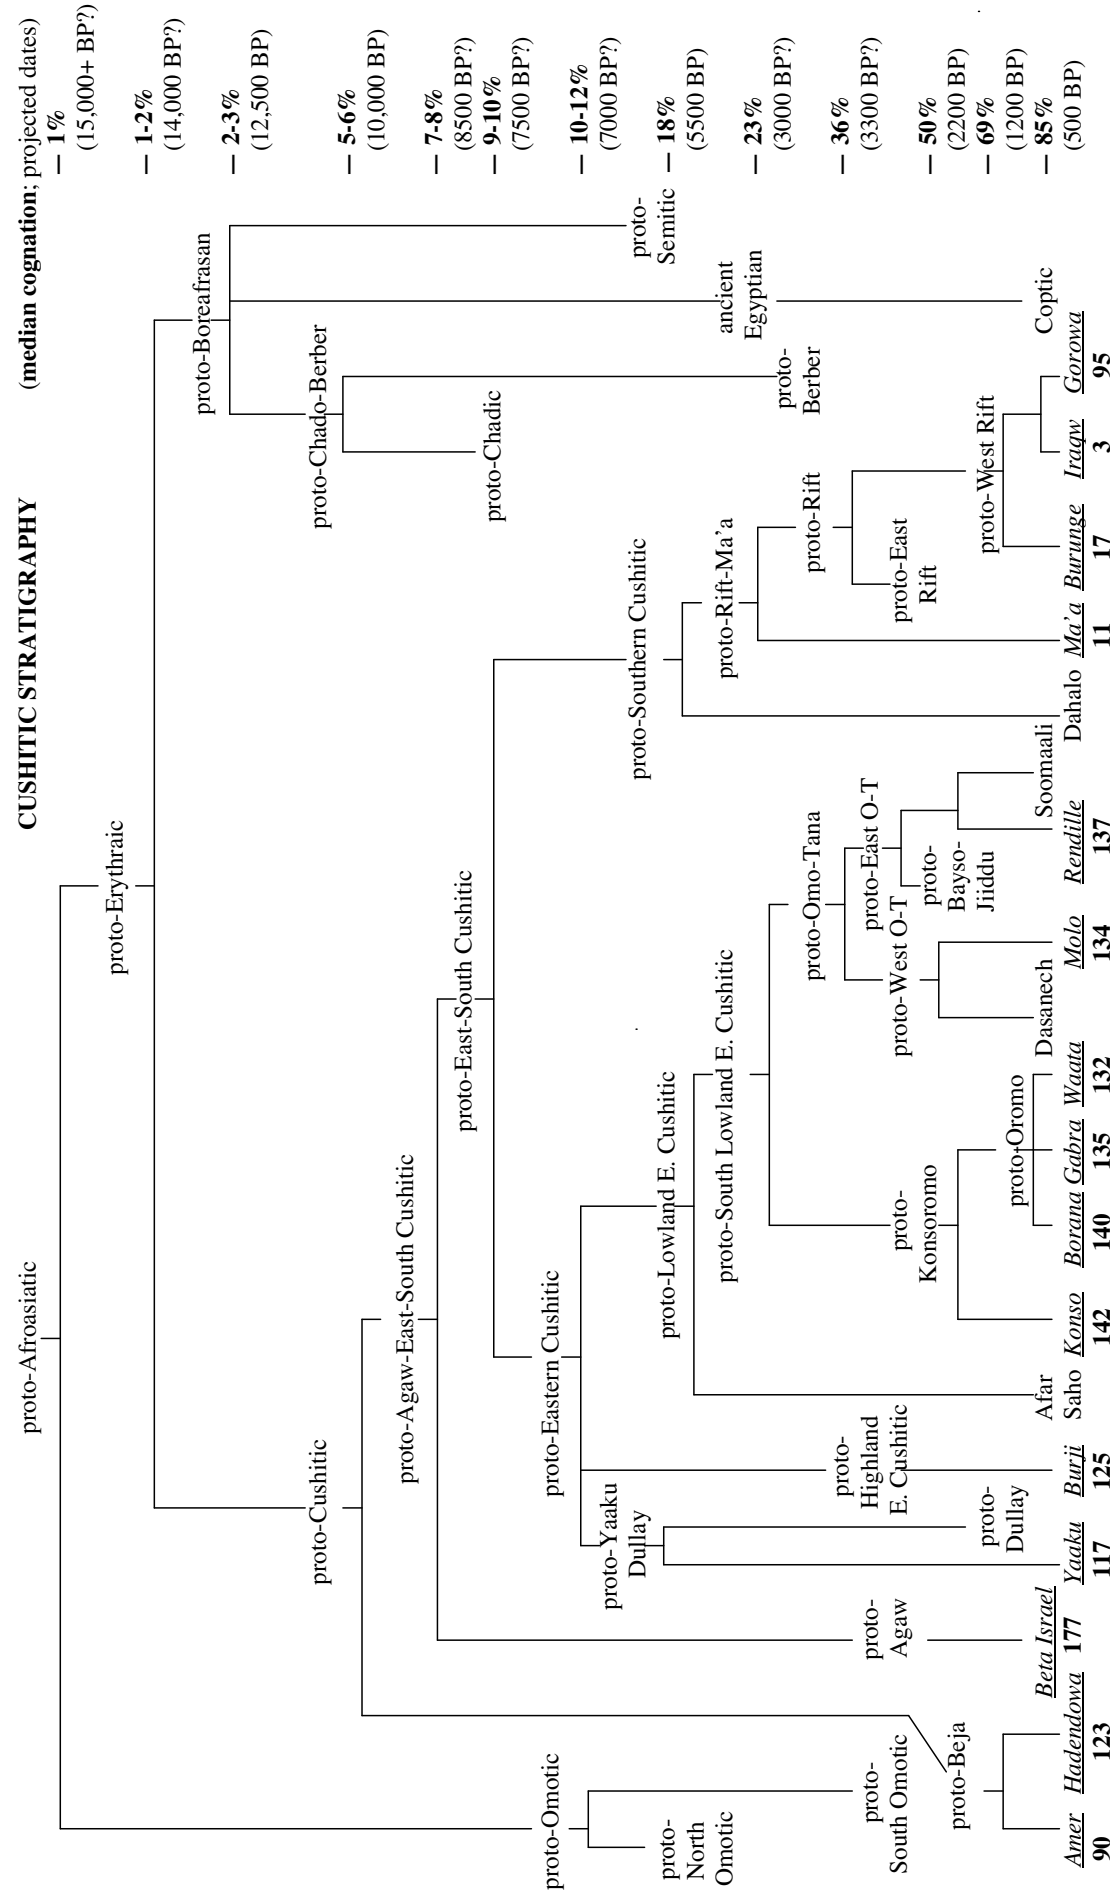

Figure S32k

**Figure S32:** Linguistic relationships among populations and trees of language divergence constructed with several sources of linguistic, archeological, and ethnographic data (S50, S51). Divergence times between related languages were estimated with archeological dates and glottochronological methods (S54). Percent similarity is from the number of shared cognates between languages. Linguistic phylogenies for

- (a) the Khoesan language family
- (b) Niger-Kordofanian language family
- (c) Eastern Bantu-congo languages
- (d) Deep-level Bantu relationships
- (e) Second-level Bantu relationships
- (f) Second-level Bantu relationships for Savanna-bantu
- (g) Third-level bantu relationships for Mashariki Bantu languages
- (h) Nilo-Saharan languages
- (i) Nilotic languages
- (j) Chadic languages
- (k) Cushitic languages

**A**

**Plot of NK with and without Pygmies**

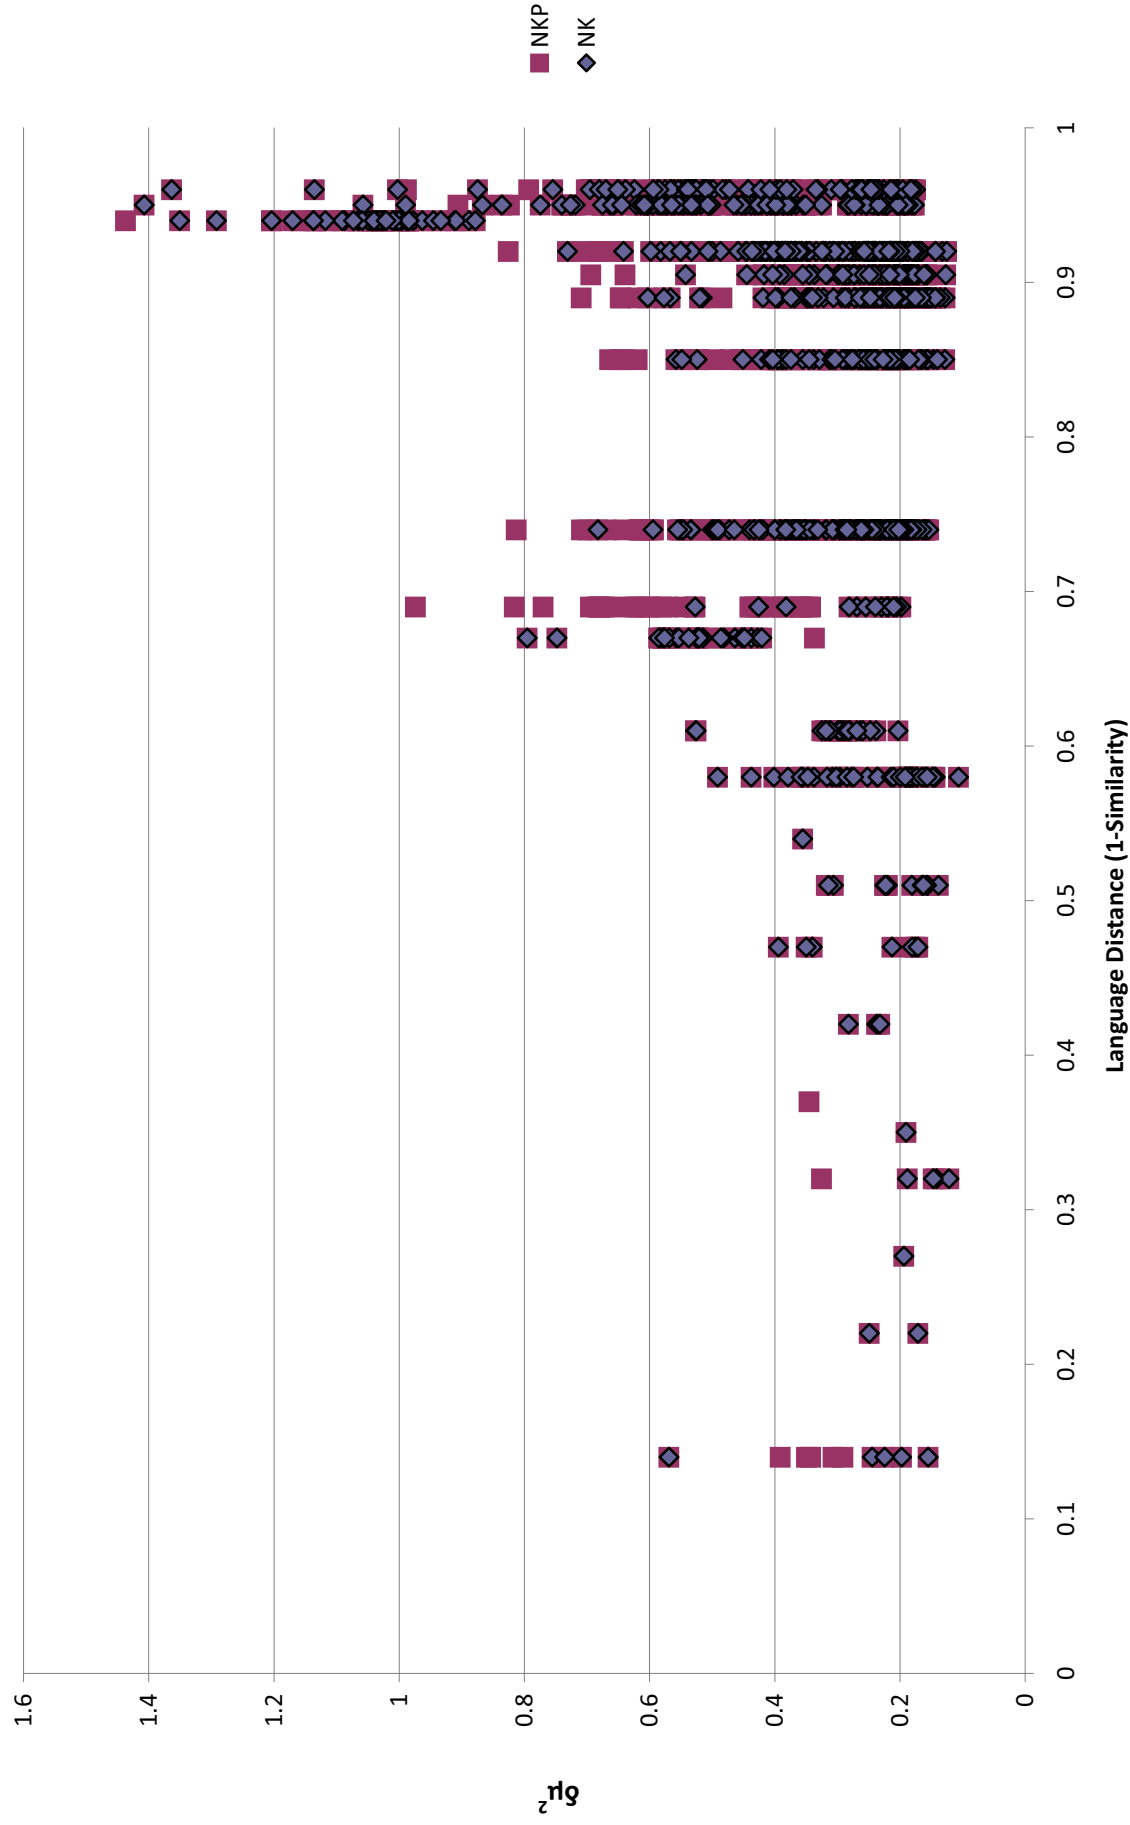

**Figure S33**

**B**

**Plot of NS group**

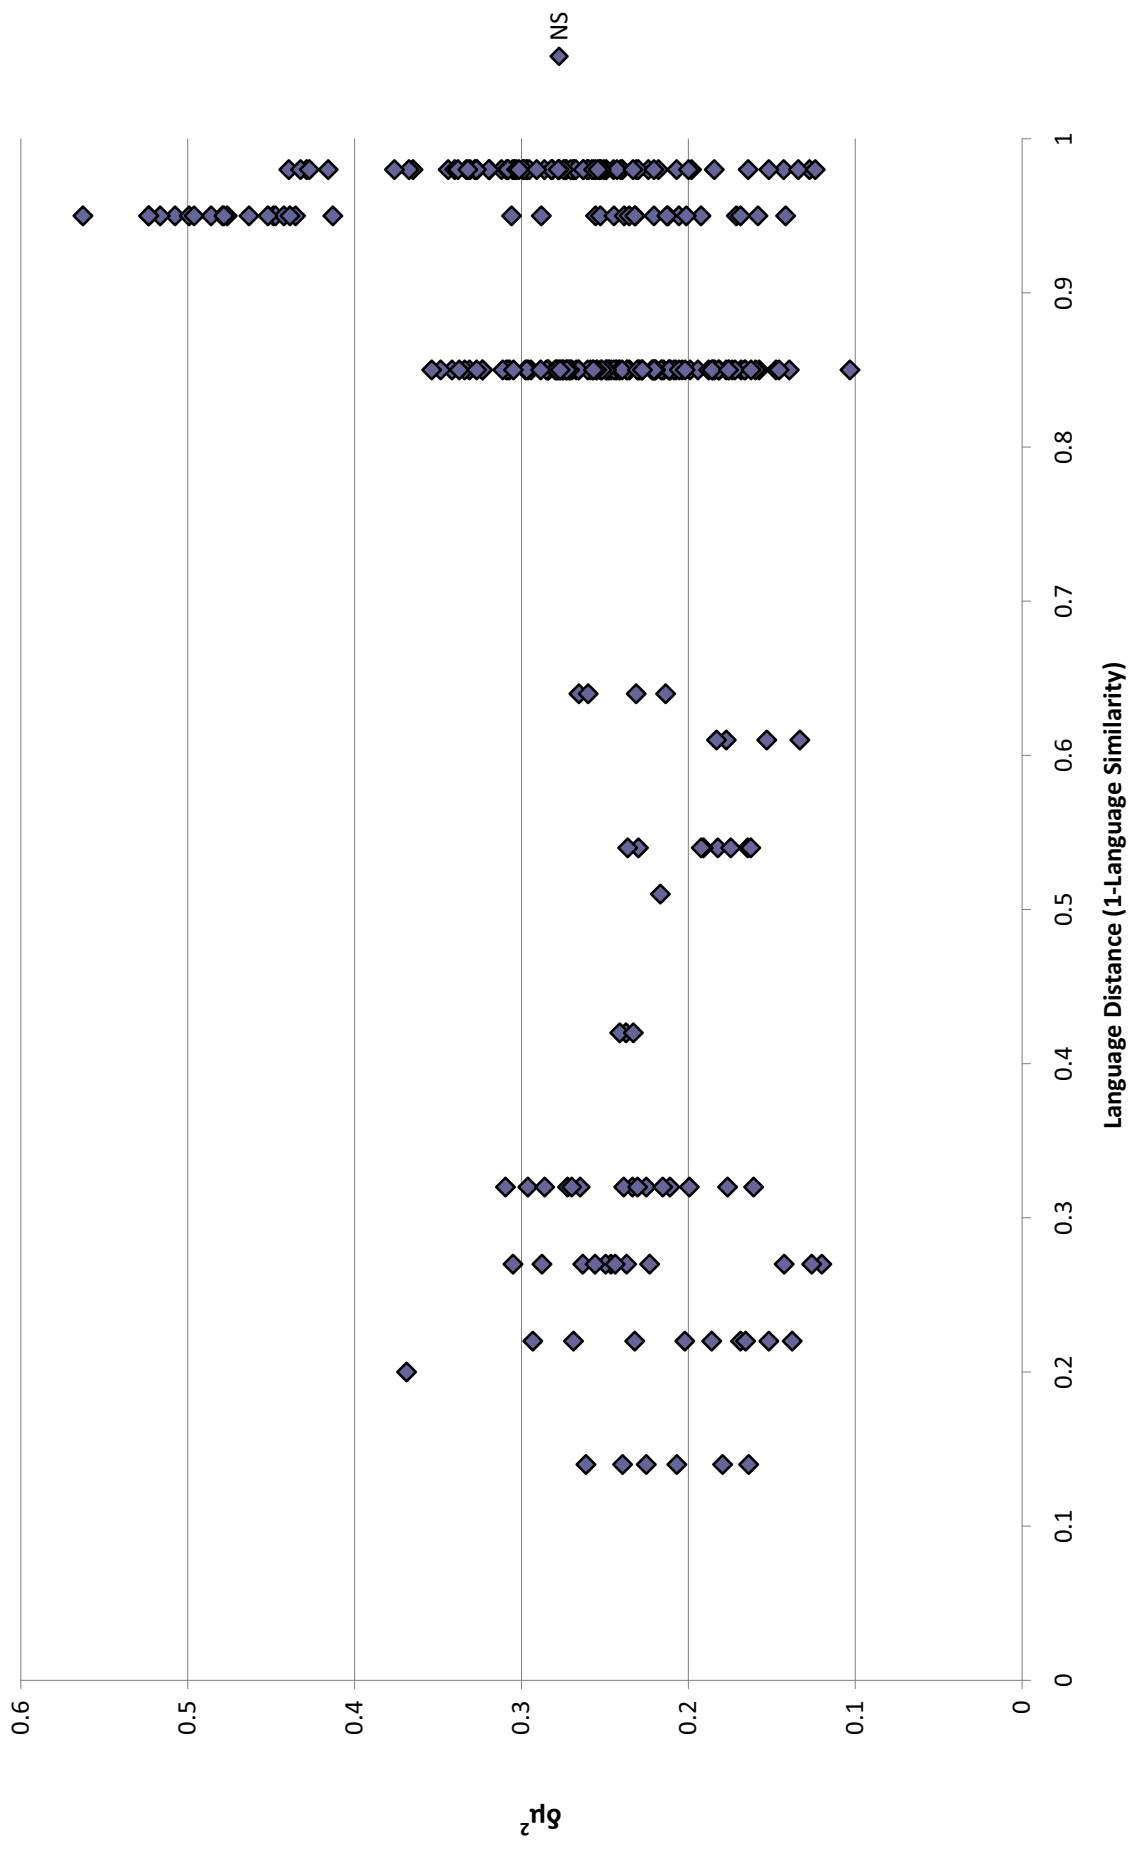

**Figure S33**

C

### Plot of AA group

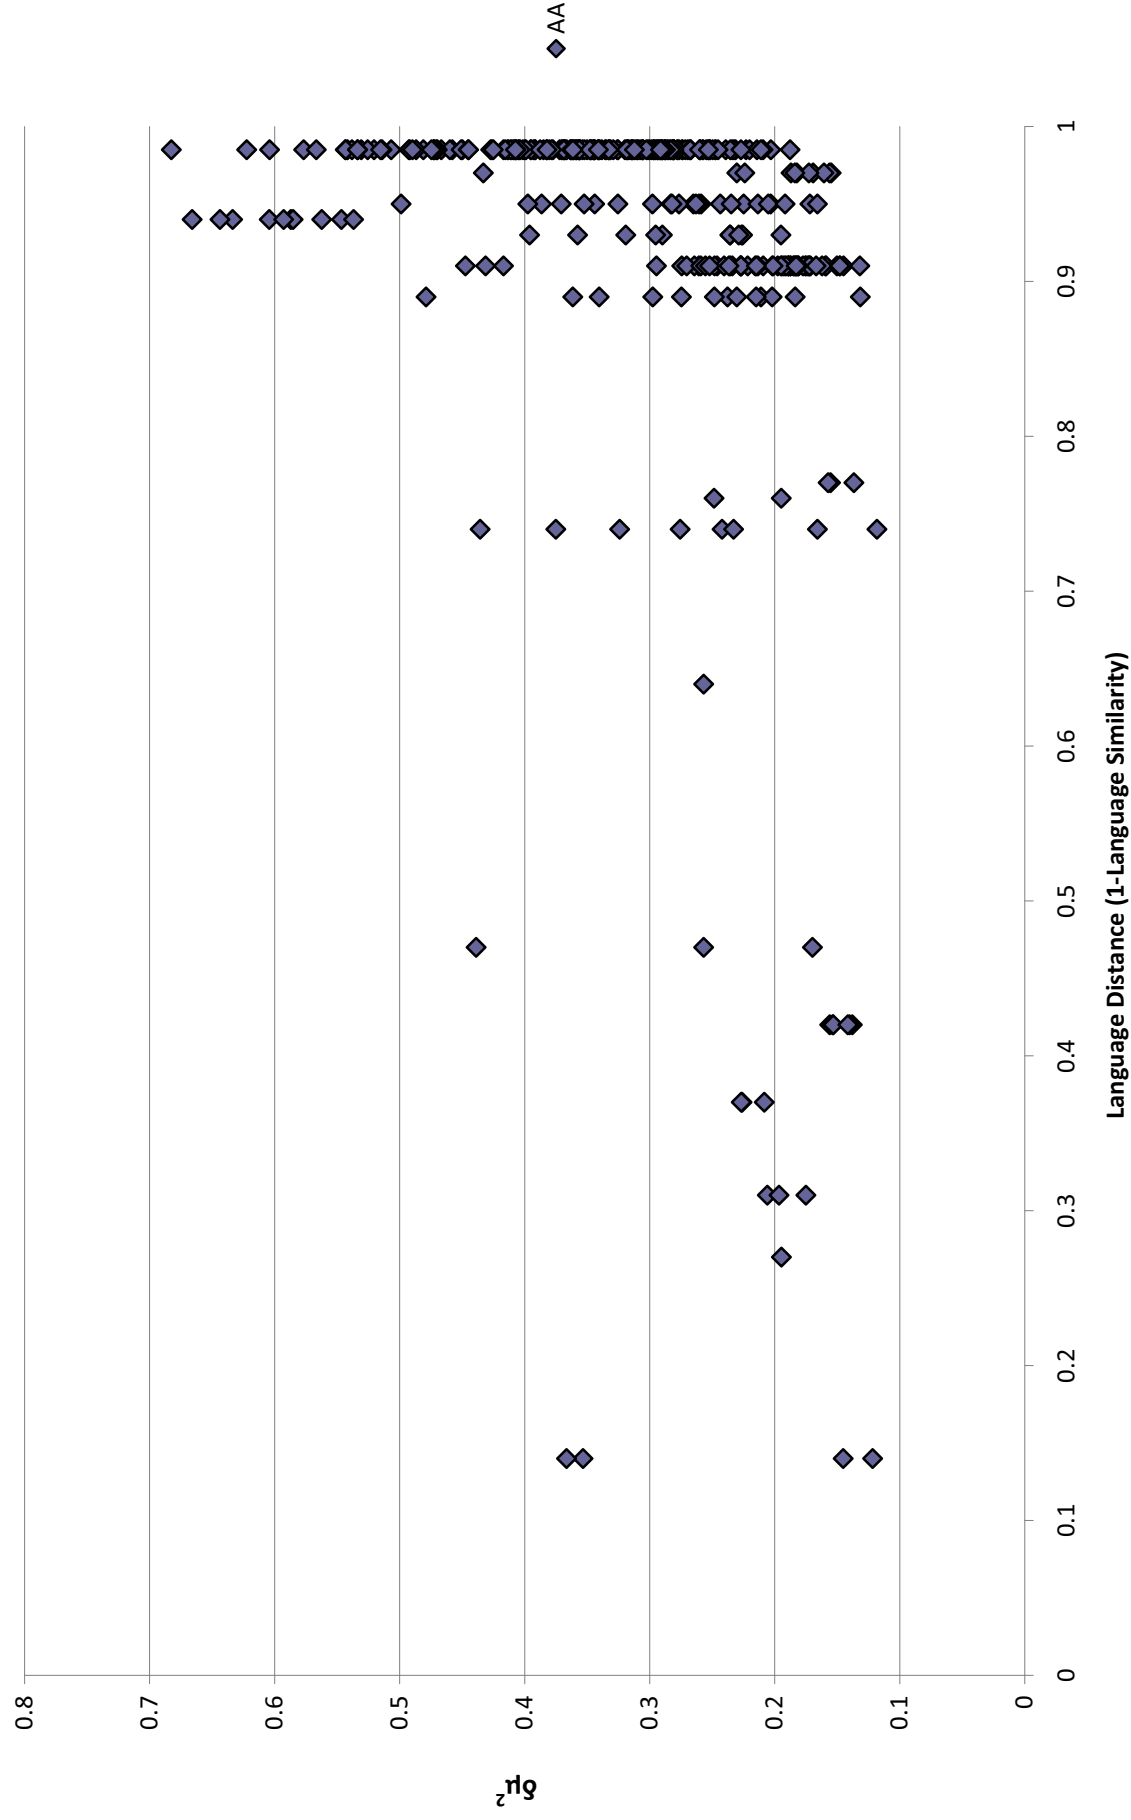

**Figure S33:** Plot of genetic distance  $(\delta\mu)^2$  vs. linguistic distance on the basis of number of shared cognates between pairs of populations within language families. A) NK includes populations speaking a Niger-Kordofanian language, excluding the Pygmies. NKP includes only the pygmies compared to the NK speaking populations and to each other. B) NS includes Nilo-Saharan speaking populations and C) AA includes Afroasiatic speaking populations. The analyses presented in **Table S5** for NK with Pygmies includes the NK and NKP comparisons shown in this figure.

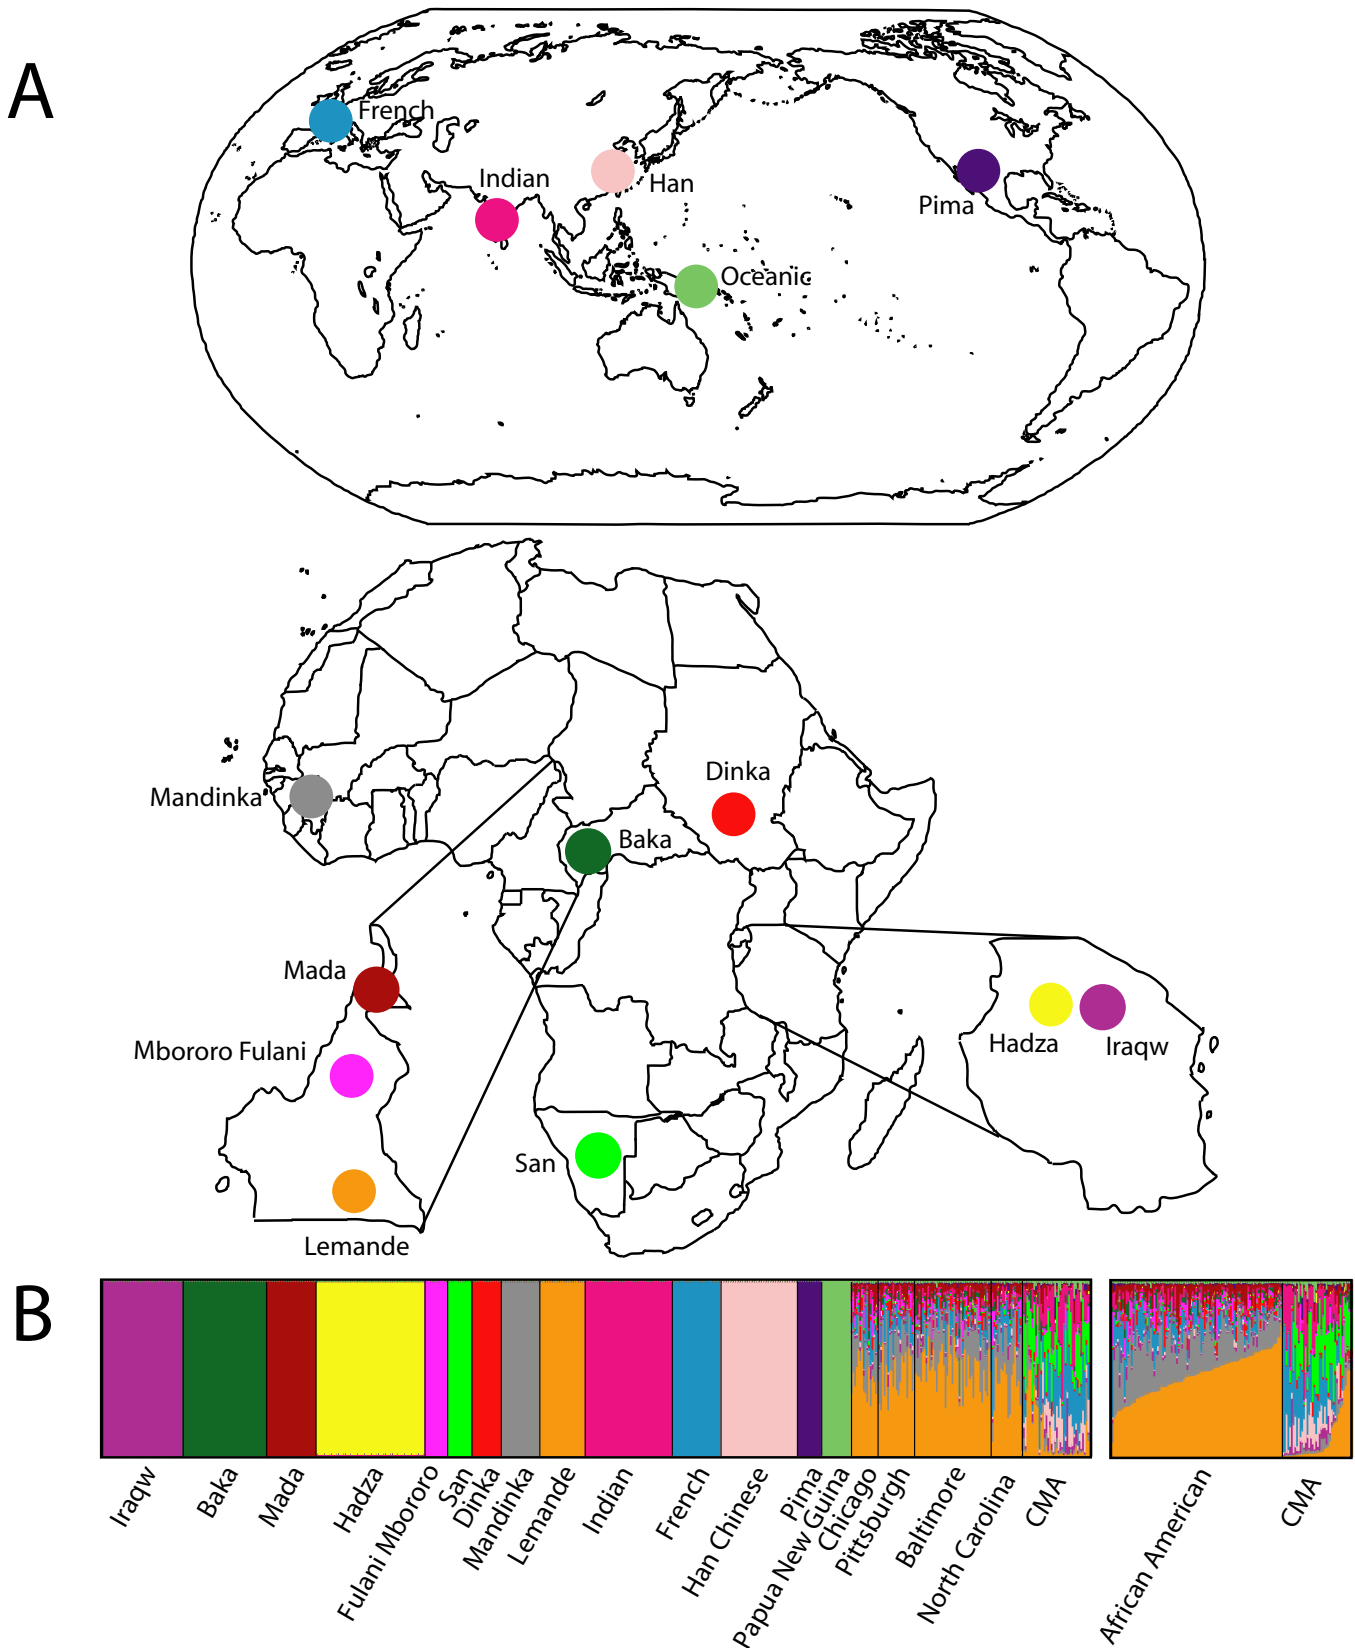

**Figure S34: Analyses of Cape Mixed Ancestry (CMA) and African American populations.** A) The global distribution of training populations used in supervised STRUCTURE analysis to infer CMA and African American ancestry; B) Inferred ancestry in African American and CMA populations using supervised STRUCTURE analysis. Results for individuals from African American sub-populations and the CMA population are shown on the left, and ancestry by proportion of the Mandinka AAC in the pooled African American population and in the CMA population are shown on the right.



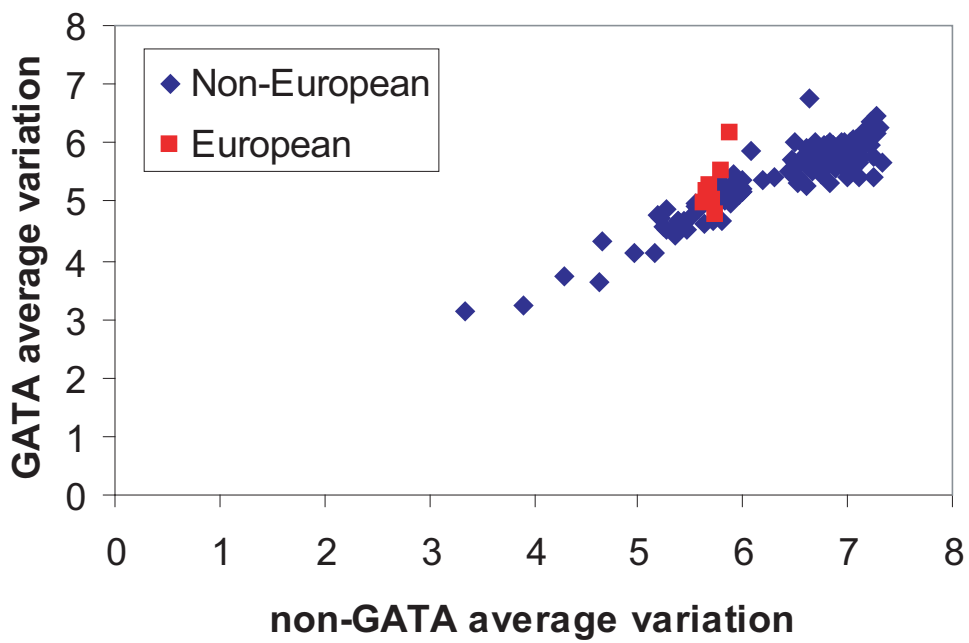

**Figure S35:** Plot of GATA vs non-GATA microsatellite marker variation. These data indicate a significant difference in deviation between European and non-European samples in the ratio of GATA to non-GATA population variances as described in methods.

## **Supplementary Tables**

**Table S1:** Populations used in the current study. Also given are approximate geographic coordinates for location of populations and classification on the basis of language and traditional subsistence method.

**Table S2:** Allele size adjustments made for integrating new African datasets with previously genotyped data from the CEPH diversity panel, India, and Australia.

**Table S3:** Analysis of Molecular Variance (AMOVA) with 848 microsatellites in the global population and among African populations classified by geographic origin, languages spoken, and subsistence.

**Table S4.** Genetic by geographic distance analyses a) Spearman's Rho correlation between genetic and geographic distance by region and within Africa b) heterogeneity of Spearman's Rho across regions

**Table S5:** Regressions of genetic distance on linguistic distance, subdivided by major language families and into sub families, and of genetic distance on geographic distance

**Table S6:** Proportion of AACs for the African American and Cape Mixed Ancestry populations with unsupervised STRUCTURE analysis with the global dataset.

**Table S7:** Proportion of AACs for the African American and Cape Mixed Ancestry populations with a supervised STRUCTURE analysis. Populations with high frequencies of AACs were used as training populations for this analysis. Because none of the African populations show 100% ancestry from a single AAC, these should not be considered as population admixture estimates.

**Table S8:** Proportion of AACs in each populations from global STRUCTURE analyses at K=14. Cells that are the maximum for each column and represent the highest proportion for each AAC are highlighted.

**Table S9:** Proportion of AACs in each populations from Africa STRUCTURE analyses at K=14. Cells that are the maximum for each column and represent the highest proportion for each AAC are highlighted.

Table S1. Populations used in the current study

| Population Name | CEPH n | %Missing | Continent | Region (UN Statistics Division geoscheme with exceptions) | Country     | Latitude | Longitude | Language Family   | Language Major Subgrouping | ISO 639-3 Language Code | Subsistence                 | Notes                                          |
|-----------------|--------|----------|-----------|-----------------------------------------------------------|-------------|----------|-----------|-------------------|----------------------------|-------------------------|-----------------------------|------------------------------------------------|
| Banuamir Beja   | 23     | 13       | Africa    | Saharan Africa                                            | Sudan       | 21.0     | 36.0      | Afroasiatic       | Cushitic                   | BEJ                     | Herder                      |                                                |
| Hadandawa Beja  | 19     | 14       | Africa    | Saharan Africa                                            | Sudan       | 21.0     | 36.0      | Afroasiatic       | Cushitic                   | BEJ                     | Herder                      |                                                |
| Mozabite        | x      | 29       | Africa    | Saharan Africa                                            | Algeria     | 32.0     | 3.0       | Afroasiatic       | Berber                     | MZB                     | Farmer                      | Cann et al. 2002, Rosenberg et al. 2005        |
| Mandinka        | x      | 22       | Africa    | Western Africa                                            | Senegal     | 12.0     | -12.0     | Niger-Kordofanian | Mande                      | MNK                     | Farmer                      | Cann et al. 2002, Rosenberg et al. 2005        |
| Dogon           | 9      | 43       | Africa    | Western Africa                                            | Mali        | 14.0     | -3.0      | Niger-Kordofanian | Dogon                      | DDS                     | Farmer                      |                                                |
| Dioula          | 5      | 19       | Africa    | Western Africa                                            | Ivory Coast | 9.5      | -4.5      | Niger-Kordofanian | Mande                      | DYU                     | Farmer                      |                                                |
| Ashanti         | 15     | 14       | Africa    | Western Africa                                            | Ghana       | 6.0      | -1.0      | Niger-Kordofanian | Kwa                        | AKA                     | Farmer                      |                                                |
| Brong           | 26     | 13       | Africa    | Western Africa                                            | Ghana       | 7.5      | -2.0      | Niger-Kordofanian | Kwa                        | ABR                     | Farmer                      |                                                |
| Hausa           | 16     | 13       | Africa    | Western Africa                                            | Nigeria     | 12.0     | 8.0       | Afroasiatic       | Chadic                     | HAU                     | Farmer                      |                                                |
| Fulani          | 4      | 13       | Africa    | Western Africa                                            | Nigeria     | 11.0     | 11.0      | Niger-Kordofanian | Senegambian                | FUV                     | Herder                      |                                                |
| Yoruba (CEPH)   | x      | 22       | Africa    | Western Africa                                            | Nigeria     | 8.0      | 4.0       | Niger-Kordofanian | Defoid                     | YOR                     | Farmer                      | new sample, not CEPH                           |
| Igala           | 17     | 13       | Africa    | Western Africa                                            | Nigeria     | 7.0      | 5.0       | Niger-Kordofanian | Defoid                     | IGL                     | Farmer                      | Cann et al. 2002, Rosenberg et al. 2005, The Y |
| Igbo            | 28     | 13       | Africa    | Western Africa                                            | Nigeria     | 6.0      | 7.0       | Niger-Kordofanian | Igboid                     | IBO                     | Farmer                      |                                                |
| Gwari           | 22     | 15       | Africa    | Western Africa                                            | Nigeria     | 10.0     | 7.0       | Niger-Kordofanian | Nupoid                     | GBR                     | Farmer                      |                                                |
| Bassange        | 20     | 13       | Africa    | Western Africa                                            | Nigeria     | 9.0      | 5.5       | Niger-Kordofanian | Nupoid                     | NUP                     | Farmer                      |                                                |
| Koma            | 12     | 28       | Africa    | Western Africa                                            | Nigeria     | 8.5      | 12.7      | Niger-Kordofanian | Adamawa-Ubangi             | KMY                     | Mixed Farmer                |                                                |
| Mada            | 28     | 19       | Africa    | Central Africa                                            | Cameroon    | 10.8     | 14.1      | Afroasiatic       | Chadic                     | MXU                     | Farmer                      |                                                |
| Ouldeme         | 26     | 17       | Africa    | Central Africa                                            | Cameroon    | 11.0     | 14.3      | Afroasiatic       | Chadic                     | UDL                     | Farmer                      |                                                |
| Giziga          | 24     | 17       | Africa    | Central Africa                                            | Cameroon    | 10.3     | 14.3      | Afroasiatic       | Chadic                     | GIZ                     | Farmer                      |                                                |
| Mandara         | 26     | 18       | Africa    | Central Africa                                            | Cameroon    | 11.3     | 14.0      | Afroasiatic       | Chadic                     | MFI                     | Farmer                      |                                                |
| Kotoko          | 17     | 16       | Africa    | Central Africa                                            | Cameroon    | 11.8     | 14.8      | Afroasiatic       | Chadic                     | KOT                     | Farmer                      |                                                |
| Zulgo           | 22     | 18       | Africa    | Central Africa                                            | Cameroon    | 10.8     | 14.0      | Afroasiatic       | Chadic                     | GND                     | Farmer                      |                                                |
| Podokwo         | 30     | 19       | Africa    | Central Africa                                            | Cameroon    | 11.0     | 12.1      | Afroasiatic       | Chadic                     | PDI                     | Farmer                      |                                                |
| Massa           | 15     | 15       | Africa    | Central Africa                                            | Cameroon    | 10.3     | 15.3      | Afroasiatic       | Chadic                     | MCN                     | Mixed Farmer (with fishing) |                                                |
| Hausa           | 27     | 19       | Africa    | Central Africa                                            | Cameroon    | 10.5     | 14.5      | Afroasiatic       | Chadic                     | HAU                     | Farmer                      |                                                |
| Baggara         | 23     | 18       | Africa    | Central Africa                                            | Cameroon    | 12.5     | 14.5      | Afroasiatic       | Semitic                    | SHU                     | Herder                      |                                                |
| Adamawa Fulani  | 41     | 18       | Africa    | Central Africa                                            | Cameroon    | 9.0      | 13.5      | Niger-Kordofanian | Senegambian                | FUB                     | Herder                      |                                                |
| Mbororo Fulani  | 13     | 18       | Africa    | Central Africa                                            | Cameroon    | 11.8     | 14.8      | Niger-Kordofanian | Senegambian                | FUV                     | Herder                      |                                                |
| Tupuri          | 22     | 18       | Africa    | Central Africa                                            | Cameroon    | 10.3     | 14.8      | Niger-Kordofanian | Adamawa-Ubangi             | TUI                     | Farmer                      |                                                |
| Baka            | 42     | 19       | Africa    | Central Africa                                            | Cameroon    | 2.5      | 13.5      | Niger-Kordofanian | Adamawa-Ubangi             | BKC                     | Hunter-Gatherer             |                                                |
| Bakola          | 48     | 17       | Africa    | Central Africa                                            | Cameroon    | 2.8      | 10.0      | Niger-Kordofanian | Bantoid                    | GYI                     | Hunter-Gatherer             |                                                |
| Bedzan          | 17     | 17       | Africa    | Central Africa                                            | Cameroon    | 5.5      | 11.6      | Niger-Kordofanian | Bantoid                    | TIK                     | Hunter-Gatherer             |                                                |
| Mvae            | 24     | 18       | Africa    | Central Africa                                            | Cameroon    | 3.0      | 12.0      | Niger-Kordofanian | Bantoid                    | FAN                     | Farmer                      |                                                |
| Ngumba          | 27     | 21       | Africa    | Central Africa                                            | Cameroon    | 3.0      | 10.3      | Niger-Kordofanian | Bantoid                    | NMG                     | Farmer                      |                                                |
| Zime            | 30     | 19       | Africa    | Central Africa                                            | Cameroon    | 9.0      | 14.5      | Afroasiatic       | Chadic                     | ZIM                     | Farmer                      |                                                |
| Bamoun          | 31     | 19       | Africa    | Central Africa                                            | Cameroon    | 5.5      | 10.8      | Niger-Kordofanian | Bantoid                    | BAX                     | Farmer                      |                                                |
| Banen           | 25     | 18       | Africa    | Central Africa                                            | Cameroon    | 4.8      | 10.8      | Niger-Kordofanian | Bantoid                    | BAZ                     | Farmer                      |                                                |
| Bafia           | 30     | 19       | Africa    | Central Africa                                            | Cameroon    | 4.8      | 11.0      | Niger-Kordofanian | Bantoid                    | KSF                     | Farmer                      |                                                |
| Lemande         | 26     | 19       | Africa    | Central Africa                                            | Cameroon    | 4.5      | 11.0      | Niger-Kordofanian | Bantoid                    | LEM                     | Farmer                      |                                                |
| Balanga         | 20     | 18       | Africa    | Central Africa                                            | Cameroon    | 3.0      | 10.0      | Niger-Kordofanian | Bantoid                    | BNM                     | Farmer                      |                                                |
| Iyassa          | 37     | 13       | Africa    | Central Africa                                            | Cameroon    | 2.5      | 9.8       | Niger-Kordofanian | Bantoid                    | YKO                     | Farmer (with fishing)       |                                                |
| Fang            | 19     | 14       | Africa    | Central Africa                                            | Cameroon    | 2.5      | 13.0      | Niger-Kordofanian | Bantoid                    | FAN                     | Farmer                      |                                                |
| Mabea           | 13     | 13       | Africa    | Central Africa                                            | Cameroon    | 2.9      | 10.3      | Niger-Kordofanian | Bantoid                    | NMG                     | Farmer (with fishing)       |                                                |
| Yambassa        | 17     | 15       | Africa    | Central Africa                                            | Cameroon    | 4.8      | 11.3      | Niger-Kordofanian | Bantoid                    | YAS                     | Farmer                      |                                                |
| South Tikar     | 21     | 13       | Africa    | Central Africa                                            | Cameroon    | 5.5      | 11.5      | Niger-Kordofanian | Bantoid                    | TIK                     | Farmer                      |                                                |
| North Tikar     | 13     | 13       | Africa    | Central Africa                                            | Cameroon    | 6.3      | 11.5      | Niger-Kordofanian | Bantoid                    | TIK                     | Farmer                      |                                                |
| Ntumu           | 11     | 12       | Africa    | Central Africa                                            | Cameroon    | 2.3      | 10.5      | Niger-Kordofanian | Bantoid                    | FAN                     | Farmer                      |                                                |
| Bulu            | 22     | 13       | Africa    | Central Africa                                            | Cameroon    | 3.0      | 11.0      | Niger-Kordofanian | Bantoid                    | BUM                     | Farmer                      |                                                |
| Eton            | 4      | 17       | Africa    | Central Africa                                            | Cameroon    | 4.3      | 11.5      | Niger-Kordofanian | Bantoid                    | ETO                     | Farmer                      |                                                |
| Wimbum          | 15     | 21       | Africa    | Central Africa                                            | Cameroon    | 6.5      | 10.8      | Niger-Kordofanian | Bantoid                    | LMP                     | Farmer                      |                                                |
| Batie           | 16     | 20       | Africa    | Central Africa                                            | Cameroon    | 4.3      | 11.0      | Niger-Kordofanian | Bantoid                    | BBJ                     | Farmer                      |                                                |
| Ewondo          | 3      | 16       | Africa    | Central Africa                                            | Cameroon    | 3.8      | 11.5      | Niger-Kordofanian | Bantoid                    | EWO                     | Farmer                      |                                                |
| Kanuri          | x      | 31       | Africa    | Central Africa                                            | Cameroon    | 11.3     | 14.3      | Nilo-Saharan      | Saharan                    | KNC                     | Hunter-Gatherer             | Cann et al. 2002, Rosenberg et al. 2005        |
| Biaka           | 23     | 27       | Africa    | Central Africa                                            | C.A.R       | 4.0      | 17.0      | Niger-Kordofanian | Adamawa-Ubangi             | GDI                     | Farmer                      |                                                |
| Mbum            | 13     | 20       | Africa    | Central Africa                                            | C.A.R       | 5.5      | 13.5      | Niger-Kordofanian | Adamawa-Ubangi             | MDD                     | Farmer                      |                                                |
| Yakoma          | 6      | 20       | Africa    | Central Africa                                            | C.A.R       | 4.3      | 22.3      | Niger-Kordofanian | Adamawa-Ubangi             | YKY                     | Farmer                      |                                                |
| Gbaya           | 15     | 20       | Africa    | Central Africa                                            | C.A.R       | 5.0      | 15.0      | Niger-Kordofanian | Adamawa-Ubangi             | GYA                     | Farmer                      |                                                |
| Laka            | 33     | 18       | Africa    | Central Africa                                            | Chad        | 8.0      | 16.0      | Nilo-Saharan      | Central Sudanic            | LAP                     | Farmer                      |                                                |
| Ngambaye        | 30     | 19       | Africa    | Central Africa                                            | Chad        | 9.0      | 16.0      | Nilo-Saharan      | Central Sudanic            | SBA                     | Farmer                      |                                                |
| Kaba            | 27     | 19       | Africa    | Central Africa                                            | Chad        | 8.0      | 16.8      | Nilo-Saharan      | Central Sudanic            | KSP                     | Farmer                      |                                                |
| Bulala          | 15     | 18       | Africa    | Central Africa                                            | Chad        | 13.0     | 18.0      | Nilo-Saharan      | Central Sudanic            | MNE                     | Farmer (with fishing)       |                                                |
| Kanembou        | 5      | 18       | Africa    | Central Africa                                            | Chad        | 14.0     | 15.0      | Nilo-Saharan      | Saharan                    | KBL                     | Mixed Farmer                |                                                |

Table S1. Populations used in the current study

| Population Name     | CEPH n | %Missing | Continent | Region (UN Statistics Division geoscheme with exceptions) | Country      | Latitude | Longitude | Language Family     | Language Major Subgrouping | ISO 639-3 Language Code | Subsistence     | Notes                                        |
|---------------------|--------|----------|-----------|-----------------------------------------------------------|--------------|----------|-----------|---------------------|----------------------------|-------------------------|-----------------|----------------------------------------------|
| Sara                | 27     | 20       | Africa    | Central Africa                                            | Chad         | 8.0      | 17.5      | Nilo-Saharan        | Central Sudanic            | LUA                     | Farmer          | combination of Sara Madjingaye, Sara Gor, Sa |
| Baluba              | 6      | 23       | Africa    | Central Africa                                            | D.R.C.       | -9.0     | 25.0      | Niger-Kordofanian   | Bantoid                    | KNG                     | Farmer          |                                              |
| Kongo               | 17     | 19       | Africa    | Central Africa                                            | D.R.C.       | -5.5     | 15.0      | Niger-Kordofanian   | Bantoid                    | LEA                     | Farmer          |                                              |
| Barega              | 4      | 18       | Africa    | Central Africa                                            | D.R.C.       | -3.5     | 28.0      | Niger-Kordofanian   | Bantoid                    | LES                     | Farmer          |                                              |
| Mbuti               | x      | 13       | Africa    | Central Africa                                            | D.R.C.       | 1.0      | 29.0      | Nilo-Saharan        | Central Sudanic            | KIN                     | Hunter-Gatherer | Cann et al. 2002, Rosenberg et al. 2005      |
| Tutsi/Hutu          | 8      | 18       | Africa    | Central Africa                                            | Rwanda       | -2.0     | 30.0      | Niger-Kordofanian   | Bantoid                    | DIP                     | Mixed Farmer    | Mixed Sample                                 |
| Dinka               | 17     | 14       | Africa    | Central Africa (deviation from UN)                        | South Sudan  | 8.0      | 30.0      | Nilo-Saharan        | Eastern Sudanic            | NUS                     | Herder          |                                              |
| Nuer                | 18     | 46       | Africa    | Central Africa (deviation from UN)                        | South Sudan  | 8.5      | 31.0      | Nilo-Saharan        | Eastern Sudanic            | SHK                     | Herder          |                                              |
| Shilluk             | 15     | 45       | Africa    | Central Africa (deviation from UN)                        | South Sudan  | 10.0     | 32.0      | Nilo-Saharan        | Eastern Sudanic            | NYI                     | Herder          |                                              |
| Nyiming             | 12     | 42       | Africa    | Central Africa (deviation from UN)                        | South Sudan  | 12.3     | 29.5      | Nilo-Saharan        | Eastern Sudanic            | HTS                     | Herder          |                                              |
| Hadza               | 63     | 18       | Africa    | Eastern Africa                                            | Tanzania     | -3.8     | 35.3      | Khoesan             | Hadza                      | SAD                     | Hunter-Gatherer |                                              |
| Sandawe             | 51     | 18       | Africa    | Eastern Africa                                            | Tanzania     | -5.5     | 35.5      | Khoesan             | Sandawe                    | IRK                     | Hunter-Gatherer |                                              |
| Iraqw               | 46     | 18       | Africa    | Eastern Africa                                            | Tanzania     | -4.0     | 35.5      | Afroasiatic         | Cushitic                   | BDS                     | Mixed Farmer    |                                              |
| Burunge             | 22     | 19       | Africa    | Eastern Africa                                            | Tanzania     | -5.3     | 36.0      | Afroasiatic         | Cushitic                   | GOW                     | Mixed Farmer    |                                              |
| Fionne              | 22     | 15       | Africa    | Eastern Africa                                            | Tanzania     | -4.3     | 35.8      | Afroasiatic         | Cushitic                   | MHD                     | Mixed Farmer    |                                              |
| Mbugu               | 22     | 18       | Africa    | Eastern Africa                                            | Tanzania     | -4.8     | 38.5      | mixed A.A. and N.K. |                            | MAS                     | Mixed Farmer    |                                              |
| Maasai              | 36     | 18       | Africa    | Eastern Africa                                            | Tanzania     | -4.0     | 37.0      | Nilo-Saharan        | Eastern Sudanic            | OKI                     | Herder          |                                              |
| Akie                | 23     | 16       | Africa    | Eastern Africa                                            | Tanzania     | -5.0     | 37.5      | Nilo-Saharan        | Eastern Sudanic            | TCC                     | Hunter-Gatherer |                                              |
| Datog               | 54     | 15       | Africa    | Eastern Africa                                            | Tanzania     | -4.5     | 35.5      | Nilo-Saharan        | Eastern Sudanic            | RIM                     | Herder          |                                              |
| Turu                | 32     | 18       | Africa    | Eastern Africa                                            | Tanzania     | -5.0     | 35.0      | Niger-Kordofanian   | Bantoid                    | SUK                     | Mixed Farmer    |                                              |
| Sukuma              | 10     | 13       | Africa    | Eastern Africa                                            | Tanzania     | -3.0     | 33.5      | Niger-Kordofanian   | Bantoid                    | GOG                     | Mixed Farmer    |                                              |
| Gogo                | 13     | 15       | Africa    | Eastern Africa                                            | Tanzania     | -6.0     | 36.0      | Niger-Kordofanian   | Bantoid                    | MGZ                     | Mixed Farmer    |                                              |
| Mbugwe              | 21     | 18       | Africa    | Eastern Africa                                            | Tanzania     | -3.8     | 35.8      | Niger-Kordofanian   | Bantoid                    | LAG                     | Mixed Farmer    |                                              |
| Rangi               | 36     | 19       | Africa    | Eastern Africa                                            | Tanzania     | -5.0     | 36.0      | Niger-Kordofanian   | Bantoid                    | ASA                     | Mixed Farmer    |                                              |
| Sambaa              | 18     | 14       | Africa    | Eastern Africa                                            | Tanzania     | -4.5     | 38.3      | Niger-Kordofanian   | Bantoid                    | GAX                     | Mixed Farmer    |                                              |
| Pare                | 23     | 18       | Africa    | Eastern Africa                                            | Tanzania     | -4.5     | 38.0      | Niger-Kordofanian   | Bantoid                    | GAX                     | Herder          |                                              |
| Gabra               | 17     | 19       | Africa    | Eastern Africa                                            | Kenya        | 3.0      | 37.5      | Afroasiatic         | Cushitic                   | BOB                     | Herder          |                                              |
| Borana              | 32     | 21       | Africa    | Eastern Africa                                            | Kenya        | 3.0      | 38.0      | Afroasiatic         | Cushitic                   | REL                     | Hunter-Gatherer |                                              |
| Wata                | 6      | 24       | Africa    | Eastern Africa                                            | Kenya        | 3.5      | 37.0      | Afroasiatic         | Cushitic                   | ELO                     | Herder          |                                              |
| Rendille            | 28     | 18       | Africa    | Eastern Africa                                            | Kenya        | 2.3      | 37.5      | Afroasiatic         | Cushitic                   | MUU                     | Hunter-Gatherer |                                              |
| El Molo             | 16     | 18       | Africa    | Eastern Africa                                            | Kenya        | 2.8      | 36.8      | Afroasiatic         | Cushitic                   | MAS                     | Herder          |                                              |
| Yaaku               | 19     | 13       | Africa    | Eastern Africa                                            | Kenya        | 0.5      | 37.0      | Afroasiatic         | Cushitic                   | MWX                     | Herder          |                                              |
| Mumonyot Maasai     | 12     | 13       | Africa    | Eastern Africa                                            | Kenya        | 0.6      | 37.0      | Nilo-Saharan        | Eastern Sudanic            | TUY                     | Herder          |                                              |
| Il'gvesi Maasai     | 21     | 14       | Africa    | Eastern Africa                                            | Kenya        | 0.3      | 36.8      | Nilo-Saharan        | Eastern Sudanic            | SAQ                     | Herder          |                                              |
| Dorobo              | 10     | 16       | Africa    | Eastern Africa                                            | Tanzania     | -5.0     | 37.0      | Nilo-Saharan        | Eastern Sudanic            | ENB                     | Hunter-Gatherer |                                              |
| Tugen               | 22     | 19       | Africa    | Eastern Africa                                            | Kenya        | 0.8      | 35.8      | Nilo-Saharan        | Eastern Sudanic            | OKI                     | Hunter-Gatherer |                                              |
| Samburu             | 18     | 13       | Africa    | Eastern Africa                                            | Kenya        | 1.5      | 37.0      | Nilo-Saharan        | Eastern Sudanic            | SPY                     | Herder          |                                              |
| Marakwet            | 14     | 19       | Africa    | Eastern Africa                                            | Kenya        | 1.3      | 35.5      | Nilo-Saharan        | Eastern Sudanic            | TUV                     | Herder          |                                              |
| Sengwer             | 21     | 18       | Africa    | Eastern Africa                                            | Kenya        | 1.0      | 35.0      | Nilo-Saharan        | Eastern Sudanic            | PKO                     | Herder          |                                              |
| Ogiek               | 22     | 18       | Africa    | Eastern Africa                                            | Kenya        | 0.3      | 36.0      | Nilo-Saharan        | Eastern Sudanic            | MAS                     | Herder          |                                              |
| Nandi               | 11     | 21       | Africa    | Eastern Africa                                            | Kenya        | 0.0      | 35.5      | Nilo-Saharan        | Eastern Sudanic            | LUO                     | Herder          |                                              |
| Sabaot              | 20     | 19       | Africa    | Eastern Africa                                            | Kenya        | 1.0      | 34.8      | Nilo-Saharan        | Eastern Sudanic            | KIK                     | Farmer          | Cann et al. 2002, Rosenberg et al. 2005      |
| Turkana             | 26     | 19       | Africa    | Eastern Africa                                            | Kenya        | 3.0      | 36.0      | Nilo-Saharan        | Eastern Sudanic            | LUY                     | Farmer          |                                              |
| Pokot               | 23     | 19       | Africa    | Eastern Africa                                            | Kenya        | 1.5      | 35.5      | Nilo-Saharan        | Eastern Sudanic            | BLJ                     | Mixed Farmer    |                                              |
| Maasai Ilchamus     | 27     | 19       | Africa    | Eastern Africa                                            | Kenya        | 1.5      | 37.1      | Nilo-Saharan        | Eastern Sudanic            | KXC                     | Mixed Farmer    |                                              |
| Luo                 | 28     | 18       | Africa    | Eastern Africa                                            | Kenya        | -0.5     | 34.5      | Nilo-Saharan        | Eastern Sudanic            | AMH                     | Mixed Farmer    |                                              |
| Kenya Bantu         | 11     | 28       | Africa    | Eastern Africa                                            | Kenya        | -3.0     | 37.0      | Niger-Kordofanian   | Bantoid                    | ENG                     | Farmer          |                                              |
| Kikuyu              | 22     | 21       | Africa    | Eastern Africa                                            | Kenya        | -1.0     | 34.5      | Niger-Kordofanian   | Bantoid                    | XUU                     | Hunter-Gatherer | Cann et al. 2002, Rosenberg et al. 2005      |
| Luhya               | 17     | 19       | Africa    | Eastern Africa                                            | Kenya        | 0.5      | 37.0      | Niger-Kordofanian   | Bantoid                    | XHO                     | Hunter-Gatherer | Mixed Sample, Tishkoff et al. 2007           |
| Burji               | 24     | 17       | Africa    | Eastern Africa                                            | Ethiopia     | 5.5      | 37.8      | Afroasiatic         | Cushitic                   | VEN                     | Mixed Farmer    |                                              |
| Konso               | 14     | 17       | Africa    | Eastern Africa                                            | Ethiopia     | 5.5      | 37.5      | Afroasiatic         | Cushitic                   | MIX                     | Mixed Farmer    |                                              |
| Beta Israel         | 17     | 19       | Africa    | Eastern Africa                                            | Ethiopia     | 12.0     | 38.0      | Afroasiatic         | Semitic                    | MIX                     | Mixed Farmer    |                                              |
| Cape Mixed Ancestry | 39     | 27       | Africa    | Southern Africa                                           | South Africa | -34.0    | 18.5      |                     |                            | ENG                     | Hunter-Gatherer |                                              |
| San                 | 6      | 27       | Africa    | Southern Africa                                           | Namibia      | -21.0    | 20.0      | Khoesan             | Southern                   | XUU                     | Hunter-Gatherer |                                              |
| IXun/Khoe           | 8      | 28       | Africa    | Southern Africa                                           | South Africa | -30.0    | 18.0      | Khoesan             | Southern                   | XHO                     | Mixed Farmer    |                                              |
| Xhosa               | 28     | 22       | Africa    | Southern Africa                                           | South Africa | -32.0    | 28.0      | Niger-Kordofanian   | Bantoid                    | MIX                     | Mixed Farmer    |                                              |
| Venda               | 13     | 27       | Africa    | Southern Africa                                           | South Africa | -22.5    | 30.0      | Niger-Kordofanian   | Bantoid                    | MIX                     | Mixed Farmer    |                                              |
| South Bantu         | x      | 8        | Africa    | Southern Africa                                           | South Africa | -25.6    | 24.3      | Niger-Kordofanian   | Bantoid                    | MIX                     | Mixed Farmer    | Cann et al. 2002, Rosenberg et al. 2005      |
| Chicago             | 15     | 14       |           |                                                           | U.S.A.       |          |           |                     |                            | ENG                     |                 |                                              |
| Pittsburgh          | 21     | 13       |           |                                                           | U.S.A.       |          |           |                     |                            | ENG                     |                 |                                              |
| Baltimore           | 44     | 13       |           |                                                           | U.S.A.       |          |           |                     |                            | ENG                     |                 |                                              |
| North Carolina      | 18     | 14       |           |                                                           | U.S.A.       |          |           |                     |                            | ENG                     |                 |                                              |

Table S1. Populations used in the current study

| Population Name | CEPH n | %Missing | Continent | Region (UN Statistics Division geoscheme with exceptions) | Country                                     | Latitude         | Longitude | Language Family | Language Major Subgrouping | ISO 639-3 Language Code | Subsistence     | Notes                                   |
|-----------------|--------|----------|-----------|-----------------------------------------------------------|---------------------------------------------|------------------|-----------|-----------------|----------------------------|-------------------------|-----------------|-----------------------------------------|
| Orcadian        | x      | 15       | 27        | Eurasia                                                   | Northern Europe                             | U.K.             | 59.0      | -3.0            |                            |                         |                 | Cann et al. 2002, Rosenberg et al. 2005 |
| Adygei          | x      | 17       | 27        | Eurasia                                                   | Eastern Europe                              | Russia           | 44.0      | 39.0            |                            |                         |                 | Cann et al. 2002, Rosenberg et al. 2005 |
| Russian         | x      | 25       | 31        | Eurasia                                                   | Eastern Europe                              | Russia           | 61.0      | 40.0            |                            |                         |                 | Cann et al. 2002, Rosenberg et al. 2005 |
| Basque          | x      | 24       | 28        | Eurasia                                                   | Western Europe                              | France           | 43.0      | 0.0             |                            |                         |                 | Cann et al. 2002, Rosenberg et al. 2005 |
| French          | x      | 28       | 28        | Eurasia                                                   | Western Europe                              | France           | 46.0      | 2.0             |                            |                         |                 | Cann et al. 2002, Rosenberg et al. 2005 |
| Italian         | x      | 21       | 28        | Eurasia                                                   | Southern Europe                             | Italy            | 44.5      | 10.5            |                            |                         |                 | Cann et al. 2002, Rosenberg et al. 2005 |
| Sardinian       | x      | 28       | 28        | Eurasia                                                   | Southern Europe                             | Italy            | 40.0      | 9.0             |                            |                         |                 | Cann et al. 2002, Rosenberg et al. 2005 |
| Bedouin         | x      | 46       | 27        | Eurasia                                                   | Western Asia                                | Israel           | 31.0      | 35.0            |                            |                         |                 | Cann et al. 2002, Rosenberg et al. 2005 |
| Druze           | x      | 42       | 28        | Eurasia                                                   | Western Asia                                | Israel           | 32.0      | 35.0            |                            |                         |                 | Cann et al. 2002, Rosenberg et al. 2005 |
| Palestinian     | x      | 46       | 28        | Eurasia                                                   | Western Asia                                | Israel           | 32.0      | 35.0            |                            |                         |                 | Cann et al. 2002, Rosenberg et al. 2005 |
| Temani          | x      | 21       | 24        | Eurasia                                                   | Western Asia                                | Yemen            | 15.0      | 45.0            | Afroasiatic                | Semitic                 | JYE             |                                         |
| Balochi         | x      | 24       | 28        | Eurasia                                                   | Southern Asia                               | Pakistan         | 30.5      | 66.5            |                            |                         |                 | Cann et al. 2002, Rosenberg et al. 2005 |
| Brahui          | x      | 25       | 28        | Eurasia                                                   | Southern Asia                               | Pakistan         | 30.5      | 66.5            | Dravidian                  |                         | BRH             | Cann et al. 2002, Rosenberg et al. 2005 |
| Makrani         | x      | 25       | 28        | Eurasia                                                   | Southern Asia                               | Pakistan         | 25.0      | 20.0            |                            |                         |                 | Cann et al. 2002, Rosenberg et al. 2005 |
| Sindhi          | x      | 24       | 27        | Eurasia                                                   | Southern Asia                               | Pakistan         | 26.0      | 69.0            |                            |                         |                 | Cann et al. 2002, Rosenberg et al. 2005 |
| Pathan          | x      | 24       | 27        | Eurasia                                                   | Southern Asia                               | Pakistan         | 25.0      | 20.0            |                            |                         |                 | Cann et al. 2002, Rosenberg et al. 2005 |
| Burusho         | x      | 25       | 27        | Eurasia                                                   | Southern Asia                               | Pakistan         | 36.5      | 74.0            |                            |                         |                 | Cann et al. 2002, Rosenberg et al. 2005 |
| Hazara          | x      | 22       | 29        | Eurasia                                                   | Southern Asia                               | Pakistan         | 33.5      | 70.0            |                            |                         |                 | Cann et al. 2002, Rosenberg et al. 2005 |
| Uygur           | x      | 10       | 28        | Eurasia                                                   | Eastern Asia                                | China            | 44.0      | 81.0            |                            |                         |                 | Cann et al. 2002, Rosenberg et al. 2005 |
| Kalash          | x      | 23       | 28        | Eurasia                                                   | Southern Asia                               | Pakistan         | 36.0      | 71.5            |                            |                         |                 | Cann et al. 2002, Rosenberg et al. 2005 |
| Parsi           |        | 25       | 11        | Eurasia                                                   | Southern Asia                               | India            | 19.0      | 72.8            |                            |                         |                 | Rosenberg et al. 2006                   |
| Kashmiri        |        | 25       | 11        | Eurasia                                                   | Southern Asia                               | India            | 32.4      | 74.5            |                            |                         |                 | Rosenberg et al. 2006                   |
| Punjabi         |        | 28       | 12        | Eurasia                                                   | Southern Asia                               | India            | 30.5      | 75.3            |                            |                         |                 | Rosenberg et al. 2006                   |
| Hindi           |        | 28       | 11        | Eurasia                                                   | Southern Asia                               | India            | 27.0      | 78.4            |                            |                         |                 | Rosenberg et al. 2006                   |
| Marwari         |        | 25       | 11        | Eurasia                                                   | Southern Asia                               | India            | 26.7      | 74.3            |                            |                         |                 | Rosenberg et al. 2006                   |
| Gujarati        |        | 50       | 11        | Eurasia                                                   | Southern Asia                               | India            | 23.0      | 72.0            |                            |                         |                 | Rosenberg et al. 2006                   |
| Marathi         |        | 26       | 11        | Eurasia                                                   | Southern Asia                               | India            | 19.8      | 75.9            |                            |                         |                 | Rosenberg et al. 2006                   |
| Kannada         |        | 24       | 11        | Eurasia                                                   | Southern Asia                               | India            | 15.0      | 75.0            |                            |                         |                 | Rosenberg et al. 2006                   |
| Konkani         |        | 42       | 11        | Eurasia                                                   | Southern Asia                               | India            | 14.6      | 75.1            |                            |                         |                 | Rosenberg et al. 2006                   |
| Malayalam       |        | 25       | 11        | Eurasia                                                   | Southern Asia                               | India            | 10.0      | 76.3            |                            |                         |                 | Rosenberg et al. 2006                   |
| Tamil           |        | 29       | 11        | Eurasia                                                   | Southern Asia                               | India            | 11.1      | 78.0            |                            |                         |                 | Rosenberg et al. 2006                   |
| Telugu          |        | 27       | 11        | Eurasia                                                   | Southern Asia                               | India            | 15.9      | 79.6            |                            |                         |                 | Rosenberg et al. 2006                   |
| Oriya           |        | 26       | 11        | Eurasia                                                   | Southern Asia                               | India            | 20.0      | 85.0            |                            |                         |                 | Rosenberg et al. 2006                   |
| Bengali         |        | 27       | 11        | Eurasia                                                   | Southern Asia                               | India            | 23.3      | 87.7            |                            |                         |                 | Rosenberg et al. 2006                   |
| Assamese        |        | 25       | 11        | Eurasia                                                   | Southern Asia                               | India            | 26.0      | 93.0            |                            |                         |                 | Rosenberg et al. 2006                   |
| Han             | x      | 44       | 28        | Eurasia                                                   | Eastern Asia                                | China            | 32.5      | 114.0           |                            |                         |                 | Cann et al. 2002, Rosenberg et al. 2005 |
| Dai             | x      | 10       | 28        | Eurasia                                                   | Eastern Asia                                | China            | 21.0      | 100.0           |                            |                         |                 | Cann et al. 2002, Rosenberg et al. 2005 |
| Daur            | x      | 10       | 28        | Eurasia                                                   | Eastern Asia                                | China            | 48.5      | 124.0           |                            |                         |                 | Cann et al. 2002, Rosenberg et al. 2005 |
| Hezhen          | x      | 9        | 28        | Eurasia                                                   | Eastern Asia                                | China            | 47.5      | 133.5           |                            |                         |                 | Cann et al. 2002, Rosenberg et al. 2005 |
| Lahu            | x      | 8        | 28        | Eurasia                                                   | Eastern Asia                                | China            | 22.0      | 100.0           |                            |                         |                 | Cann et al. 2002, Rosenberg et al. 2005 |
| Miao            | x      | 10       | 27        | Eurasia                                                   | Eastern Asia                                | China            | 28.0      | 109.0           |                            |                         |                 | Cann et al. 2002, Rosenberg et al. 2005 |
| Oroqen          | x      | 9        | 27        | Eurasia                                                   | Eastern Asia                                | China            | 50.5      | 126.5           |                            |                         |                 | Cann et al. 2002, Rosenberg et al. 2005 |
| She             | x      | 10       | 28        | Eurasia                                                   | Eastern Asia                                | China            | 27.0      | 119.0           |                            |                         |                 | Cann et al. 2002, Rosenberg et al. 2005 |
| Tujia           | x      | 10       | 29        | Eurasia                                                   | Eastern Asia                                | China            | 29.0      | 109.0           |                            |                         |                 | Cann et al. 2002, Rosenberg et al. 2005 |
| Tu              | x      | 10       | 27        | Eurasia                                                   | Eastern Asia                                | China            | 36.0      | 101.0           |                            |                         |                 | Cann et al. 2002, Rosenberg et al. 2005 |
| Xibo            | x      | 9        | 28        | Eurasia                                                   | Eastern Asia                                | China            | 43.5      | 81.5            |                            |                         |                 | Cann et al. 2002, Rosenberg et al. 2005 |
| Yi              | x      | 10       | 27        | Eurasia                                                   | Eastern Asia                                | China            | 28.0      | 103.0           |                            |                         |                 | Cann et al. 2002, Rosenberg et al. 2005 |
| Mongola         | x      | 10       | 28        | Eurasia                                                   | Eastern Asia                                | China            | 48.5      | 119.0           |                            |                         |                 | Cann et al. 2002, Rosenberg et al. 2005 |
| Naxi            | x      | 9        | 28        | Eurasia                                                   | Eastern Asia                                | China            | 26.0      | 100.0           |                            |                         |                 | Cann et al. 2002, Rosenberg et al. 2005 |
| Cambodian       | x      | 10       | 29        | Eurasia                                                   | Southeastern Asia                           | Cambodia         | 12.0      | 105.0           |                            |                         |                 | Cann et al. 2002, Rosenberg et al. 2005 |
| Japanese        | x      | 29       | 28        | Eurasia                                                   | Eastern Asia                                | Japan            | 38.0      | 138.0           |                            |                         |                 | Cann et al. 2002, Rosenberg et al. 2005 |
| Yakut           | x      | 25       | 28        | Eurasia                                                   | Eastern Asia (deviation from UN clatRussia) | Russia           | 63.0      | 129.5           |                            |                         |                 | Cann et al. 2002, Rosenberg et al. 2005 |
| Melanesian      | x      | 11       | 28        | Oceania                                                   | Melanesia                                   | Papua New Guinea |           |                 |                            |                         |                 | Cann et al. 2002, Rosenberg et al. 2005 |
| Papuan          | x      | 17       | 28        | Oceania                                                   | Melanesia                                   | Papua New Guinea |           |                 |                            |                         |                 | Cann et al. 2002, Rosenberg et al. 2005 |
| Australian      |        | 10       | 13        | Oceania                                                   | Australia                                   | Australia        |           |                 |                            |                         | Hunter-Gatherer |                                         |
| Karitiana       | x      | 14       | 29        | America                                                   | South America                               | Brazil           |           |                 |                            |                         |                 | Cann et al. 2002, Rosenberg et al. 2005 |
| Surui           | x      | 8        | 30        | America                                                   | South America                               | Brazil           |           |                 |                            |                         |                 | Cann et al. 2002, Rosenberg et al. 2005 |
| Columbian       | x      | 7        | 28        | America                                                   | South America                               | Columbia         |           |                 |                            |                         |                 | Cann et al. 2002, Rosenberg et al. 2005 |
| Maya            | x      | 21       | 30        | America                                                   | Central America                             | Mexico           |           |                 |                            |                         |                 | Cann et al. 2002, Rosenberg et al. 2005 |
| Pima            | x      | 14       | 29        | America                                                   | Central America                             | Mexico           |           |                 |                            |                         |                 | Cann et al. 2002, Rosenberg et al. 2005 |

**Table S2a. Allele length adjustments between the CEPH-HGDP data and the Africa1 dataset**

| <b>ID, previous (CEPH-HGDP)</b> | <b>ID, new (Africa1)</b> | <b>adjustment (bp, added to previous length)</b> | <b>Other ID</b> |
|---------------------------------|--------------------------|--------------------------------------------------|-----------------|
| ATA31G11                        | ATA31G11P                | 7                                                | D10S1412        |
| UT2095                          | UT2095M                  | 1                                                | D11S1304        |
| GATA6B09                        | GATA6B09P                | 7                                                | D11S1392        |
| GGAA17G05                       | GGAA17G05P               | 7                                                | D11S1984        |
| GATA23E06                       | GATA23E06L               | 3                                                | D11S1998        |
| GATA23F06                       | GATA23F06L               | 3                                                | D11S1999        |
| GATA28D01                       | GATA28D01M               | 1                                                | D11S2000        |
| ATA27A06                        | ATA27A06P                | 7                                                | D12S1042        |
| ATA29A06                        | ATA29A06P                | 7                                                | D12S1045        |
| GATA26D02                       | GATA26D02M               | 1                                                | D12S1052        |
| GATA63D12                       | GATA63D12P               | 7                                                | D12S1064        |
| GATA85A04                       | GATA85A04M               | 1                                                | D12S1300        |
| GATA91H06                       | GATA91H06M               | 1                                                | D12S1301        |
| ATA25F09                        | ATA25F09M                | 1                                                | D12S2070        |
| GATA11C08                       | GATA11C08P               | 7                                                | D13S1807        |
| GATA23C03                       | GATA23C03P               | 7                                                | D13S787         |
| GATA51B02                       | GATA51B02M               | 1                                                | D13S796         |
| GATA136B01                      | GATA136B01M              | 1                                                | D14S1426        |
| GGAA10C09                       | GGAA10C09P               | 7                                                | D14S587         |
| GATA43H01                       | GATA43H01M               | 1                                                | D14S608         |
| GGAA21G11                       | GGAA21G11L               | 2                                                | D14S617         |
| GATA197B10                      | GATA197B10P              | 7                                                | D15S1515        |
| ATA28G05                        | ATA28G05P                | 7                                                | D15S655         |
| GATA73F01                       | GATA73F01M               | 1                                                | D15S816         |
| GATA81D12                       | GATA81D12M               | 1                                                | D16S2624        |
| GATA22F09                       | GATA22F09P               | 7                                                | D16S3253        |
| GAAT2C03                        | GAAT2C03P                | 7                                                | D17S1298        |
| ATC6A06                         | ATC6A06M                 | 1                                                | D17S2180        |
| ATA43A10Z                       | ATA43A10M                | 1                                                | D17S2193        |
| ATA58A02                        | ATA58A02P                | 7                                                | D17S2195        |
| GATA29B01                       | GATA29B01L               | -1                                               | D19S589         |
| GATA44F10                       | GATA44F10P               | 7                                                | D19S591         |
| GATA26G09                       | GATA26G09P               | 7                                                | D1S1596         |
| GGAA3A07                        | GGAA3A07M                | 1                                                | D1S1612         |
| ATA25E07                        | ATA25E07M                | 1                                                | D1S1627         |
| ATA29C07                        | ATA29C07L                | -2                                               | D1S3462         |
| GATA29A05                       | GATA29A05P               | 7                                                | D1S3669         |
| GATA29F06                       | GATA29F06z               | 1                                                | D20S477         |
| UT1355                          | UT1355z                  | -1                                               | D21S1411        |
| GGAA10F06                       | GGAA10F06M               | 1                                                | D22S686         |
| ATA27D04                        | ATA27D04P                | 7                                                | D2S1352         |
| GATA52A04                       | GATA52A04M               | 1                                                | D2S1384         |
| GATA65C03                       | GATA65C03M               | 1                                                | D2S1391         |
| GATA69E12                       | GATA69E12M               | 1                                                | D2S1394         |
| GGAA20G10                       | GGAA20G10M               | 1                                                | D2S1400         |
| GATA86E02                       | GATA86E02P               | 7                                                | D2S1788         |
| GATA30E06                       | GATA30E06P               | 7                                                | D2S2944         |
| GATA178G09                      | GATA178G09M              | 1                                                | D2S2968         |
| GATA3C02                        | GATA3C02M                | 1                                                | D3S1744         |
| GATA8B05                        | GATA8B05M                | 1                                                | D3S1768         |
| GGAA4B09                        | GGAA4B09N                | 1                                                | D3S2403         |
| GATA22F11                       | GATA22F11NZ              | -58                                              | D3S2427         |
| GATA27C08                       | GATA27C08P               | 7                                                | D3S2432         |
| GATA128C02                      | GATA128C02M              | 1                                                | D3S4529         |
| GATA164B08                      | GATA164B08P              | 7                                                | D3S4545         |
| GATA7D01                        | GATA7D01ZP               | -37                                              | D4S1627         |
| GATA5B02                        | GATA5B02M                | 1                                                | D4S1652         |

**Table S2a. Allele length adjustments between the CEPH-HGDP data and the Africa1 dataset**

| <b>ID, previous (CEPH-HGDP)</b> | <b>ID, new (Africa1)</b> | <b>adjustment (bp, added to previous length)</b> | <b>Other ID</b> |
|---------------------------------|--------------------------|--------------------------------------------------|-----------------|
| GATA22G05                       | GATA22G05M               | 1                                                | D4S2366         |
| ATA27C07                        | ATA27C07P                | 7                                                | D4S2397         |
| GATA42H02                       | GATA42H02P               | 8                                                | D4S2417         |
| GATA11A11                       | GATA11A11P               | 7                                                | D5S1456         |
| GATA3H06                        | GATA3H06M                | 1                                                | D5S1462         |
| GATA7C06                        | GATA7C06M                | 1                                                | D5S1470         |
| ATA23A10                        | ATA23A10M                | 1                                                | D5S1480         |
| GATA89G08                       | GATA89G08z               | -27                                              | D5S1725         |
| ATA20G07                        | ATA20G07M                | 1                                                | D5S2488         |
| GGAT3H10                        | GGAT3H10M                | 1                                                | D6S1017         |
| ATA11D10                        | ATA11D10M                | 1                                                | D6S1021         |
| ATA22G07                        | ATA22G07P                | 7                                                | D6S1027         |
| GATA165G02                      | GATA165G02M              | 1                                                | D6S2436         |
| GATA41G07                       | GATA41G07M               | 1                                                | D7S1802         |
| GATA24D12                       | GATA24D12P               | 7                                                | D7S1818         |
| GATA73D10                       | GATA73D10L               | -4                                               | D7S2204         |
| GATA189C06                      | GATA189C06M              | 1                                                | D7S3070         |
| UT7129                          | UT7129L                  | -1                                               | D8S1048         |
| GATA8G10                        | GATA8G10M                | 1                                                | D8S1110         |
| GATA26E03                       | GATA26E03M               | 1                                                | D8S1132         |
| GGAA20C10                       | GGAA20C10M               | 1                                                | D8S1477         |
| UT721                           | UT721M                   | 1                                                | D8S373          |
| GATA6B02                        | GATA6B02P                | 7                                                | D8S592          |
| GATA81C04                       | GATA81C04M               | 1                                                | D9S1120         |
| GATA62F03                       | GATA62F03M               | 1                                                | D9S2169         |
| ATA18A07                        | ATA18A07M                | 1                                                | D9S910          |
| GATA178F11                      | GATA178F11z              | -67                                              | NA-D18S-1       |
| GATA133A08                      | GATA133A08Q              | 4                                                | NA-D1S-3        |
| ATA42G12                        | ATA42G12M                | 1                                                | NA-D1S-4        |
| SRA                             | SraP                     | 7                                                | TPO-D2S         |

**Table S2b. Allele length adjustments between the Africa1 dataset and the Africa 2-4 datasets**

| <b>ID, previous</b> | <b>ID, new</b> | <b>adjustment</b> |
|---------------------|----------------|-------------------|
| AATA019             | AATA019ZP      | -131              |
| ATA70B03P           | ATA70B03ZP     | -124              |
| AFM248VC5           | 248VC5ZP       | -135              |
| AFM273YF9           | 273yf9P        | -5                |
| GATA109             | GATA109Z       | -130              |
| GATA66D01           | GATA66D01ZP    | -110              |
| GATA23D03N          | GATA23D03ZP    | -107              |
| GATA3C02M           | GATA3C02ZP     | -25               |
| 079yg5P             | 079YG5ZP       | 124               |
| TTTAT002Z           | tttat002       | 124               |
| GATA72G09N          | GATA72G09Z     | 25                |
| GATA62A12           | GATA62A12Z     | -35               |
| 165zf8P             | 165zf8ZP       | 90                |
| GATA138B05          | GATA138B05ZP   | 49                |
| ATA50C05            | ATA50C05ZP     | 116               |
| 035xb9              | 035xb9ZP       | -70               |
| GATA24F03           | GATA24F03ZP    | 7                 |
| GATA13G11           | GATA13G11ZP    | 45                |
| AATA019             | AATA019ZP      | -131              |
| ATT070              | ATT070Z        | 93                |
| GGAA20C10M          | GGAA20C10Z     | -103              |
| GATA84C01           | GATA84C01ZP    | -39               |
| ATA21A03            | ATA21A03Z      | 73                |
| ATA27C11            | ATA27C11ZP     | 78                |
| ATA27A06P           | ATA27A06N      | 7                 |
| GATA51B02M          | GATA51B02ZP    | -45               |
| GGAA22G01           | GGAA22G01ZP    | 17                |
| ATA70B03P           | ATA70B03ZP     | -124              |
| ATA77F05            | ATA77F05Z      | 74                |
| GGAA30H04           | GGAA30H04ZP    | -103              |
| GATA169E06          | GATA169E06ZP   | 38                |
| ATAC026P            | ATAC026        | 7                 |
| AFM273YF9           | 273yf9P        | -5                |
| AFM248VC5           | 248VC5ZP       | -135              |
| 204zg5P             | 204ZG5ZP       | 115               |
| AAT107              | AAT107Z        | -53               |
| 095tc5P             | 095TC5ZP       | 31                |
| AAT200              | AAT200ZP       | -137              |
| AAT263P             | AAT263ZP       | -127              |
| GATA138B05          | GATA138B05P    | -7                |
| ATA11D10M           | ATA11D10Z      | 26                |



**Table S2c. Allele specific adjustments (only the listed alleles within the locus were changed)**

| <b>marker</b> | <b>from bp</b> | <b>to bp</b> |
|---------------|----------------|--------------|
| GATA88H02N    | 275            | 274          |
| GATA88H02N    | 271            | 270          |
| GATA88H02N    | 267            | 266          |
| GATA88H02N    | 263            | 262          |
| GATA88H02N    | 259            | 258          |
| GATA88H02N    | 255            | 254          |
| GATA88H02N    | 251            | 250          |
| GATA88H02N    | 247            | 246          |
| GATAH05       | 219            | 220          |
| GATAH05       | 223            | 224          |
| GATAH05       | 227            | 228          |
| GATAH05       | 231            | 232          |
| GATAH05       | 235            | 236          |
| GATAH05       | 239            | 240          |
| GATAH05       | 243            | 244          |
| GATAH05       | 247            | 248          |
| GATAH05       | 251            | 252          |
| GATA86E02P    | 181            | 182          |
| GATA86E02P    | 177            | 178          |
| GATA86E02P    | 173            | 174          |
| GATA86E02P    | 169            | 170          |
| GATA86E02P    | 165            | 166          |
| GATA86E02P    | 161            | 162          |
| ATA28B11      | 240            | 239          |
| TAGA031z      | 363            | 362          |
| TAGA031z      | 359            | 358          |
| TAGA031z      | 357            | 356          |
| TAGA031z      | 355            | 354          |
| GGAA10C09P    | 288            | 289          |
| GGAA10C09P    | 284            | 285          |
| GGAA10C09P    | 280            | 281          |
| GGAA10C09P    | 276            | 277          |
| GGAA10C09P    | 272            | 273          |
| GGAA10C09P    | 268            | 269          |
| GGAA10C09P    | 264            | 265          |
| GGAA10C09P    | 260            | 261          |
| GGAA10C09P    | 256            | 257          |
| GGAA10C09P    | 252            | 253          |
| GATA8B01      | 255            | 254          |
| GATA8B01      | 251            | 250          |
| GATA8B01      | 247            | 246          |
| GATA8B01      | 243            | 242          |
| GATA8B01      | 239            | 238          |
| GATA8B01      | 235            | 234          |
| GATA8B01      | 225            | 226          |
| UT5029        | 276            | 277          |
| UT5029        | 272            | 273          |
| UT5029        | 268            | 269          |
| UT5029        | 264            | 265          |
| UT5029        | 260            | 261          |
| ATA33B03Z     | 101            | 100          |
| ATA33B03Z     | 104            | 103          |
| AGAT114       | 326            | 327          |
| AGAT114       | 322            | 323          |

**Table S2c. Allele specific adjustments (only the listed alleles within the locus were changed)**

| <b>marker</b> | <b>from bp</b> | <b>to bp</b> |
|---------------|----------------|--------------|
| AGAT114       | 318            | 319          |
| AGAT114       | 314            | 315          |
| AGAT114       | 310            | 311          |
| AGAT114       | 306            | 307          |
| AGAT114       | 302            | 303          |
| GATA164B08P   | 223            | 224          |
| GATA164B08P   | 219            | 220          |
| GATA164B08P   | 215            | 216          |
| GATA164B08P   | 211            | 212          |
| GATA164B08P   | 207            | 208          |
| GATA164B08P   | 203            | 204          |
| GATA164B08P   | 199            | 200          |
| GATA164B08P   | 195            | 196          |
| GATA164B08P   | 187            | 188          |
| UT1355z       | 283            | 284          |
| UT1355z       | 279            | 280          |
| UT1355z       | 275            | 276          |
| UT1355z       | 271            | 272          |
| UT1355z       | 267            | 268          |
| GATA91H06M    | 98             | 97           |

Table S3. Analysis of Molecular Variance (AMOVA) by regions for 848 STRs using GDA

| Continent | Variance Components and 95% confidence intervals (%) |             |        |                                                             |                     | # STRs |
|-----------|------------------------------------------------------|-------------|--------|-------------------------------------------------------------|---------------------|--------|
|           | <i>n</i>                                             | Populations | Group  | Among Populations within Regions                            | Within Populations  |        |
| Africa    | 105                                                  | 7           | 1      | 2.59 (2.45,2.74)                                            | 97.41 (97.26,97.55) | 783    |
| Africa    | 2527                                                 | 120         | 1      | 1.71 (1.63,1.81)                                            | 98.29 (98.20,98.37) |        |
|           |                                                      |             |        | <b>Region</b>                                               |                     |        |
|           | 990                                                  | 42          | 1      | 1.17 (1.11,1.23)                                            | 98.83 (98.77,98.89) |        |
|           | 243                                                  | 14          | 1      | 1.18 (1.01,1.38)                                            | 98.82 (98.62,99.00) |        |
|           | 1160                                                 | 56          | 1      | 1.31 (1.20,1.43)                                            | 98.69 (98.57,98.80) |        |
|           | 71                                                   | 3           | 1      | 1.29 (1.08,1.52)                                            | 98.71 (98.48,98.92) | 847    |
|           | 63                                                   | 5           | 1      | 2.13 (1.86,2.38)                                            | 97.87 (97.62,98.14) | 845    |
|           |                                                      |             |        | <b>Language Family</b>                                      |                     |        |
|           | 618                                                  | 27          | 1      | 1.29 (1.21,1.38)                                            | 98.71 (98.63,98.79) |        |
|           | 128                                                  | 4           | 1      | 3.39 (3.20,3.58)                                            | 96.61 (96.42,96.81) | 847    |
|           | 1128                                                 | 59          | 1      | 1.17 (1.11,1.26)                                            | 98.83 (98.75,98.89) |        |
|           | 631                                                  | 29          | 1      | 1.13 (0.98,1.31)                                            | 98.87 (98.69,99.02) |        |
|           |                                                      |             |        | <b>Subsistence</b>                                          |                     |        |
|           | 1156                                                 | 57          | 1      | 0.97 (0.84,1.10)                                            | 99.03 (98.90,99.16) |        |
|           | 409                                                  | 21          | 1      | 1.07 (1.00,1.15)                                            | 98.93 (98.85,99.00) |        |
|           | 388                                                  | 16          | 1      | 3.18 (3.06,3.32)                                            | 96.82 (96.68,96.94) |        |
|           | 574                                                  | 26          | 1      | 0.94 (0.84,1.03)                                            | 99.07 (98.97,99.16) | 798    |
| America   | 64                                                   | 5           | 1      | 8.36 (7.97,8.75)                                            | 91.64 (91.25,92.03) | 783    |
| Oceania   | 38                                                   | 3           | 1      | 4.59 (4.17,5.03)                                            | 95.41 (94.97,95.84) | 786    |
| Eurasia   | 1179                                                 | 52          | 1      | 1.97 (1.86,2.09)                                            | 98.03 (97.91,98.14) | 847    |
|           |                                                      |             |        | <b>Region</b>                                               |                     |        |
|           | 1021                                                 | 45          | 1      | 1.94 (1.83,2.05)                                            | 98.06 (97.95,98.18) |        |
|           | 128                                                  | 7           | 1      | 0.74 (0.67,0.82)                                            | 99.26 (99.18,99.33) | 783    |
|           |                                                      |             |        | <b>Variance Components and 95% confidence intervals (%)</b> |                     |        |
| Continent | <i>n</i>                                             | Populations | Groups | Among Populations within Groups                             |                     | # STRs |
|           |                                                      |             |        | Among Groups                                                | Within Populations  |        |
| Africa    | 2527                                                 | 120         | 5      | 0.65 (0.60,0.71)                                            | 98.07 (97.97,98.16) |        |
| Africa    | 2505                                                 | 119         | 4      | 0.62 (0.54,0.69)                                            | 98.08 (97.98,98.19) |        |
| Africa    | 2527                                                 | 120         | 4      | 0.44 (0.41,0.48)                                            | 98.15 (98.05,98.24) |        |

**Table S4. Genetic by geographic distances analysis**

a)

| <b>Model</b>          | <b>N</b> | <b>Spearman's Rho</b> | <b>p-value</b>    |
|-----------------------|----------|-----------------------|-------------------|
| <b>Global Region</b>  |          |                       |                   |
| Africa                | 14042    | 0.40153               | <b>&lt;0.0001</b> |
| Central Asia          | 56       | -0.16600              | 0.2214            |
| Europe                | 56       | 0.82813               | <b>&lt;0.0001</b> |
| Middle East           | 12       | 0.88273               | <b>0.0001</b>     |
| East Asia             | 272      | 0.33515               | <b>&lt;0.0001</b> |
| India                 | 210      | 0.05653               | 0.4151            |
| <b>African Region</b> |          |                       |                   |
| Eastern Africa        | 1722     | 0.19239               | <b>&lt;0.0001</b> |
| Central Africa        | 2550     | 0.55188               | <b>&lt;0.0001</b> |
| Saharan Africa        | 42       | 0.75968               | <b>&lt;0.0001</b> |
| Southern Africa       | 20       | -0.11515              | 0.6288            |
| Western Africa        | 182      | 0.42623               | <b>&lt;0.0001</b> |

b)

| <b>Correlation1</b> | <b>Correlation2</b> | <b>p-value</b>  |
|---------------------|---------------------|-----------------|
| Eastern Africa      | Central Africa      | <b>4.62E-42</b> |
| Eastern Africa      | Saharan Africa      | <b>7.77E-07</b> |
| Eastern Africa      | Southern Africa     | 0.2027          |
| Eastern Africa      | Western Africa      | <b>0.0009</b>   |
| Central Africa      | Saharan Africa      | <b>0.0203</b>   |
| Central Africa      | Southern Africa     | <b>0.0025</b>   |
| Central Africa      | Western Africa      | <b>0.0321</b>   |
| Saharan Africa      | Southern Africa     | <b>0.0001</b>   |
| Saharan Africa      | Western Africa      | <b>0.0022</b>   |
| Southern Africa     | Western Africa      | <b>0.0245</b>   |
|                     |                     |                 |
| Africa              | Central Asia        | <b>1.65E-05</b> |
| Africa              | Europe              | <b>7.78E-13</b> |
| Africa              | Middle East         | <b>0.0003</b>   |
| Africa              | East Asia           | <b>0.0125</b>   |
| Africa              | India               | <b>8.45E-16</b> |
| Central Asia        | Europe              | <b>3.93E-12</b> |
| Central Asia        | Middle East         | <b>1.61E-05</b> |
| Central Asia        | East Asia           | <b>0.0006</b>   |
| Central Asia        | India               | 0.1454          |
| Europe              | Middle East         | 0.5680          |
| Europe              | East Asia           | <b>2.99E-08</b> |
| Europe              | India               | <b>2.84E-13</b> |
| Middle East         | East Asia           | <b>0.0022</b>   |
| Middle East         | India               | <b>9.29E-05</b> |
| East Asia           | India               | <b>0.0016</b>   |

**Table S5. Regression of genetic distance on language and geography**

|                           | Linguistic Distance <sup>a</sup> R <sup>2</sup> | p-value | Geographic Distance <sup>b</sup> R <sup>2</sup> | p-value | Full model <sup>c</sup> R <sup>2</sup> | Language distance after adjustment p-value <sup>d</sup> | Geographic Distance after adjustment p-value <sup>e</sup> | Full model with Interaction <sup>f</sup> R <sup>2</sup> | Language Distance p-value after interaction adjustment | Geographic Distance p-value after interaction adjustment <sup>h</sup> | Interaction p-value |
|---------------------------|-------------------------------------------------|---------|-------------------------------------------------|---------|----------------------------------------|---------------------------------------------------------|-----------------------------------------------------------|---------------------------------------------------------|--------------------------------------------------------|-----------------------------------------------------------------------|---------------------|
| <b>NK without Pygmies</b> | 0.16                                            | <0.0001 | 0.02                                            | <0.0001 | 0.17                                   | <0.0001                                                 | 0.0003                                                    | 0.17                                                    | <0.0001                                                | 0.0097                                                                | 0.4591              |
| <b>NK with Pygmies</b>    | 0.11                                            | <0.0001 | 0.02                                            | <0.0001 | 0.12                                   | <0.0001                                                 | 0.0002                                                    | 0.12                                                    | <0.0001                                                | 0.0424                                                                | 0.99976             |
| <b>NS</b>                 | 0.06                                            | <0.0001 | 0.21                                            | <0.0001 | 0.22                                   | 0.0051                                                  | <0.0001                                                   | 0.26                                                    | 0.0188                                                 | <0.0001                                                               | 0.0002              |
| <b>AA all</b>             | 0.20                                            | <0.0001 | 0.34                                            | <0.0001 | 0.34                                   | 0.0894                                                  | <0.0001                                                   | 0.37                                                    | 0.1052                                                 | <0.0001                                                               | 0.0006              |
| <b>Chadic only</b>        | 0.0012                                          | 0.7978  | 0.39                                            | <0.0001 | 0.4                                    | 0.6028                                                  | <0.0001                                                   | 0.4                                                     | 0.8315                                                 | 0.0012                                                                | 0.9237              |
| <b>Cushitic only</b>      | 0.29                                            | <0.0001 | 0.27                                            | <0.0001 | 0.29                                   | 0.0863                                                  | 0.6723                                                    | 0.3                                                     | 0.7587                                                 | 0.7874                                                                | 0.1075              |

a - Proportion of variance in genetic distance explained by linguistic distance alone (unadjusted for anything else)

b - Proportion of variance in genetic distance explained by geographic distance alone (unadjusted for anything else)

c - Proportion of variance in genetic distance explained by linguistic distance and geographic distance together in regression model

d - Significance of linguistic distance effect on genetic distance after adjusting for geographic distance

e - Significance of geographic distance on genetic distance effect after adjusting for linguistic distance

f - Proportion of variance in genetic distance explained by linguistic distance, geographic distance, and interaction between geographic and linguistic distance

g - p-value for effect of linguistic distance on genetic distance after adjusting for geography and interaction

h - p-value for effect of geographic distance on genetic distance after adjusting for language and interaction

**Table S6. Proportion of AACs from unsupervised STRUCTURE runs in Cape Mixed Ancestry and African American Populations**

| Populations          | Fulani     | Nillo-Saharan | Oceania     | Chadic-Saharan | Southern African Khoesan | Niger-Kordofanian | East Asia   | Hadza       | Sandawe     | Indian      | Cushitic Pygmy | European    | Native American | n           |
|----------------------|------------|---------------|-------------|----------------|--------------------------|-------------------|-------------|-------------|-------------|-------------|----------------|-------------|-----------------|-------------|
| Cape Mixed Ancestry  | <b>ave</b> | <b>0.01</b>   | <b>0.00</b> | <b>0.01</b>    | <b>0.01</b>              | <b>0.19</b>       | <b>0.08</b> | <b>0.00</b> | <b>0.01</b> | <b>0.20</b> | <b>0.03</b>    | <b>0.01</b> | <b>0.19</b>     | <b>0.01</b> |
|                      | min        | 0.00          | 0.00        | 0.00           | 0.01                     | 0.01              | 0.00        | 0.00        | 0.00        | 0.00        | 0.00           | 0.00        | 0.00            | 0.00        |
|                      | max        | 0.14          | 0.05        | 0.06           | 0.06                     | 0.48              | 0.21        | 0.02        | 0.11        | 0.69        | 0.40           | 0.07        | 0.86            | 0.15        |
| Chicago              | <b>ave</b> | <b>0.03</b>   | <b>0.00</b> | <b>0.00</b>    | <b>0.01</b>              | <b>0.70</b>       | <b>0.01</b> | <b>0.00</b> | <b>0.01</b> | <b>0.04</b> | <b>0.02</b>    | <b>0.01</b> | <b>0.15</b>     | <b>0.00</b> |
|                      | min        | 0.00          | 0.00        | 0.00           | 0.00                     | 0.52              | 0.00        | 0.00        | 0.00        | 0.01        | 0.00           | 0.00        | 0.02            | 0.00        |
|                      | max        | 0.14          | 0.01        | 0.01           | 0.05                     | 0.04              | 0.08        | 0.01        | 0.05        | 0.11        | 0.06           | 0.02        | 0.29            | 0.01        |
| Pittsburgh           | <b>ave</b> | <b>0.01</b>   | <b>0.01</b> | <b>0.00</b>    | <b>0.02</b>              | <b>0.70</b>       | <b>0.01</b> | <b>0.00</b> | <b>0.02</b> | <b>0.04</b> | <b>0.02</b>    | <b>0.01</b> | <b>0.15</b>     | <b>0.01</b> |
|                      | min        | 0.00          | 0.00        | 0.00           | 0.00                     | 0.45              | 0.00        | 0.00        | 0.00        | 0.01        | 0.00           | 0.00        | 0.03            | 0.00        |
|                      | max        | 0.03          | 0.03        | 0.02           | 0.05                     | 0.04              | 0.03        | 0.01        | 0.10        | 0.15        | 0.05           | 0.05        | 0.36            | 0.03        |
| Baltimore            | <b>ave</b> | <b>0.01</b>   | <b>0.01</b> | <b>0.00</b>    | <b>0.01</b>              | <b>0.74</b>       | <b>0.01</b> | <b>0.00</b> | <b>0.02</b> | <b>0.05</b> | <b>0.02</b>    | <b>0.01</b> | <b>0.11</b>     | <b>0.00</b> |
|                      | min        | 0.00          | 0.00        | 0.00           | 0.00                     | 0.54              | 0.00        | 0.00        | 0.00        | 0.01        | 0.00           | 0.00        | 0.00            | 0.00        |
|                      | max        | 0.08          | 0.06        | 0.04           | 0.04                     | 0.03              | 0.08        | 0.05        | 0.10        | 0.17        | 0.10           | 0.07        | 0.29            | 0.03        |
| North Carolina       | <b>ave</b> | <b>0.00</b>   | <b>0.00</b> | <b>0.00</b>    | <b>0.01</b>              | <b>0.69</b>       | <b>0.02</b> | <b>0.00</b> | <b>0.03</b> | <b>0.06</b> | <b>0.02</b>    | <b>0.01</b> | <b>0.15</b>     | <b>0.00</b> |
|                      | min        | 0.00          | 0.00        | 0.00           | 0.00                     | 0.38              | 0.00        | 0.00        | 0.00        | 0.01        | 0.00           | 0.00        | 0.01            | 0.00        |
|                      | max        | 0.03          | 0.01        | 0.01           | 0.06                     | 0.01              | 0.05        | 0.04        | 0.12        | 0.15        | 0.07           | 0.05        | 0.41            | 0.02        |
| All African American | <b>ave</b> | <b>0.01</b>   | <b>0.01</b> | <b>0.00</b>    | <b>0.01</b>              | <b>0.71</b>       | <b>0.01</b> | <b>0.00</b> | <b>0.02</b> | <b>0.05</b> | <b>0.02</b>    | <b>0.01</b> | <b>0.13</b>     | <b>0.00</b> |
|                      | min        | 0.00          | 0.00        | 0.00           | 0.00                     | 0.38              | 0.00        | 0.00        | 0.00        | 0.01        | 0.00           | 0.00        | 0.00            | 0.00        |
|                      | max        | 0.14          | 0.06        | 0.04           | 0.06                     | 0.04              | 0.08        | 0.05        | 0.12        | 0.17        | 0.10           | 0.07        | 0.41            | 0.03        |

**Table S7. Proportion of AACs from supervised STRUCTURE runs in Cape Mixed Ancestry and African American Populations**

| Populations         |            | Fulani      |             | Nilo-Saharan |             | Oceanic     |             | Chadic      |             | SAK         |             | NK non-Bantu |             | NK Bantu    |             | East Asian  |  | Indian |  | Cushitic |  | Pygmy |  | European |  | Native American |  |
|---------------------|------------|-------------|-------------|--------------|-------------|-------------|-------------|-------------|-------------|-------------|-------------|--------------|-------------|-------------|-------------|-------------|--|--------|--|----------|--|-------|--|----------|--|-----------------|--|
|                     |            | Mbororo     | Dinka       | PNG          | Mada        | San         | Mandenka    | Lemanda     | Han         | Hadza       | Iraqw       | Baka         | French      | Pima        |             |             |  |        |  |          |  |       |  |          |  |                 |  |
| Cape Mixed Ancestry | <b>ave</b> | <b>0.02</b> | <b>0.02</b> | <b>0.02</b>  | <b>0.03</b> | <b>0.19</b> | <b>0.04</b> | <b>0.10</b> | <b>0.09</b> | <b>0.01</b> | <b>0.15</b> | <b>0.04</b>  | <b>0.02</b> | <b>0.24</b> | <b>0.01</b> | <b>0.39</b> |  |        |  |          |  |       |  |          |  |                 |  |
|                     | min        | 0.00        | 0.00        | 0.00         | 0.00        | 0.00        | 0.00        | 0.00        | 0.00        | 0.00        | 0.00        | 0.00         | 0.00        | 0.00        | 0.00        | 0.00        |  |        |  |          |  |       |  |          |  |                 |  |
|                     | max        | 0.16        | 0.19        | 0.11         | 0.16        | 0.42        | 0.39        | 0.50        | 0.25        | 0.07        | 0.63        | 0.32         | 0.12        | 0.73        | 0.12        | 0.12        |  |        |  |          |  |       |  |          |  |                 |  |
| Chicago             | <b>ave</b> | <b>0.06</b> | <b>0.03</b> | <b>0.01</b>  | <b>0.08</b> | <b>0.01</b> | <b>0.19</b> | <b>0.44</b> | <b>0.01</b> | <b>0.02</b> | <b>0.02</b> | <b>0.02</b>  | <b>0.10</b> | <b>0.01</b> | <b>0.15</b> |             |  |        |  |          |  |       |  |          |  |                 |  |
|                     | min        | 0.01        | 0.01        | 0.00         | 0.01        | 0.00        | 0.04        | 0.29        | 0.00        | 0.00        | 0.00        | 0.01         | 0.01        | 0.01        | 0.00        |             |  |        |  |          |  |       |  |          |  |                 |  |
|                     | max        | 0.21        | 0.08        | 0.02         | 0.25        | 0.05        | 0.35        | 0.62        | 0.03        | 0.02        | 0.07        | 0.08         | 0.06        | 0.30        | 0.01        |             |  |        |  |          |  |       |  |          |  |                 |  |
| Pittsburgh          | <b>ave</b> | <b>0.04</b> | <b>0.03</b> | <b>0.00</b>  | <b>0.06</b> | <b>0.01</b> | <b>0.21</b> | <b>0.45</b> | <b>0.01</b> | <b>0.03</b> | <b>0.03</b> | <b>0.02</b>  | <b>0.10</b> | <b>0.01</b> | <b>0.21</b> |             |  |        |  |          |  |       |  |          |  |                 |  |
|                     | min        | 0.01        | 0.00        | 0.00         | 0.01        | 0.00        | 0.05        | 0.26        | 0.00        | 0.00        | 0.00        | 0.01         | 0.00        | 0.00        | 0.00        |             |  |        |  |          |  |       |  |          |  |                 |  |
|                     | max        | 0.24        | 0.16        | 0.01         | 0.16        | 0.01        | 0.37        | 0.65        | 0.03        | 0.04        | 0.17        | 0.07         | 0.05        | 0.36        | 0.02        |             |  |        |  |          |  |       |  |          |  |                 |  |
| Baltimore           | <b>ave</b> | <b>0.03</b> | <b>0.03</b> | <b>0.01</b>  | <b>0.07</b> | <b>0.01</b> | <b>0.20</b> | <b>0.50</b> | <b>0.01</b> | <b>0.02</b> | <b>0.02</b> | <b>0.02</b>  | <b>0.06</b> | <b>0.01</b> | <b>0.44</b> |             |  |        |  |          |  |       |  |          |  |                 |  |
|                     | min        | 0.01        | 0.01        | 0.00         | 0.01        | 0.00        | 0.03        | 0.28        | 0.00        | 0.00        | 0.00        | 0.01         | 0.00        | 0.00        | 0.00        |             |  |        |  |          |  |       |  |          |  |                 |  |
|                     | max        | 0.24        | 0.11        | 0.03         | 0.29        | 0.03        | 0.39        | 0.75        | 0.05        | 0.05        | 0.09        | 0.11         | 0.11        | 0.21        | 0.03        |             |  |        |  |          |  |       |  |          |  |                 |  |
| North Carolina      | <b>ave</b> | <b>0.04</b> | <b>0.03</b> | <b>0.00</b>  | <b>0.06</b> | <b>0.01</b> | <b>0.24</b> | <b>0.41</b> | <b>0.01</b> | <b>0.03</b> | <b>0.02</b> | <b>0.02</b>  | <b>0.11</b> | <b>0.01</b> | <b>0.18</b> |             |  |        |  |          |  |       |  |          |  |                 |  |
|                     | min        | 0.01        | 0.00        | 0.00         | 0.00        | 0.00        | 0.10        | 0.08        | 0.00        | 0.00        | 0.00        | 0.01         | 0.00        | 0.00        | 0.00        |             |  |        |  |          |  |       |  |          |  |                 |  |
|                     | max        | 0.20        | 0.21        | 0.01         | 0.15        | 0.03        | 0.41        | 0.63        | 0.04        | 0.06        | 0.09        | 0.08         | 0.06        | 0.39        | 0.04        |             |  |        |  |          |  |       |  |          |  |                 |  |

Table S8. Proportion of AACs from the Global Unsupervised Structure Run at K=14

| Populations    | Continent | Subregion      | Nilo-Saharan |         |         | S.African |         | Niger | East    |       | W.     |         |       | Native American | n     |          |       |
|----------------|-----------|----------------|--------------|---------|---------|-----------|---------|-------|---------|-------|--------|---------|-------|-----------------|-------|----------|-------|
|                |           |                | Fulani       | Saharan | Oceania | Chadic    | Khoesan |       | KhoeSan | Asian | Indian | Sandawe | Hadza |                 |       | Cushitic | Pygmy |
| Banuamir Beja  | Africa    | Saharan Africa | 0.004        | 0.017   | 0.001   | 0.043     | 0.002   | 0.045 | 0.010   | 0.003 | 0.009  | 0.030   | 0.514 | 0.003           | 0.317 | 0.002    | 23    |
| Hadandawa Beja | Africa    | Saharan Africa | 0.006        | 0.022   | 0.001   | 0.058     | 0.001   | 0.040 | 0.008   | 0.003 | 0.006  | 0.021   | 0.492 | 0.004           | 0.335 | 0.002    | 19    |
| Mozabite       | Africa    | Saharan Africa | 0.142        | 0.006   | 0.001   | 0.017     | 0.002   | 0.105 | 0.007   | 0.004 | 0.008  | 0.026   | 0.075 | 0.003           | 0.602 | 0.002    | 29    |
| Mandinka       | Africa    | Western Africa | 0.081        | 0.006   | 0.006   | 0.044     | 0.005   | 0.792 | 0.006   | 0.003 | 0.012  | 0.013   | 0.016 | 0.007           | 0.007 | 0.004    | 22    |
| Dogon          | Africa    | Western Africa | 0.004        | 0.005   | 0.006   | 0.010     | 0.164   | 0.174 | 0.009   | 0.002 | 0.030  | 0.026   | 0.117 | 0.004           | 0.445 | 0.004    | 9     |
| Dioula         | Africa    | Western Africa | 0.006        | 0.003   | 0.006   | 0.035     | 0.001   | 0.904 | 0.004   | 0.003 | 0.008  | 0.014   | 0.007 | 0.003           | 0.005 | 0.002    | 5     |
| Ashanti        | Africa    | Western Africa | 0.005        | 0.009   | 0.001   | 0.025     | 0.003   | 0.901 | 0.004   | 0.003 | 0.012  | 0.009   | 0.011 | 0.009           | 0.008 | 0.002    | 15    |
| Brong          | Africa    | Western Africa | 0.010        | 0.006   | 0.002   | 0.034     | 0.002   | 0.890 | 0.006   | 0.003 | 0.008  | 0.012   | 0.016 | 0.004           | 0.008 | 0.002    | 26    |
| Hausa          | Africa    | Western Africa | 0.019        | 0.007   | 0.003   | 0.048     | 0.002   | 0.864 | 0.006   | 0.002 | 0.008  | 0.011   | 0.016 | 0.005           | 0.007 | 0.002    | 16    |
| Fulani         | Africa    | Western Africa | 0.360        | 0.012   | 0.001   | 0.053     | 0.001   | 0.474 | 0.004   | 0.001 | 0.008  | 0.012   | 0.016 | 0.003           | 0.054 | 0.002    | 4     |
| Yoruba         | Africa    | Western Africa | 0.003        | 0.006   | 0.001   | 0.015     | 0.002   | 0.932 | 0.004   | 0.003 | 0.008  | 0.008   | 0.007 | 0.003           | 0.006 | 0.003    | 25    |
| Yoruba (CEPH)  | Africa    | Western Africa | 0.004        | 0.005   | 0.002   | 0.016     | 0.004   | 0.915 | 0.004   | 0.003 | 0.011  | 0.009   | 0.010 | 0.005           | 0.009 | 0.003    | 22    |
| Igala          | Africa    | Western Africa | 0.001        | 0.005   | 0.001   | 0.013     | 0.002   | 0.931 | 0.003   | 0.003 | 0.009  | 0.010   | 0.010 | 0.005           | 0.004 | 0.003    | 17    |
| Igbo           | Africa    | Western Africa | 0.004        | 0.007   | 0.002   | 0.009     | 0.003   | 0.920 | 0.003   | 0.003 | 0.013  | 0.009   | 0.014 | 0.008           | 0.005 | 0.001    | 28    |
| Gwari          | Africa    | Western Africa | 0.006        | 0.008   | 0.002   | 0.032     | 0.002   | 0.895 | 0.003   | 0.003 | 0.010  | 0.008   | 0.019 | 0.004           | 0.008 | 0.002    | 22    |
| Bassange       | Africa    | Western Africa | 0.002        | 0.004   | 0.001   | 0.030     | 0.003   | 0.913 | 0.005   | 0.004 | 0.006  | 0.009   | 0.009 | 0.003           | 0.006 | 0.004    | 20    |
| Koma           | Africa    | Western Africa | 0.027        | 0.068   | 0.003   | 0.049     | 0.071   | 0.717 | 0.006   | 0.004 | 0.010  | 0.011   | 0.008 | 0.003           | 0.020 | 0.004    | 12    |
| Mada           | Africa    | Central Africa | 0.002        | 0.009   | 0.001   | 0.477     | 0.002   | 0.471 | 0.004   | 0.002 | 0.008  | 0.005   | 0.008 | 0.005           | 0.004 | 0.001    | 28    |
| Ouldeme        | Africa    | Central Africa | 0.004        | 0.004   | 0.001   | 0.471     | 0.002   | 0.477 | 0.003   | 0.003 | 0.006  | 0.006   | 0.009 | 0.006           | 0.005 | 0.002    | 26    |
| Giziga         | Africa    | Central Africa | 0.005        | 0.011   | 0.002   | 0.371     | 0.004   | 0.557 | 0.003   | 0.002 | 0.010  | 0.009   | 0.014 | 0.004           | 0.007 | 0.001    | 24    |
| Mandara        | Africa    | Central Africa | 0.016        | 0.023   | 0.001   | 0.379     | 0.003   | 0.512 | 0.004   | 0.003 | 0.010  | 0.011   | 0.023 | 0.005           | 0.008 | 0.002    | 26    |
| Kotoko         | Africa    | Central Africa | 0.008        | 0.023   | 0.001   | 0.401     | 0.002   | 0.473 | 0.002   | 0.005 | 0.006  | 0.011   | 0.035 | 0.009           | 0.019 | 0.003    | 17    |
| Zulgo          | Africa    | Central Africa | 0.002        | 0.007   | 0.001   | 0.452     | 0.001   | 0.495 | 0.002   | 0.002 | 0.006  | 0.006   | 0.010 | 0.011           | 0.003 | 0.001    | 22    |
| Podokwo        | Africa    | Central Africa | 0.001        | 0.009   | 0.001   | 0.467     | 0.002   | 0.479 | 0.003   | 0.004 | 0.005  | 0.006   | 0.010 | 0.007           | 0.004 | 0.002    | 30    |
| Massa          | Africa    | Central Africa | 0.002        | 0.063   | 0.001   | 0.352     | 0.002   | 0.528 | 0.003   | 0.004 | 0.009  | 0.006   | 0.020 | 0.004           | 0.004 | 0.002    | 15    |
| Hausa          | Africa    | Central Africa | 0.019        | 0.007   | 0.002   | 0.150     | 0.003   | 0.748 | 0.004   | 0.003 | 0.010  | 0.012   | 0.021 | 0.007           | 0.012 | 0.002    | 27    |
| Baggara        | Africa    | Central Africa | 0.085        | 0.075   | 0.002   | 0.265     | 0.002   | 0.360 | 0.007   | 0.002 | 0.010  | 0.019   | 0.113 | 0.006           | 0.051 | 0.002    | 23    |
| Adamawa Fulani | Africa    | Central Africa | 0.289        | 0.008   | 0.001   | 0.176     | 0.002   | 0.449 | 0.004   | 0.002 | 0.008  | 0.013   | 0.016 | 0.004           | 0.025 | 0.004    | 41    |
| Mbororo Fulani | Africa    | Central Africa | 0.627        | 0.002   | 0.001   | 0.016     | 0.001   | 0.283 | 0.005   | 0.001 | 0.006  | 0.013   | 0.016 | 0.002           | 0.026 | 0.002    | 13    |
| Tupuri         | Africa    | Central Africa | 0.003        | 0.027   | 0.001   | 0.325     | 0.002   | 0.590 | 0.003   | 0.002 | 0.008  | 0.008   | 0.019 | 0.005           | 0.007 | 0.002    | 22    |
| Baka           | Africa    | Central Africa | 0.001        | 0.003   | 0.001   | 0.005     | 0.002   | 0.326 | 0.002   | 0.002 | 0.004  | 0.004   | 0.005 | 0.642           | 0.002 | 0.001    | 48    |
| Bakola         | Africa    | Central Africa | 0.001        | 0.002   | 0.001   | 0.005     | 0.003   | 0.366 | 0.002   | 0.003 | 0.008  | 0.005   | 0.004 | 0.596           | 0.002 | 0.001    | 42    |
| Bedzan         | Africa    | Central Africa | 0.002        | 0.002   | 0.000   | 0.004     | 0.002   | 0.536 | 0.002   | 0.004 | 0.004  | 0.006   | 0.006 | 0.427           | 0.003 | 0.002    | 17    |
| Mvae           | Africa    | Central Africa | 0.001        | 0.009   | 0.002   | 0.006     | 0.004   | 0.887 | 0.003   | 0.002 | 0.015  | 0.007   | 0.016 | 0.040           | 0.007 | 0.001    | 24    |
| Ngumba         | Africa    | Central Africa | 0.003        | 0.007   | 0.001   | 0.004     | 0.002   | 0.862 | 0.003   | 0.005 | 0.016  | 0.009   | 0.013 | 0.068           | 0.005 | 0.002    | 27    |
| Zime           | Africa    | Central Africa | 0.001        | 0.008   | 0.001   | 0.018     | 0.003   | 0.852 | 0.003   | 0.005 | 0.022  | 0.008   | 0.013 | 0.059           | 0.005 | 0.002    | 30    |
| Bamoun         | Africa    | Central Africa | 0.003        | 0.011   | 0.001   | 0.010     | 0.003   | 0.919 | 0.003   | 0.002 | 0.011  | 0.007   | 0.015 | 0.009           | 0.005 | 0.001    | 31    |
| Banen          | Africa    | Central Africa | 0.002        | 0.009   | 0.002   | 0.006     | 0.006   | 0.914 | 0.003   | 0.003 | 0.013  | 0.006   | 0.014 | 0.015           | 0.005 | 0.002    | 25    |
| Bafia          | Africa    | Central Africa | 0.002        | 0.005   | 0.001   | 0.010     | 0.004   | 0.914 | 0.004   | 0.004 | 0.013  | 0.007   | 0.011 | 0.017           | 0.005 | 0.002    | 30    |
| Lemande        | Africa    | Central Africa | 0.001        | 0.005   | 0.001   | 0.008     | 0.002   | 0.935 | 0.005   | 0.004 | 0.009  | 0.005   | 0.008 | 0.010           | 0.004 | 0.002    | 26    |
| Batanga        | Africa    | Central Africa | 0.003        | 0.006   | 0.001   | 0.012     | 0.004   | 0.896 | 0.004   | 0.003 | 0.016  | 0.007   | 0.013 | 0.030           | 0.004 | 0.001    | 20    |
| Iyassa         | Africa    | Central Africa | 0.001        | 0.004   | 0.001   | 0.006     | 0.004   | 0.891 | 0.003   | 0.004 | 0.018  | 0.011   | 0.013 | 0.026           | 0.016 | 0.002    | 37    |
| Fang           | Africa    | Central Africa | 0.002        | 0.009   | 0.001   | 0.006     | 0.003   | 0.887 | 0.003   | 0.005 | 0.012  | 0.006   | 0.016 | 0.045           | 0.004 | 0.001    | 19    |
| Mabea          | Africa    | Central Africa | 0.003        | 0.006   | 0.001   | 0.005     | 0.003   | 0.883 | 0.003   | 0.003 | 0.010  | 0.006   | 0.008 | 0.064           | 0.005 | 0.002    | 13    |
| Yambassa       | Africa    | Central Africa | 0.002        | 0.006   | 0.001   | 0.010     | 0.002   | 0.917 | 0.004   | 0.002 | 0.019  | 0.009   | 0.009 | 0.012           | 0.004 | 0.002    | 17    |
| South Tikar    | Africa    | Central Africa | 0.002        | 0.006   | 0.002   | 0.017     | 0.009   | 0.897 | 0.003   | 0.004 | 0.013  | 0.007   | 0.010 | 0.023           | 0.005 | 0.002    | 21    |
| North Tikar    | Africa    | Central Africa | 0.003        | 0.009   | 0.001   | 0.018     | 0.006   | 0.891 | 0.003   | 0.002 | 0.023  | 0.009   | 0.014 | 0.015           | 0.005 | 0.001    | 13    |
| Ntumu          | Africa    | Central Africa | 0.001        | 0.004   | 0.001   | 0.008     | 0.002   | 0.922 | 0.003   | 0.007 | 0.011  | 0.006   | 0.007 | 0.018           | 0.009 | 0.001    | 11    |
| Bulu           | Africa    | Central Africa | 0.001        | 0.005   | 0.001   | 0.008     | 0.005   | 0.901 | 0.002   | 0.004 | 0.013  | 0.010   | 0.011 | 0.030           | 0.006 | 0.001    | 22    |
| Eton           | Africa    | Central Africa | 0.003        | 0.013   | 0.002   | 0.010     | 0.001   | 0.895 | 0.009   | 0.004 | 0.008  | 0.012   | 0.009 | 0.029           | 0.004 | 0.001    | 4     |
| Wimbum         | Africa    | Central Africa | 0.002        | 0.009   | 0.004   | 0.007     | 0.004   | 0.908 | 0.004   | 0.003 | 0.019  | 0.011   | 0.015 | 0.007           | 0.005 | 0.002    | 15    |



Table S8. Proportion of AACs from the Global Unsupervised Structure Run at K=14

| Populations | Continent | Subregion      | Nilo-Saharan |         |         | S.African |         | Niger       |       | East Asian |         | W.     |          |       | Native American | n     |          |
|-------------|-----------|----------------|--------------|---------|---------|-----------|---------|-------------|-------|------------|---------|--------|----------|-------|-----------------|-------|----------|
|             |           |                | Fulani       | Saharan | Oceania | Chadic    | Khoesan | Kordofanian | Asian | Hadza      | Sandawe | Indian | Cushitic | Pygmy |                 |       | European |
| Batie       | Africa    | Central Africa | 0.001        | 0.009   | 0.002   | 0.008     | 0.007   | 0.921       | 0.003 | 0.002      | 0.014   | 0.008  | 0.008    | 0.009 | 0.003           | 0.003 | 16       |
| Ewondo      | Africa    | Central Africa | 0.002        | 0.004   | 0.001   | 0.021     | 0.002   | 0.912       | 0.002 | 0.001      | 0.009   | 0.005  | 0.007    | 0.032 | 0.003           | 0.001 | 3        |
| Kanuri      | Africa    | Central Africa | 0.023        | 0.037   | 0.001   | 0.296     | 0.004   | 0.556       | 0.005 | 0.004      | 0.016   | 0.008  | 0.034    | 0.007 | 0.008           | 0.002 | 31       |
| Biaka       | Africa    | Central Africa | 0.001        | 0.003   | 0.001   | 0.011     | 0.006   | 0.310       | 0.002 | 0.001      | 0.006   | 0.005  | 0.005    | 0.646 | 0.003           | 0.001 | 23       |
| Mbum        | Africa    | Central Africa | 0.003        | 0.014   | 0.002   | 0.132     | 0.004   | 0.809       | 0.002 | 0.003      | 0.007   | 0.006  | 0.010    | 0.003 | 0.004           | 0.002 | 13       |
| Yakoma      | Africa    | Central Africa | 0.001        | 0.020   | 0.002   | 0.123     | 0.008   | 0.749       | 0.008 | 0.004      | 0.014   | 0.013  | 0.012    | 0.043 | 0.004           | 0.001 | 6        |
| Gbaya       | Africa    | Central Africa | 0.002        | 0.022   | 0.001   | 0.086     | 0.003   | 0.822       | 0.004 | 0.003      | 0.006   | 0.011  | 0.020    | 0.012 | 0.006           | 0.002 | 15       |
| Laka        | Africa    | Central Africa | 0.004        | 0.010   | 0.001   | 0.153     | 0.005   | 0.767       | 0.005 | 0.004      | 0.009   | 0.009  | 0.019    | 0.008 | 0.004           | 0.002 | 33       |
| Ngambaye    | Africa    | Central Africa | 0.003        | 0.023   | 0.001   | 0.192     | 0.002   | 0.722       | 0.005 | 0.003      | 0.009   | 0.011  | 0.016    | 0.005 | 0.005           | 0.003 | 30       |
| Kaba        | Africa    | Central Africa | 0.002        | 0.016   | 0.002   | 0.147     | 0.004   | 0.768       | 0.005 | 0.003      | 0.010   | 0.011  | 0.019    | 0.006 | 0.005           | 0.003 | 27       |
| Bulala      | Africa    | Central Africa | 0.009        | 0.127   | 0.001   | 0.404     | 0.003   | 0.342       | 0.004 | 0.003      | 0.009   | 0.012  | 0.061    | 0.004 | 0.019           | 0.002 | 15       |
| Kanembou    | Africa    | Central Africa | 0.006        | 0.060   | 0.004   | 0.311     | 0.005   | 0.408       | 0.002 | 0.002      | 0.011   | 0.023  | 0.112    | 0.003 | 0.051           | 0.003 | 5        |
| Sara        | Africa    | Central Africa | 0.005        | 0.026   | 0.001   | 0.163     | 0.002   | 0.736       | 0.004 | 0.004      | 0.010   | 0.008  | 0.027    | 0.007 | 0.005           | 0.002 | 27       |
| Baluba      | Africa    | Central Africa | 0.002        | 0.014   | 0.001   | 0.006     | 0.003   | 0.909       | 0.006 | 0.003      | 0.012   | 0.007  | 0.007    | 0.025 | 0.003           | 0.002 | 6        |
| Kongo       | Africa    | Central Africa | 0.001        | 0.006   | 0.001   | 0.007     | 0.003   | 0.907       | 0.003 | 0.003      | 0.023   | 0.010  | 0.012    | 0.015 | 0.006           | 0.003 | 17       |
| Barega      | Africa    | Central Africa | 0.002        | 0.013   | 0.001   | 0.030     | 0.041   | 0.826       | 0.002 | 0.009      | 0.042   | 0.010  | 0.009    | 0.011 | 0.002           | 0.002 | 4        |
| Mbuti       | Africa    | Central Africa | 0.000        | 0.031   | 0.001   | 0.006     | 0.568   | 0.134       | 0.001 | 0.005      | 0.011   | 0.003  | 0.007    | 0.230 | 0.002           | 0.001 | 13       |
| Tutsi/Hutu  | Africa    | Central Africa | 0.001        | 0.038   | 0.001   | 0.004     | 0.007   | 0.655       | 0.005 | 0.002      | 0.064   | 0.016  | 0.177    | 0.018 | 0.011           | 0.002 | 8        |
| Dinka       | Africa    | Central Africa | 0.001        | 0.522   | 0.001   | 0.266     | 0.003   | 0.149       | 0.003 | 0.004      | 0.006   | 0.003  | 0.033    | 0.006 | 0.002           | 0.001 | 17       |
| Nuer        | Africa    | Central Africa | 0.002        | 0.531   | 0.001   | 0.239     | 0.004   | 0.142       | 0.003 | 0.003      | 0.010   | 0.009  | 0.042    | 0.008 | 0.004           | 0.002 | 18       |
| Shilluk     | Africa    | Central Africa | 0.002        | 0.499   | 0.001   | 0.233     | 0.002   | 0.198       | 0.003 | 0.008      | 0.006   | 0.005  | 0.034    | 0.004 | 0.003           | 0.001 | 15       |
| Nyimang     | Africa    | Central Africa | 0.010        | 0.375   | 0.001   | 0.267     | 0.022   | 0.154       | 0.003 | 0.002      | 0.011   | 0.009  | 0.121    | 0.005 | 0.018           | 0.002 | 12       |
| Hadza       | Africa    | Eastern Africa | 0.002        | 0.006   | 0.001   | 0.005     | 0.003   | 0.206       | 0.003 | 0.671      | 0.025   | 0.008  | 0.057    | 0.005 | 0.006           | 0.003 | 63       |
| Sandawe     | Africa    | Eastern Africa | 0.002        | 0.008   | 0.001   | 0.007     | 0.004   | 0.171       | 0.003 | 0.006      | 0.688   | 0.011  | 0.083    | 0.004 | 0.010           | 0.002 | 51       |
| Iraqw       | Africa    | Eastern Africa | 0.002        | 0.003   | 0.002   | 0.004     | 0.002   | 0.054       | 0.009 | 0.008      | 0.085   | 0.013  | 0.788    | 0.007 | 0.018           | 0.003 | 46       |
| Burunge     | Africa    | Eastern Africa | 0.003        | 0.013   | 0.001   | 0.005     | 0.007   | 0.248       | 0.007 | 0.014      | 0.285   | 0.013  | 0.375    | 0.016 | 0.010           | 0.002 | 22       |
| Fiome       | Africa    | Eastern Africa | 0.005        | 0.008   | 0.001   | 0.009     | 0.004   | 0.109       | 0.009 | 0.012      | 0.101   | 0.019  | 0.691    | 0.005 | 0.023           | 0.003 | 22       |
| Mbugu       | Africa    | Eastern Africa | 0.002        | 0.007   | 0.002   | 0.011     | 0.003   | 0.293       | 0.005 | 0.003      | 0.034   | 0.018  | 0.605    | 0.004 | 0.012           | 0.003 | 22       |
| Maasai      | Africa    | Eastern Africa | 0.002        | 0.136   | 0.001   | 0.023     | 0.006   | 0.230       | 0.006 | 0.008      | 0.050   | 0.018  | 0.486    | 0.008 | 0.021           | 0.004 | 36       |
| Akie        | Africa    | Eastern Africa | 0.003        | 0.032   | 0.001   | 0.007     | 0.004   | 0.143       | 0.008 | 0.006      | 0.151   | 0.016  | 0.600    | 0.006 | 0.019           | 0.004 | 23       |
| Datog       | Africa    | Eastern Africa | 0.005        | 0.050   | 0.002   | 0.026     | 0.003   | 0.128       | 0.009 | 0.007      | 0.044   | 0.016  | 0.683    | 0.007 | 0.015           | 0.005 | 54       |
| Turu        | Africa    | Eastern Africa | 0.003        | 0.010   | 0.002   | 0.007     | 0.006   | 0.374       | 0.009 | 0.009      | 0.232   | 0.013  | 0.312    | 0.010 | 0.009           | 0.004 | 32       |
| Sukuma      | Africa    | Eastern Africa | 0.002        | 0.023   | 0.004   | 0.003     | 0.011   | 0.677       | 0.006 | 0.016      | 0.106   | 0.010  | 0.125    | 0.006 | 0.008           | 0.002 | 10       |
| Gogo        | Africa    | Eastern Africa | 0.002        | 0.014   | 0.001   | 0.007     | 0.017   | 0.515       | 0.005 | 0.009      | 0.196   | 0.009  | 0.205    | 0.007 | 0.010           | 0.004 | 13       |
| Mbugwe      | Africa    | Eastern Africa | 0.002        | 0.013   | 0.002   | 0.006     | 0.006   | 0.513       | 0.007 | 0.008      | 0.141   | 0.011  | 0.265    | 0.011 | 0.012           | 0.004 | 21       |
| Rangi       | Africa    | Eastern Africa | 0.001        | 0.008   | 0.001   | 0.007     | 0.007   | 0.424       | 0.006 | 0.008      | 0.195   | 0.016  | 0.306    | 0.008 | 0.010           | 0.002 | 36       |
| Sambaa      | Africa    | Eastern Africa | 0.002        | 0.007   | 0.001   | 0.006     | 0.007   | 0.609       | 0.007 | 0.002      | 0.083   | 0.011  | 0.242    | 0.007 | 0.013           | 0.004 | 18       |
| Pare        | Africa    | Eastern Africa | 0.003        | 0.006   | 0.001   | 0.004     | 0.011   | 0.657       | 0.004 | 0.005      | 0.077   | 0.009  | 0.206    | 0.006 | 0.009           | 0.002 | 23       |
| Gabra       | Africa    | Eastern Africa | 0.005        | 0.028   | 0.003   | 0.037     | 0.006   | 0.026       | 0.016 | 0.002      | 0.010   | 0.055  | 0.754    | 0.004 | 0.052           | 0.002 | 17       |
| Borana      | Africa    | Eastern Africa | 0.005        | 0.022   | 0.003   | 0.027     | 0.004   | 0.055       | 0.011 | 0.004      | 0.019   | 0.037  | 0.749    | 0.006 | 0.055           | 0.003 | 32       |
| Wata        | Africa    | Eastern Africa | 0.005        | 0.032   | 0.001   | 0.040     | 0.003   | 0.053       | 0.011 | 0.004      | 0.010   | 0.032  | 0.782    | 0.005 | 0.021           | 0.002 | 6        |
| Rendille    | Africa    | Eastern Africa | 0.002        | 0.033   | 0.002   | 0.028     | 0.002   | 0.042       | 0.005 | 0.002      | 0.006   | 0.036  | 0.743    | 0.003 | 0.089           | 0.006 | 28       |
| El Molo     | Africa    | Eastern Africa | 0.002        | 0.217   | 0.001   | 0.022     | 0.003   | 0.109       | 0.004 | 0.002      | 0.020   | 0.015  | 0.576    | 0.008 | 0.020           | 0.002 | 16       |
| Yaaku       | Africa    | Eastern Africa | 0.002        | 0.113   | 0.001   | 0.011     | 0.003   | 0.098       | 0.005 | 0.002      | 0.026   | 0.014  | 0.694    | 0.006 | 0.018           | 0.006 | 19       |
| Mumonyot    | Africa    | Eastern Africa | 0.009        | 0.182   | 0.001   | 0.017     | 0.005   | 0.156       | 0.005 | 0.011      | 0.030   | 0.016  | 0.535    | 0.007 | 0.023           | 0.002 | 12       |
| Ilgwesi     | Africa    | Eastern Africa | 0.005        | 0.166   | 0.005   | 0.020     | 0.002   | 0.165       | 0.007 | 0.007      | 0.028   | 0.017  | 0.558    | 0.007 | 0.010           | 0.002 | 21       |
| Dorobo      | Africa    | Eastern Africa | 0.003        | 0.154   | 0.004   | 0.017     | 0.004   | 0.160       | 0.005 | 0.008      | 0.078   | 0.012  | 0.531    | 0.009 | 0.012           | 0.003 | 10       |
| Tugen       | Africa    | Eastern Africa | 0.007        | 0.506   | 0.002   | 0.025     | 0.002   | 0.087       | 0.005 | 0.006      | 0.012   | 0.015  | 0.312    | 0.005 | 0.012           | 0.003 | 22       |
| Samburu     | Africa    | Eastern Africa | 0.003        | 0.160   | 0.002   | 0.031     | 0.005   | 0.090       | 0.005 | 0.004      | 0.017   | 0.023  | 0.625    | 0.006 | 0.027           | 0.002 | 18       |
| Marakwet    | Africa    | Eastern Africa | 0.003        | 0.567   | 0.001   | 0.008     | 0.003   | 0.053       | 0.003 | 0.008      | 0.018   | 0.009  | 0.312    | 0.007 | 0.006           | 0.002 | 14       |
| Sengwer     | Africa    | Eastern Africa | 0.002        | 0.531   | 0.002   | 0.019     | 0.003   | 0.069       | 0.008 | 0.004      | 0.014   | 0.008  | 0.323    | 0.007 | 0.009           | 0.002 | 21       |

Table S8. Proportion of AACs from the Global Unsupervised Structure Run at K=14

| Populations         | Continent | Subregion       | Nilotic |         |         |        | S.African |             | Niger |        | East    |       | W.       |       |          | Native |
|---------------------|-----------|-----------------|---------|---------|---------|--------|-----------|-------------|-------|--------|---------|-------|----------|-------|----------|--------|
|                     |           |                 | Fulani  | Saharan | Oceania | Chadic | Khoesan   | Kordofanian | Asian | Indian | Sandawe | Hadza | Cushitic | Pygmy | European |        |
| Okiek               | Africa    | Eastern Africa  | 0.005   | 0.280   | 0.001   | 0.007  | 0.003     | 0.105       | 0.006 | 0.011  | 0.522   | 0.005 | 0.012    | 0.002 | 22       |        |
| Nandi               | Africa    | Eastern Africa  | 0.002   | 0.345   | 0.001   | 0.015  | 0.003     | 0.247       | 0.005 | 0.014  | 0.322   | 0.008 | 0.012    | 0.003 | 11       |        |
| Sabaot              | Africa    | Eastern Africa  | 0.002   | 0.400   | 0.001   | 0.019  | 0.004     | 0.310       | 0.003 | 0.031  | 0.192   | 0.008 | 0.009    | 0.003 | 20       |        |
| Turkana             | Africa    | Eastern Africa  | 0.002   | 0.361   | 0.001   | 0.090  | 0.007     | 0.220       | 0.004 | 0.029  | 0.245   | 0.010 | 0.008    | 0.002 | 26       |        |
| Pokot               | Africa    | Eastern Africa  | 0.002   | 0.544   | 0.001   | 0.029  | 0.006     | 0.069       | 0.003 | 0.014  | 0.306   | 0.007 | 0.008    | 0.001 | 23       |        |
| Maasai Ilchamus     | Africa    | Eastern Africa  | 0.003   | 0.296   | 0.002   | 0.013  | 0.004     | 0.119       | 0.009 | 0.020  | 0.477   | 0.006 | 0.019    | 0.005 | 27       |        |
| Luo                 | Africa    | Eastern Africa  | 0.002   | 0.129   | 0.003   | 0.022  | 0.013     | 0.680       | 0.004 | 0.066  | 0.111   | 0.047 | 0.012    | 0.004 | 28       |        |
| Kenya Bantu         | Africa    | Eastern Africa  | 0.001   | 0.118   | 0.001   | 0.008  | 0.016     | 0.681       | 0.006 | 0.054  | 0.064   | 0.018 | 0.017    | 0.003 | 11       |        |
| Kikuyu              | Africa    | Eastern Africa  | 0.003   | 0.078   | 0.001   | 0.010  | 0.011     | 0.433       | 0.006 | 0.062  | 0.111   | 0.356 | 0.010    | 0.005 | 22       |        |
| Luhya               | Africa    | Eastern Africa  | 0.002   | 0.135   | 0.002   | 0.008  | 0.012     | 0.664       | 0.003 | 0.080  | 0.065   | 0.010 | 0.005    | 0.002 | 17       |        |
| Burji               | Africa    | Eastern Africa  | 0.006   | 0.015   | 0.004   | 0.010  | 0.007     | 0.073       | 0.007 | 0.038  | 0.736   | 0.017 | 0.045    | 0.004 | 24       |        |
| Konso               | Africa    | Eastern Africa  | 0.003   | 0.008   | 0.006   | 0.018  | 0.011     | 0.032       | 0.010 | 0.045  | 0.032   | 0.764 | 0.031    | 0.029 | 14       |        |
| Beta Israel         | Africa    | Eastern Africa  | 0.003   | 0.023   | 0.001   | 0.028  | 0.013     | 0.030       | 0.007 | 0.003  | 0.012   | 0.030 | 0.565    | 0.007 | 17       |        |
| Cape Mixed Ancestry | Africa    | Southern Africa | 0.006   | 0.005   | 0.006   | 0.005  | 0.247     | 0.190       | 0.081 | 0.014  | 0.197   | 0.031 | 0.192    | 0.010 | 39       |        |
| San                 | Africa    | Southern Africa | 0.001   | 0.002   | 0.001   | 0.003  | 0.806     | 0.028       | 0.001 | 0.008  | 0.011   | 0.003 | 0.019    | 0.002 | 6        |        |
| !Xun/Khoe           | Africa    | Southern Africa | 0.001   | 0.007   | 0.001   | 0.003  | 0.689     | 0.181       | 0.001 | 0.003  | 0.007   | 0.091 | 0.003    | 0.001 | 8        |        |
| Xhosa               | Africa    | Southern Africa | 0.002   | 0.004   | 0.001   | 0.004  | 0.367     | 0.566       | 0.003 | 0.002  | 0.011   | 0.009 | 0.008    | 0.013 | 28       |        |
| Venda               | Africa    | Southern Africa | 0.002   | 0.002   | 0.002   | 0.006  | 0.173     | 0.771       | 0.003 | 0.001  | 0.006   | 0.012 | 0.005    | 0.002 | 13       |        |
| South Bantu         | Africa    | Southern Africa | 0.002   | 0.004   | 0.001   | 0.004  | 0.180     | 0.762       | 0.002 | 0.002  | 0.013   | 0.005 | 0.011    | 0.001 | 8        |        |
| Chicago             |           |                 | 0.028   | 0.004   | 0.002   | 0.012  | 0.007     | 0.702       | 0.012 | 0.002  | 0.012   | 0.036 | 0.022    | 0.006 | 15       |        |
| Pittsburgh          |           |                 | 0.006   | 0.006   | 0.002   | 0.015  | 0.008     | 0.700       | 0.009 | 0.003  | 0.018   | 0.045 | 0.019    | 0.008 | 17       |        |
| Baltimore           |           |                 | 0.007   | 0.009   | 0.003   | 0.010  | 0.004     | 0.735       | 0.014 | 0.004  | 0.018   | 0.049 | 0.019    | 0.012 | 21       |        |
| North Carolina      |           |                 | 0.003   | 0.004   | 0.002   | 0.011  | 0.004     | 0.685       | 0.017 | 0.004  | 0.027   | 0.056 | 0.016    | 0.011 | 44       |        |
| Oracadian           | Eurasia   | Northern Europe | 0.001   | 0.001   | 0.002   | 0.002  | 0.004     | 0.007       | 0.007 | 0.001  | 0.003   | 0.127 | 0.003    | 0.002 | 18       |        |
| Adygei              | Eurasia   | Eastern Europe  | 0.001   | 0.001   | 0.002   | 0.002  | 0.001     | 0.007       | 0.034 | 0.001  | 0.003   | 0.244 | 0.005    | 0.001 | 15       |        |
| Russian             | Eurasia   | Eastern Europe  | 0.001   | 0.002   | 0.002   | 0.002  | 0.002     | 0.007       | 0.069 | 0.002  | 0.003   | 0.174 | 0.004    | 0.002 | 42       |        |
| Basque              | Eurasia   | Western Europe  | 0.001   | 0.001   | 0.002   | 0.002  | 0.001     | 0.007       | 0.011 | 0.003  | 0.004   | 0.048 | 0.004    | 0.002 | 46       |        |
| French              | Eurasia   | Western Europe  | 0.001   | 0.002   | 0.003   | 0.002  | 0.001     | 0.007       | 0.016 | 0.002  | 0.005   | 0.101 | 0.004    | 0.002 | 21       |        |
| Italian             | Eurasia   | Southern Europe | 0.002   | 0.003   | 0.003   | 0.002  | 0.002     | 0.008       | 0.014 | 0.002  | 0.005   | 0.086 | 0.007    | 0.002 | 24       |        |
| Sardinian           | Eurasia   | Southern Europe | 0.003   | 0.004   | 0.002   | 0.002  | 0.002     | 0.008       | 0.008 | 0.002  | 0.004   | 0.035 | 0.006    | 0.002 | 28       |        |
| Bedouin             | Eurasia   | Western Asia    | 0.003   | 0.007   | 0.003   | 0.014  | 0.003     | 0.032       | 0.008 | 0.003  | 0.015   | 0.047 | 0.106    | 0.002 | 28       |        |
| Druze               | Eurasia   | Western Asia    | 0.001   | 0.004   | 0.002   | 0.002  | 0.001     | 0.015       | 0.007 | 0.002  | 0.006   | 0.103 | 0.019    | 0.002 | 46       |        |
| Palestinian         | Eurasia   | Western Asia    | 0.006   | 0.004   | 0.003   | 0.013  | 0.003     | 0.027       | 0.012 | 0.002  | 0.012   | 0.094 | 0.061    | 0.004 | 42       |        |
| Temani              | Eurasia   | Western Asia    | 0.003   | 0.002   | 0.001   | 0.005  | 0.003     | 0.014       | 0.008 | 0.003  | 0.007   | 0.056 | 0.120    | 0.002 | 46       |        |
| Balochi             | Eurasia   | Southern Asia   | 0.002   | 0.003   | 0.001   | 0.003  | 0.001     | 0.021       | 0.008 | 0.002  | 0.006   | 0.503 | 0.008    | 0.003 | 21       |        |
| Brahui              | Eurasia   | Southern Asia   | 0.001   | 0.002   | 0.001   | 0.003  | 0.003     | 0.024       | 0.008 | 0.001  | 0.004   | 0.476 | 0.007    | 0.002 | 24       |        |
| Makrani             | Eurasia   | Southern Asia   | 0.001   | 0.003   | 0.003   | 0.004  | 0.006     | 0.038       | 0.013 | 0.003  | 0.013   | 0.465 | 0.014    | 0.006 | 25       |        |
| Sindhi              | Eurasia   | Southern Asia   | 0.001   | 0.002   | 0.005   | 0.002  | 0.001     | 0.032       | 0.011 | 0.001  | 0.005   | 0.606 | 0.007    | 0.003 | 25       |        |
| Pathan              | Eurasia   | Southern Asia   | 0.001   | 0.002   | 0.002   | 0.002  | 0.001     | 0.007       | 0.030 | 0.001  | 0.005   | 0.582 | 0.006    | 0.003 | 24       |        |
| Burusho             | Eurasia   | Southern Asia   | 0.001   | 0.002   | 0.009   | 0.002  | 0.002     | 0.006       | 0.098 | 0.002  | 0.004   | 0.555 | 0.004    | 0.002 | 25       |        |
| Hazara              | Eurasia   | Southern Asia   | 0.001   | 0.002   | 0.003   | 0.001  | 0.001     | 0.006       | 0.427 | 0.001  | 0.004   | 0.227 | 0.005    | 0.002 | 25       |        |
| Uygur               | Eurasia   | Eastern Asia    | 0.001   | 0.001   | 0.002   | 0.001  | 0.001     | 0.007       | 0.454 | 0.002  | 0.003   | 0.235 | 0.003    | 0.001 | 22       |        |
| Kalash              | Eurasia   | Southern Asia   | 0.001   | 0.001   | 0.001   | 0.002  | 0.001     | 0.004       | 0.006 | 0.001  | 0.002   | 0.567 | 0.002    | 0.001 | 10       |        |
| Parsi               | Eurasia   | Southern Asia   | 0.001   | 0.002   | 0.001   | 0.003  | 0.001     | 0.009       | 0.003 | 0.001  | 0.004   | 0.490 | 0.006    | 0.002 | 23       |        |
| Kashmiri            | Eurasia   | Southern Asia   | 0.001   | 0.002   | 0.003   | 0.002  | 0.002     | 0.008       | 0.015 | 0.002  | 0.005   | 0.724 | 0.006    | 0.002 | 25       |        |
| Punjabi             | Eurasia   | Southern Asia   | 0.001   | 0.001   | 0.002   | 0.002  | 0.001     | 0.007       | 0.009 | 0.001  | 0.004   | 0.753 | 0.004    | 0.002 | 25       |        |
| Hindi               | Eurasia   | Southern Asia   | 0.001   | 0.002   | 0.004   | 0.003  | 0.002     | 0.009       | 0.011 | 0.002  | 0.005   | 0.853 | 0.006    | 0.002 | 28       |        |
| Marwari             | Eurasia   | Southern Asia   | 0.001   | 0.001   | 0.003   | 0.003  | 0.001     | 0.007       | 0.009 | 0.001  | 0.004   | 0.929 | 0.006    | 0.002 | 28       |        |
| Gujarat             | Eurasia   | Southern Asia   | 0.001   | 0.002   | 0.002   | 0.002  | 0.001     | 0.007       | 0.011 | 0.002  | 0.003   | 0.929 | 0.005    | 0.002 | 50       |        |
| Marathi             | Eurasia   | Southern Asia   | 0.001   | 0.002   | 0.003   | 0.002  | 0.001     | 0.007       | 0.008 | 0.001  | 0.004   | 0.867 | 0.006    | 0.003 | 26       |        |
| Kannada             | Eurasia   | Southern Asia   | 0.001   | 0.002   | 0.003   | 0.003  | 0.001     | 0.008       | 0.026 | 0.003  | 0.005   | 0.874 | 0.006    | 0.002 | 24       |        |

Table S8. Proportion of AACs from the Global Unsupervised Structure Run at K=14

| Populations | Continent | Subregion         | Nilo-Saharan |         |         |        | S.African |             | Niger |        | East Asian |       | W.       |       |          | Native American | n  |
|-------------|-----------|-------------------|--------------|---------|---------|--------|-----------|-------------|-------|--------|------------|-------|----------|-------|----------|-----------------|----|
|             |           |                   | Fulani       | Saharan | Oceania | Chadic | Khoesan   | Kordofanian | Asian | Indian | Sandawe    | Hadza | Cushitic | Pygmy | European |                 |    |
| Konkani     | Eurasia   | Southern Asia     | 0.001        | 0.002   | 0.001   | 0.002  | 0.001     | 0.006       | 0.011 | 0.001  | 0.004      | 0.866 | 0.005    | 0.002 | 0.096    | 0.002           | 42 |
| Malayalam   | Eurasia   | Southern Asia     | 0.001        | 0.002   | 0.002   | 0.002  | 0.002     | 0.010       | 0.020 | 0.002  | 0.005      | 0.901 | 0.006    | 0.002 | 0.041    | 0.004           | 25 |
| Tamil       | Eurasia   | Southern Asia     | 0.001        | 0.002   | 0.004   | 0.002  | 0.002     | 0.008       | 0.015 | 0.001  | 0.005      | 0.855 | 0.006    | 0.002 | 0.095    | 0.003           | 29 |
| Telugu      | Eurasia   | Southern Asia     | 0.001        | 0.002   | 0.002   | 0.002  | 0.002     | 0.008       | 0.019 | 0.001  | 0.004      | 0.903 | 0.005    | 0.002 | 0.044    | 0.004           | 27 |
| Oriya       | Eurasia   | Southern Asia     | 0.001        | 0.002   | 0.004   | 0.002  | 0.003     | 0.008       | 0.049 | 0.002  | 0.005      | 0.861 | 0.005    | 0.003 | 0.050    | 0.006           | 26 |
| Bengali     | Eurasia   | Southern Asia     | 0.001        | 0.002   | 0.005   | 0.002  | 0.002     | 0.009       | 0.063 | 0.001  | 0.006      | 0.834 | 0.007    | 0.001 | 0.062    | 0.005           | 27 |
| Assamese    | Eurasia   | Southern Asia     | 0.001        | 0.003   | 0.002   | 0.003  | 0.002     | 0.010       | 0.139 | 0.001  | 0.005      | 0.772 | 0.006    | 0.002 | 0.049    | 0.004           | 25 |
| Han         | Eurasia   | Eastern Asia      | 0.001        | 0.002   | 0.003   | 0.002  | 0.001     | 0.007       | 0.934 | 0.001  | 0.004      | 0.022 | 0.005    | 0.002 | 0.009    | 0.007           | 44 |
| Dai         | Eurasia   | Eastern Asia      | 0.001        | 0.001   | 0.002   | 0.002  | 0.001     | 0.009       | 0.923 | 0.003  | 0.003      | 0.034 | 0.004    | 0.002 | 0.009    | 0.004           | 10 |
| Daur        | Eurasia   | Eastern Asia      | 0.001        | 0.001   | 0.003   | 0.001  | 0.001     | 0.005       | 0.896 | 0.001  | 0.003      | 0.045 | 0.003    | 0.002 | 0.022    | 0.016           | 10 |
| Hezhen      | Eurasia   | Eastern Asia      | 0.000        | 0.001   | 0.002   | 0.001  | 0.001     | 0.005       | 0.901 | 0.001  | 0.002      | 0.049 | 0.002    | 0.001 | 0.013    | 0.022           | 9  |
| Lahu        | Eurasia   | Eastern Asia      | 0.001        | 0.002   | 0.001   | 0.002  | 0.001     | 0.007       | 0.920 | 0.001  | 0.006      | 0.032 | 0.006    | 0.002 | 0.017    | 0.003           | 8  |
| Miao        | Eurasia   | Eastern Asia      | 0.001        | 0.001   | 0.007   | 0.001  | 0.001     | 0.004       | 0.947 | 0.002  | 0.002      | 0.021 | 0.003    | 0.002 | 0.006    | 0.003           | 10 |
| Oroqen      | Eurasia   | Eastern Asia      | 0.001        | 0.002   | 0.003   | 0.002  | 0.001     | 0.005       | 0.893 | 0.002  | 0.007      | 0.030 | 0.005    | 0.001 | 0.022    | 0.027           | 9  |
| She         | Eurasia   | Eastern Asia      | 0.001        | 0.001   | 0.001   | 0.001  | 0.001     | 0.005       | 0.963 | 0.001  | 0.002      | 0.011 | 0.004    | 0.001 | 0.005    | 0.003           | 10 |
| Tujia       | Eurasia   | Eastern Asia      | 0.001        | 0.001   | 0.001   | 0.002  | 0.002     | 0.006       | 0.942 | 0.001  | 0.003      | 0.017 | 0.004    | 0.002 | 0.009    | 0.008           | 10 |
| Tu          | Eurasia   | Eastern Asia      | 0.002        | 0.002   | 0.001   | 0.003  | 0.002     | 0.007       | 0.866 | 0.002  | 0.004      | 0.068 | 0.004    | 0.002 | 0.026    | 0.010           | 10 |
| Xibo        | Eurasia   | Eastern Asia      | 0.001        | 0.001   | 0.003   | 0.002  | 0.002     | 0.005       | 0.853 | 0.001  | 0.004      | 0.057 | 0.004    | 0.001 | 0.048    | 0.019           | 9  |
| Yi          | Eurasia   | Eastern Asia      | 0.001        | 0.002   | 0.005   | 0.001  | 0.002     | 0.007       | 0.910 | 0.002  | 0.005      | 0.044 | 0.004    | 0.002 | 0.009    | 0.005           | 10 |
| Mongola     | Eurasia   | Eastern Asia      | 0.001        | 0.002   | 0.002   | 0.002  | 0.001     | 0.008       | 0.849 | 0.001  | 0.008      | 0.062 | 0.004    | 0.003 | 0.040    | 0.019           | 10 |
| Naxi        | Eurasia   | Eastern Asia      | 0.001        | 0.002   | 0.003   | 0.002  | 0.002     | 0.008       | 0.907 | 0.002  | 0.004      | 0.040 | 0.004    | 0.002 | 0.019    | 0.005           | 9  |
| Cambodian   | Eurasia   | Southeastern Asia | 0.002        | 0.002   | 0.017   | 0.002  | 0.004     | 0.011       | 0.820 | 0.001  | 0.004      | 0.089 | 0.014    | 0.002 | 0.025    | 0.007           | 10 |
| Japanese    | Eurasia   | Eastern Asia      | 0.001        | 0.002   | 0.002   | 0.003  | 0.002     | 0.007       | 0.933 | 0.002  | 0.004      | 0.020 | 0.004    | 0.002 | 0.007    | 0.010           | 29 |
| Yakut       | Eurasia   | Eastern Asia      | 0.001        | 0.001   | 0.001   | 0.002  | 0.001     | 0.006       | 0.798 | 0.001  | 0.003      | 0.036 | 0.003    | 0.002 | 0.123    | 0.023           | 25 |
| Melanesian  | Oceania   | Melanesia         | 0.001        | 0.001   | 0.621   | 0.001  | 0.001     | 0.005       | 0.339 | 0.001  | 0.002      | 0.017 | 0.002    | 0.001 | 0.005    | 0.003           | 11 |
| Papuan      | Oceania   | Melanesia         | 0.001        | 0.001   | 0.854   | 0.001  | 0.001     | 0.003       | 0.099 | 0.001  | 0.002      | 0.028 | 0.002    | 0.001 | 0.003    | 0.003           | 17 |
| Australian  | Oceania   | Australia         | 0.001        | 0.002   | 0.440   | 0.002  | 0.001     | 0.005       | 0.142 | 0.001  | 0.005      | 0.234 | 0.004    | 0.001 | 0.161    | 0.001           | 10 |
| Karitiana   | America   | South America     | 0.000        | 0.000   | 0.000   | 0.000  | 0.000     | 0.002       | 0.010 | 0.000  | 0.001      | 0.006 | 0.001    | 0.000 | 0.001    | 0.978           | 14 |
| Surui       | America   | South America     | 0.000        | 0.000   | 0.000   | 0.000  | 0.000     | 0.001       | 0.008 | 0.000  | 0.001      | 0.005 | 0.001    | 0.000 | 0.001    | 0.981           | 8  |
| Colombian   | America   | South America     | 0.000        | 0.001   | 0.001   | 0.001  | 0.001     | 0.004       | 0.143 | 0.001  | 0.001      | 0.036 | 0.002    | 0.002 | 0.013    | 0.794           | 7  |
| Maya        | America   | Central America   | 0.001        | 0.001   | 0.005   | 0.002  | 0.001     | 0.011       | 0.177 | 0.001  | 0.003      | 0.025 | 0.006    | 0.002 | 0.100    | 0.665           | 21 |
| Pima        | America   | Central America   | 0.000        | 0.001   | 0.001   | 0.001  | 0.000     | 0.003       | 0.170 | 0.001  | 0.001      | 0.012 | 0.002    | 0.001 | 0.010    | 0.799           | 14 |
| Maximum     |           |                   | 0.627        | 0.567   | 0.854   | 0.477  | 0.806     | 0.935       | 0.963 | 0.671  | 0.688      | 0.929 | 0.788    | 0.646 | 0.919    | 0.981           |    |

Table S9. Proportion of AACs from the Africa Structure Run at K=14

| Population Name | S. African |        |          |               |              |                |        |              |                |                   |         | n     |         |       |         |
|-----------------|------------|--------|----------|---------------|--------------|----------------|--------|--------------|----------------|-------------------|---------|-------|---------|-------|---------|
|                 | Mbugu      | Chadic | Cushitic | Eastern Bantu | Nilo Saharan | Saharan /Dogon | Fulani | Non-Bantu NK | Khoesan /Mbuti | Niger Kordofanian | Sandawe |       | Sudanic | Hadza | W/Pygmy |
| Beja_Banuamir   | 0.001      | 0.035  | 0.678    | 0.005         | 0.020        | 0.185          | 0.007  | 0.009        | 0.003          | 0.039             | 0.005   | 0.009 | 0.002   | 0.003 | 23      |
| Beja_Hadandawa  | 0.001      | 0.035  | 0.651    | 0.004         | 0.023        | 0.213          | 0.010  | 0.007        | 0.002          | 0.035             | 0.004   | 0.007 | 0.002   | 0.004 | 19      |
| Mozabite        | 0.001      | 0.013  | 0.352    | 0.005         | 0.006        | 0.510          | 0.019  | 0.009        | 0.003          | 0.061             | 0.003   | 0.011 | 0.003   | 0.003 | 29      |
| Mandinka        | 0.003      | 0.045  | 0.022    | 0.006         | 0.008        | 0.005          | 0.025  | 0.373        | 0.006          | 0.481             | 0.007   | 0.013 | 0.002   | 0.007 | 22      |
| Dogon           | 0.218      | 0.009  | 0.007    | 0.004         | 0.006        | 0.551          | 0.001  | 0.007        | 0.036          | 0.115             | 0.038   | 0.005 | 0.001   | 0.002 | 9       |
| Dioula          | 0.001      | 0.050  | 0.018    | 0.006         | 0.006        | 0.003          | 0.005  | 0.138        | 0.002          | 0.728             | 0.006   | 0.029 | 0.002   | 0.004 | 5       |
| Ashanti         | 0.002      | 0.035  | 0.015    | 0.009         | 0.015        | 0.003          | 0.004  | 0.191        | 0.006          | 0.671             | 0.006   | 0.033 | 0.003   | 0.007 | 15      |
| Brong           | 0.001      | 0.043  | 0.021    | 0.006         | 0.010        | 0.002          | 0.009  | 0.222        | 0.003          | 0.644             | 0.004   | 0.028 | 0.002   | 0.004 | 26      |
| Hausa_Nigeria   | 0.004      | 0.086  | 0.029    | 0.010         | 0.015        | 0.005          | 0.019  | 0.044        | 0.004          | 0.711             | 0.008   | 0.055 | 0.002   | 0.007 | 16      |
| Fulani_Nigeria  | 0.001      | 0.070  | 0.089    | 0.009         | 0.021        | 0.029          | 0.376  | 0.020        | 0.003          | 0.308             | 0.005   | 0.064 | 0.001   | 0.003 | 4       |
| Yoruba          | 0.001      | 0.030  | 0.015    | 0.006         | 0.010        | 0.005          | 0.003  | 0.141        | 0.003          | 0.748             | 0.007   | 0.026 | 0.002   | 0.004 | 25      |
| Yoruba          | 0.001      | 0.027  | 0.021    | 0.008         | 0.009        | 0.003          | 0.005  | 0.142        | 0.006          | 0.726             | 0.007   | 0.036 | 0.002   | 0.005 | 22      |
| Igala           | 0.001      | 0.037  | 0.021    | 0.007         | 0.015        | 0.002          | 0.002  | 0.072        | 0.005          | 0.788             | 0.011   | 0.026 | 0.003   | 0.008 | 17      |
| Igbo            | 0.002      | 0.023  | 0.019    | 0.007         | 0.013        | 0.003          | 0.004  | 0.100        | 0.006          | 0.760             | 0.011   | 0.039 | 0.002   | 0.010 | 28      |
| Gwari           | 0.002      | 0.056  | 0.028    | 0.007         | 0.017        | 0.004          | 0.011  | 0.069        | 0.004          | 0.725             | 0.007   | 0.061 | 0.002   | 0.006 | 22      |
| Bassange        | 0.001      | 0.064  | 0.015    | 0.006         | 0.011        | 0.006          | 0.005  | 0.107        | 0.004          | 0.742             | 0.006   | 0.025 | 0.003   | 0.004 | 20      |
| Koma            | 0.002      | 0.037  | 0.018    | 0.005         | 0.082        | 0.025          | 0.029  | 0.013        | 0.051          | 0.511             | 0.013   | 0.207 | 0.003   | 0.003 | 12      |
| Mada            | 0.001      | 0.591  | 0.023    | 0.007         | 0.018        | 0.002          | 0.004  | 0.012        | 0.004          | 0.309             | 0.006   | 0.014 | 0.002   | 0.007 | 28      |
| Ouldeme         | 0.001      | 0.580  | 0.023    | 0.007         | 0.013        | 0.004          | 0.005  | 0.021        | 0.005          | 0.311             | 0.006   | 0.012 | 0.002   | 0.009 | 26      |
| Giziga          | 0.003      | 0.442  | 0.033    | 0.008         | 0.025        | 0.003          | 0.007  | 0.019        | 0.007          | 0.390             | 0.007   | 0.049 | 0.002   | 0.004 | 24      |
| Mandara         | 0.001      | 0.446  | 0.045    | 0.009         | 0.047        | 0.005          | 0.023  | 0.026        | 0.006          | 0.347             | 0.008   | 0.029 | 0.002   | 0.006 | 26      |
| Kotoko          | 0.001      | 0.464  | 0.066    | 0.007         | 0.043        | 0.016          | 0.012  | 0.032        | 0.005          | 0.291             | 0.005   | 0.042 | 0.003   | 0.012 | 17      |
| Zulgo           | 0.002      | 0.559  | 0.024    | 0.006         | 0.019        | 0.002          | 0.004  | 0.008        | 0.003          | 0.344             | 0.004   | 0.012 | 0.002   | 0.011 | 22      |
| Podokwo         | 0.002      | 0.576  | 0.023    | 0.008         | 0.017        | 0.002          | 0.004  | 0.014        | 0.004          | 0.312             | 0.005   | 0.023 | 0.003   | 0.007 | 30      |
| Massa           | 0.001      | 0.405  | 0.042    | 0.008         | 0.090        | 0.001          | 0.006  | 0.014        | 0.004          | 0.368             | 0.008   | 0.044 | 0.004   | 0.004 | 15      |
| Hausa_Cameroon  | 0.001      | 0.182  | 0.043    | 0.012         | 0.016        | 0.006          | 0.027  | 0.030        | 0.007          | 0.593             | 0.006   | 0.065 | 0.003   | 0.011 | 27      |
| Baggara         | 0.002      | 0.302  | 0.187    | 0.011         | 0.091        | 0.029          | 0.092  | 0.020        | 0.004          | 0.227             | 0.007   | 0.018 | 0.002   | 0.008 | 23      |
| Fulani_Cameroon | 0.001      | 0.224  | 0.062    | 0.006         | 0.020        | 0.022          | 0.299  | 0.028        | 0.004          | 0.299             | 0.007   | 0.021 | 0.002   | 0.005 | 41      |
| Fulani_Mbororo  | 0.002      | 0.027  | 0.062    | 0.004         | 0.007        | 0.034          | 0.647  | 0.022        | 0.002          | 0.168             | 0.008   | 0.015 | 0.001   | 0.002 | 13      |
| Tupuri          | 0.002      | 0.382  | 0.036    | 0.009         | 0.046        | 0.003          | 0.004  | 0.031        | 0.005          | 0.420             | 0.007   | 0.048 | 0.002   | 0.005 | 22      |
| Baka            | 0.001      | 0.013  | 0.013    | 0.005         | 0.009        | 0.001          | 0.003  | 0.006        | 0.003          | 0.210             | 0.005   | 0.012 | 0.002   | 0.718 | 48      |
| Bakola          | 0.002      | 0.014  | 0.011    | 0.007         | 0.008        | 0.001          | 0.002  | 0.006        | 0.007          | 0.258             | 0.012   | 0.005 | 0.003   | 0.664 | 42      |
| Bedzan          | 0.001      | 0.011  | 0.014    | 0.008         | 0.010        | 0.002          | 0.004  | 0.021        | 0.005          | 0.427             | 0.006   | 0.009 | 0.003   | 0.479 | 17      |
| Mvae            | 0.002      | 0.021  | 0.032    | 0.010         | 0.022        | 0.003          | 0.003  | 0.008        | 0.012          | 0.808             | 0.011   | 0.016 | 0.003   | 0.050 | 24      |
| Ngumba          | 0.002      | 0.019  | 0.031    | 0.019         | 0.018        | 0.002          | 0.006  | 0.009        | 0.008          | 0.772             | 0.014   | 0.018 | 0.004   | 0.079 | 27      |
| Zime            | 0.002      | 0.045  | 0.028    | 0.022         | 0.017        | 0.002          | 0.003  | 0.018        | 0.007          | 0.740             | 0.022   | 0.026 | 0.004   | 0.066 | 30      |
| Bamoun          | 0.002      | 0.035  | 0.027    | 0.015         | 0.019        | 0.002          | 0.011  | 0.020        | 0.007          | 0.811             | 0.012   | 0.024 | 0.001   | 0.015 | 31      |
| Banen           | 0.003      | 0.017  | 0.029    | 0.031         | 0.021        | 0.003          | 0.004  | 0.020        | 0.011          | 0.817             | 0.010   | 0.015 | 0.003   | 0.016 | 25      |
| Bafia           | 0.002      | 0.029  | 0.026    | 0.014         | 0.018        | 0.002          | 0.005  | 0.013        | 0.010          | 0.824             | 0.011   | 0.023 | 0.004   | 0.019 | 30      |
| Lemende         | 0.002      | 0.026  | 0.020    | 0.015         | 0.014        | 0.003          | 0.004  | 0.007        | 0.006          | 0.862             | 0.009   | 0.012 | 0.004   | 0.015 | 26      |
| Batanga         | 0.004      | 0.028  | 0.024    | 0.035         | 0.015        | 0.002          | 0.005  | 0.011        | 0.010          | 0.806             | 0.011   | 0.017 | 0.002   | 0.032 | 20      |
| Iyassa          | 0.004      | 0.024  | 0.032    | 0.033         | 0.015        | 0.012          | 0.003  | 0.023        | 0.009          | 0.792             | 0.011   | 0.011 | 0.003   | 0.029 | 37      |

Table S9. Proportion of AACs from the Africa Structure Run at K=14

| Population Name | S. African |        |          |               |                 |                |        |              |                  |                   |         | n     |         |       |         |
|-----------------|------------|--------|----------|---------------|-----------------|----------------|--------|--------------|------------------|-------------------|---------|-------|---------|-------|---------|
|                 | Mbugu      | Chadic | Cushitic | Eastern Bantu | Nilotic Saharan | Saharan /Dogon | Fulani | Non-Bantu NK | Khoesasan /Mbuti | Niger Kordofanian | Sandawe |       | Sudanic | Hadza | W/Pygmy |
| Fang            | 0.002      | 0.022  | 0.030    | 0.012         | 0.021           | 0.002          | 0.004  | 0.012        | 0.009            | 0.803             | 0.011   | 0.009 | 0.004   | 0.059 | 19      |
| Mabea           | 0.001      | 0.023  | 0.021    | 0.010         | 0.018           | 0.003          | 0.003  | 0.011        | 0.012            | 0.800             | 0.010   | 0.013 | 0.002   | 0.072 | 13      |
| Yambassa        | 0.001      | 0.034  | 0.025    | 0.013         | 0.023           | 0.003          | 0.005  | 0.010        | 0.012            | 0.826             | 0.016   | 0.017 | 0.002   | 0.013 | 17      |
| Tikar_South     | 0.005      | 0.036  | 0.024    | 0.020         | 0.015           | 0.002          | 0.007  | 0.018        | 0.013            | 0.785             | 0.010   | 0.035 | 0.003   | 0.026 | 21      |
| Tikar_North     | 0.003      | 0.038  | 0.030    | 0.014         | 0.018           | 0.002          | 0.006  | 0.030        | 0.012            | 0.771             | 0.014   | 0.043 | 0.002   | 0.018 | 13      |
| Ntumu           | 0.002      | 0.030  | 0.023    | 0.019         | 0.013           | 0.004          | 0.003  | 0.005        | 0.007            | 0.848             | 0.010   | 0.007 | 0.006   | 0.024 | 11      |
| Bulu            | 0.002      | 0.033  | 0.025    | 0.018         | 0.018           | 0.002          | 0.004  | 0.014        | 0.010            | 0.801             | 0.012   | 0.021 | 0.003   | 0.036 | 22      |
| Eton            | 0.005      | 0.033  | 0.019    | 0.008         | 0.029           | 0.003          | 0.015  | 0.025        | 0.003            | 0.787             | 0.008   | 0.026 | 0.005   | 0.034 | 4       |
| Wimbum          | 0.002      | 0.023  | 0.038    | 0.015         | 0.020           | 0.002          | 0.003  | 0.019        | 0.008            | 0.812             | 0.018   | 0.026 | 0.003   | 0.011 | 15      |
| Batie           | 0.001      | 0.029  | 0.019    | 0.028         | 0.019           | 0.002          | 0.004  | 0.034        | 0.012            | 0.803             | 0.010   | 0.027 | 0.001   | 0.011 | 16      |
| Ewondo          | 0.001      | 0.045  | 0.017    | 0.015         | 0.013           | 0.001          | 0.002  | 0.006        | 0.004            | 0.827             | 0.010   | 0.014 | 0.001   | 0.043 | 3       |
| Kanuri          | 0.004      | 0.342  | 0.056    | 0.014         | 0.058           | 0.004          | 0.024  | 0.034        | 0.006            | 0.390             | 0.010   | 0.047 | 0.003   | 0.007 | 31      |
| Biaka           | 0.001      | 0.019  | 0.014    | 0.010         | 0.009           | 0.002          | 0.002  | 0.024        | 0.015            | 0.167             | 0.007   | 0.022 | 0.001   | 0.706 | 23      |
| Mbum            | 0.002      | 0.092  | 0.015    | 0.005         | 0.020           | 0.002          | 0.005  | 0.019        | 0.005            | 0.589             | 0.006   | 0.234 | 0.002   | 0.004 | 13      |
| Yakoma          | 0.003      | 0.133  | 0.019    | 0.016         | 0.031           | 0.003          | 0.004  | 0.036        | 0.011            | 0.584             | 0.015   | 0.093 | 0.003   | 0.048 | 6       |
| Gbaya           | 0.001      | 0.090  | 0.029    | 0.010         | 0.033           | 0.001          | 0.004  | 0.016        | 0.006            | 0.643             | 0.003   | 0.151 | 0.002   | 0.012 | 15      |
| Laka            | 0.001      | 0.102  | 0.022    | 0.007         | 0.015           | 0.002          | 0.006  | 0.035        | 0.006            | 0.533             | 0.005   | 0.254 | 0.002   | 0.008 | 33      |
| Ngambaye        | 0.002      | 0.170  | 0.022    | 0.009         | 0.025           | 0.003          | 0.006  | 0.021        | 0.004            | 0.514             | 0.005   | 0.213 | 0.002   | 0.006 | 30      |
| Kaba            | 0.001      | 0.098  | 0.026    | 0.011         | 0.015           | 0.003          | 0.004  | 0.025        | 0.004            | 0.541             | 0.006   | 0.259 | 0.002   | 0.006 | 27      |
| Bulala          | 0.001      | 0.438  | 0.099    | 0.005         | 0.155           | 0.008          | 0.015  | 0.029        | 0.005            | 0.185             | 0.008   | 0.044 | 0.002   | 0.006 | 15      |
| Kanembou        | 0.002      | 0.345  | 0.179    | 0.008         | 0.081           | 0.016          | 0.025  | 0.018        | 0.008            | 0.256             | 0.006   | 0.049 | 0.002   | 0.006 | 5       |
| Sara_various    | 0.001      | 0.158  | 0.035    | 0.008         | 0.036           | 0.003          | 0.006  | 0.024        | 0.004            | 0.548             | 0.007   | 0.162 | 0.002   | 0.007 | 27      |
| Baluba          | 0.001      | 0.018  | 0.011    | 0.024         | 0.022           | 0.002          | 0.002  | 0.055        | 0.009            | 0.772             | 0.020   | 0.040 | 0.002   | 0.024 | 6       |
| Kongo           | 0.003      | 0.029  | 0.023    | 0.059         | 0.013           | 0.003          | 0.003  | 0.018        | 0.007            | 0.795             | 0.015   | 0.015 | 0.002   | 0.017 | 17      |
| Barega          | 0.001      | 0.040  | 0.022    | 0.031         | 0.023           | 0.001          | 0.003  | 0.058        | 0.048            | 0.686             | 0.055   | 0.015 | 0.003   | 0.014 | 4       |
| Mbuti           | 0.001      | 0.010  | 0.020    | 0.004         | 0.033           | 0.001          | 0.002  | 0.026        | 0.606            | 0.055             | 0.010   | 0.012 | 0.004   | 0.216 | 13      |
| Tutsi/Hutu      | 0.002      | 0.014  | 0.186    | 0.144         | 0.039           | 0.003          | 0.002  | 0.022        | 0.011            | 0.526             | 0.012   | 0.019 | 0.002   | 0.017 | 8       |
| Dinka           | 0.002      | 0.253  | 0.054    | 0.007         | 0.552           | 0.001          | 0.003  | 0.015        | 0.004            | 0.062             | 0.007   | 0.031 | 0.003   | 0.006 | 17      |
| Nuer            | 0.003      | 0.234  | 0.078    | 0.008         | 0.547           | 0.002          | 0.004  | 0.015        | 0.006            | 0.068             | 0.007   | 0.018 | 0.002   | 0.008 | 18      |
| Shilluk         | 0.006      | 0.224  | 0.062    | 0.007         | 0.518           | 0.003          | 0.004  | 0.007        | 0.005            | 0.109             | 0.006   | 0.039 | 0.005   | 0.005 | 15      |
| Nyimang         | 0.003      | 0.255  | 0.154    | 0.010         | 0.393           | 0.011          | 0.011  | 0.011        | 0.022            | 0.086             | 0.008   | 0.028 | 0.001   | 0.006 | 12      |
| Hadza           | 0.002      | 0.013  | 0.071    | 0.054         | 0.012           | 0.003          | 0.003  | 0.007        | 0.005            | 0.149             | 0.011   | 0.009 | 0.657   | 0.005 | 63      |
| Sandawe         | 0.001      | 0.014  | 0.223    | 0.017         | 0.012           | 0.006          | 0.004  | 0.008        | 0.006            | 0.090             | 0.600   | 0.011 | 0.004   | 0.005 | 51      |
| Iraqw           | 0.002      | 0.016  | 0.767    | 0.038         | 0.012           | 0.002          | 0.004  | 0.011        | 0.006            | 0.065             | 0.042   | 0.014 | 0.008   | 0.012 | 46      |
| Burunge         | 0.002      | 0.014  | 0.394    | 0.192         | 0.015           | 0.004          | 0.003  | 0.013        | 0.012            | 0.153             | 0.152   | 0.017 | 0.011   | 0.018 | 22      |
| Fiome           | 0.003      | 0.026  | 0.669    | 0.083         | 0.022           | 0.005          | 0.007  | 0.011        | 0.009            | 0.082             | 0.045   | 0.020 | 0.011   | 0.008 | 22      |
| Mbugu           | 0.320      | 0.021  | 0.392    | 0.042         | 0.021           | 0.003          | 0.003  | 0.007        | 0.004            | 0.160             | 0.009   | 0.010 | 0.002   | 0.004 | 22      |
| Maasai          | 0.002      | 0.049  | 0.468    | 0.065         | 0.159           | 0.008          | 0.004  | 0.009        | 0.011            | 0.175             | 0.025   | 0.011 | 0.007   | 0.009 | 36      |
| Akie            | 0.006      | 0.022  | 0.602    | 0.021         | 0.049           | 0.007          | 0.005  | 0.009        | 0.011            | 0.139             | 0.106   | 0.008 | 0.005   | 0.008 | 23      |
| Datog           | 0.002      | 0.044  | 0.632    | 0.042         | 0.086           | 0.004          | 0.007  | 0.014        | 0.009            | 0.105             | 0.020   | 0.022 | 0.006   | 0.008 | 54      |
| Turu            | 0.002      | 0.023  | 0.329    | 0.150         | 0.017           | 0.005          | 0.007  | 0.013        | 0.015            | 0.274             | 0.134   | 0.011 | 0.008   | 0.012 | 32      |
| Sukuma          | 0.002      | 0.015  | 0.111    | 0.255         | 0.021           | 0.003          | 0.004  | 0.005        | 0.015            | 0.515             | 0.014   | 0.022 | 0.012   | 0.006 | 10      |

Table S9. Proportion of AACs from the Africa Structure Run at K=14

| Population Name     | S. African |        |          |               |              |                |        |              |                |                   | n     |         |         |       |         |
|---------------------|------------|--------|----------|---------------|--------------|----------------|--------|--------------|----------------|-------------------|-------|---------|---------|-------|---------|
|                     | Mbugu      | Chadic | Cushitic | Eastern Bantu | Nilo Saharan | Saharan /Dogon | Fulani | Non-Bantu NK | Khoesan /Mbuti | Niger Kordofanian |       | Sandawe | Sudanic | Hadza | W/Pygmy |
| Gogo                | 0.001      | 0.016  | 0.221    | 0.192         | 0.017        | 0.002          | 0.004  | 0.017        | 0.019          | 0.374             | 0.108 | 0.013   | 0.007   | 0.007 | 13      |
| Mbugwe              | 0.004      | 0.017  | 0.253    | 0.265         | 0.016        | 0.003          | 0.004  | 0.012        | 0.012          | 0.349             | 0.031 | 0.019   | 0.005   | 0.011 | 21      |
| Rangi               | 0.002      | 0.022  | 0.299    | 0.251         | 0.013        | 0.006          | 0.004  | 0.014        | 0.013          | 0.289             | 0.059 | 0.013   | 0.005   | 0.010 | 36      |
| Sambaa              | 0.021      | 0.014  | 0.200    | 0.230         | 0.016        | 0.005          | 0.004  | 0.007        | 0.009          | 0.452             | 0.017 | 0.016   | 0.002   | 0.007 | 18      |
| Pare                | 0.025      | 0.015  | 0.160    | 0.203         | 0.014        | 0.003          | 0.004  | 0.007        | 0.010          | 0.516             | 0.020 | 0.014   | 0.003   | 0.007 | 23      |
| Gabra               | 0.002      | 0.042  | 0.765    | 0.006         | 0.056        | 0.037          | 0.007  | 0.007        | 0.010          | 0.038             | 0.009 | 0.014   | 0.002   | 0.005 | 17      |
| Borana              | 0.004      | 0.041  | 0.734    | 0.016         | 0.054        | 0.024          | 0.006  | 0.012        | 0.008          | 0.058             | 0.017 | 0.016   | 0.003   | 0.007 | 32      |
| Wata                | 0.003      | 0.060  | 0.732    | 0.008         | 0.065        | 0.007          | 0.010  | 0.015        | 0.006          | 0.059             | 0.012 | 0.015   | 0.003   | 0.007 | 6       |
| Rendille            | 0.001      | 0.043  | 0.758    | 0.005         | 0.072        | 0.033          | 0.005  | 0.010        | 0.004          | 0.046             | 0.004 | 0.013   | 0.002   | 0.004 | 28      |
| EI_Molo             | 0.001      | 0.047  | 0.532    | 0.011         | 0.249        | 0.006          | 0.004  | 0.014        | 0.007          | 0.089             | 0.019 | 0.012   | 0.002   | 0.007 | 16      |
| Yaaku               | 0.001      | 0.025  | 0.624    | 0.036         | 0.180        | 0.004          | 0.005  | 0.009        | 0.006          | 0.084             | 0.012 | 0.008   | 0.002   | 0.005 | 19      |
| Maasai_Mumonyot     | 0.001      | 0.037  | 0.498    | 0.029         | 0.224        | 0.012          | 0.008  | 0.017        | 0.010          | 0.113             | 0.028 | 0.009   | 0.007   | 0.007 | 12      |
| Maasai_Il'gvesi     | 0.003      | 0.037  | 0.505    | 0.063         | 0.201        | 0.006          | 0.007  | 0.012        | 0.004          | 0.122             | 0.013 | 0.014   | 0.005   | 0.007 | 21      |
| Dorobo              | 0.002      | 0.044  | 0.490    | 0.062         | 0.187        | 0.004          | 0.006  | 0.008        | 0.010          | 0.116             | 0.038 | 0.015   | 0.007   | 0.011 | 10      |
| Tugen               | 0.002      | 0.037  | 0.324    | 0.011         | 0.500        | 0.005          | 0.008  | 0.012        | 0.004          | 0.060             | 0.007 | 0.018   | 0.005   | 0.007 | 22      |
| Samburu             | 0.001      | 0.049  | 0.580    | 0.025         | 0.203        | 0.012          | 0.002  | 0.012        | 0.009          | 0.069             | 0.012 | 0.015   | 0.003   | 0.007 | 18      |
| Marakwet            | 0.003      | 0.015  | 0.314    | 0.014         | 0.563        | 0.002          | 0.003  | 0.006        | 0.005          | 0.043             | 0.011 | 0.006   | 0.007   | 0.007 | 14      |
| Sengwer             | 0.001      | 0.030  | 0.325    | 0.012         | 0.530        | 0.004          | 0.004  | 0.007        | 0.005          | 0.052             | 0.010 | 0.010   | 0.004   | 0.007 | 21      |
| Okiek               | 0.002      | 0.017  | 0.502    | 0.017         | 0.293        | 0.003          | 0.009  | 0.008        | 0.007          | 0.097             | 0.026 | 0.008   | 0.005   | 0.006 | 22      |
| Nandi               | 0.001      | 0.027  | 0.311    | 0.058         | 0.353        | 0.005          | 0.006  | 0.010        | 0.005          | 0.185             | 0.009 | 0.018   | 0.002   | 0.009 | 11      |
| Sabaot              | 0.001      | 0.032  | 0.203    | 0.067         | 0.391        | 0.003          | 0.004  | 0.017        | 0.008          | 0.215             | 0.018 | 0.025   | 0.008   | 0.008 | 20      |
| Turkana             | 0.002      | 0.107  | 0.248    | 0.050         | 0.364        | 0.004          | 0.004  | 0.022        | 0.012          | 0.125             | 0.013 | 0.033   | 0.005   | 0.010 | 26      |
| Pokot               | 0.001      | 0.039  | 0.306    | 0.013         | 0.543        | 0.003          | 0.003  | 0.007        | 0.008          | 0.050             | 0.009 | 0.008   | 0.003   | 0.007 | 23      |
| Maasai Ilchamus     | 0.002      | 0.031  | 0.459    | 0.032         | 0.307        | 0.013          | 0.006  | 0.016        | 0.006          | 0.090             | 0.012 | 0.016   | 0.004   | 0.007 | 27      |
| Luo                 | 0.002      | 0.045  | 0.044    | 0.236         | 0.094        | 0.002          | 0.005  | 0.013        | 0.013          | 0.501             | 0.011 | 0.020   | 0.004   | 0.010 | 28      |
| Bantu_Kenya         | 0.002      | 0.024  | 0.069    | 0.222         | 0.093        | 0.006          | 0.004  | 0.043        | 0.022          | 0.476             | 0.013 | 0.013   | 0.002   | 0.012 | 11      |
| Kikuyu              | 0.007      | 0.034  | 0.315    | 0.163         | 0.073        | 0.004          | 0.009  | 0.020        | 0.013          | 0.306             | 0.021 | 0.023   | 0.002   | 0.010 | 22      |
| Luhya               | 0.002      | 0.026  | 0.048    | 0.272         | 0.097        | 0.003          | 0.006  | 0.008        | 0.010          | 0.484             | 0.018 | 0.017   | 0.003   | 0.008 | 17      |
| Burji               | 0.001      | 0.025  | 0.710    | 0.030         | 0.034        | 0.016          | 0.010  | 0.019        | 0.017          | 0.068             | 0.021 | 0.024   | 0.005   | 0.021 | 24      |
| Konso               | 0.005      | 0.036  | 0.731    | 0.012         | 0.033        | 0.015          | 0.002  | 0.015        | 0.017          | 0.041             | 0.031 | 0.024   | 0.007   | 0.031 | 14      |
| Beta_Israel         | 0.003      | 0.022  | 0.681    | 0.006         | 0.027        | 0.170          | 0.006  | 0.009        | 0.014          | 0.030             | 0.009 | 0.011   | 0.002   | 0.009 | 17      |
| Cape Mixed Ancestry | 0.002      | 0.008  | 0.253    | 0.017         | 0.006        | 0.264          | 0.007  | 0.018        | 0.262          | 0.128             | 0.009 | 0.011   | 0.003   | 0.011 | 39      |
| San                 | 0.001      | 0.005  | 0.030    | 0.003         | 0.003        | 0.002          | 0.001  | 0.003        | 0.873          | 0.015             | 0.005 | 0.003   | 0.006   | 0.050 | 6       |
| !Xun/Khoe           | 0.004      | 0.007  | 0.017    | 0.003         | 0.011        | 0.002          | 0.002  | 0.011        | 0.777          | 0.089             | 0.010 | 0.013   | 0.004   | 0.049 | 8       |
| Xhosa               | 0.004      | 0.012  | 0.028    | 0.035         | 0.010        | 0.013          | 0.004  | 0.005        | 0.412          | 0.454             | 0.010 | 0.007   | 0.002   | 0.006 | 28      |
| Venda               | 0.014      | 0.017  | 0.015    | 0.036         | 0.006        | 0.014          | 0.004  | 0.005        | 0.192          | 0.670             | 0.005 | 0.009   | 0.001   | 0.011 | 13      |
| Bantu_South         | 0.001      | 0.016  | 0.021    | 0.070         | 0.011        | 0.002          | 0.003  | 0.024        | 0.208          | 0.621             | 0.007 | 0.007   | 0.002   | 0.007 | 8       |
| Max                 | 0.320      | 0.591  | 0.767    | 0.272         | 0.563        | 0.551          | 0.647  | 0.373        | 0.873          | 0.862             | 0.600 | 0.259   | 0.657   | 0.718 |         |

## References

- S1. S. A. Miller, D. D. Dykes, H. F. Polesky, *Nucleic Acids Res* 16, 1215 (Feb 11, 1988).
- S2. <http://www.tau.ac.il/medicine/NLGIP/catalog.htm>.
- S3. [http://research.marshfieldclinic.org/genetics/GenotypingData\\_Statistics/humanDiversityPanel.asp](http://research.marshfieldclinic.org/genetics/GenotypingData_Statistics/humanDiversityPanel.asp).
- S4. N. A. Rosenberg *et al.*, *Science* 298, 2381 (Dec 20, 2002).
- S5. N. A. Rosenberg *et al.*, *PLoS Genet* 1, e70 (Dec, 2005).
- S6. N. A. Rosenberg *et al.*, *PLoS Genet* 2, e215 (Dec, 2006).
- S7. M. P. Epstein, W. L. Duren, M. Boehnke, *Am J Hum Genet* 67, 1219 (Nov, 2000).
- S8. N. A. Rosenberg, *Ann Hum Genet* 70, 841 (Nov, 2006).
- S9. N. Patterson, A. L. Price, D. Reich, *PLoS Genet* 2, e190 (Dec, 2006).
- S10. <http://www.graphviz.org>.
- S11. J. Reynolds, B. S. Weir, C. C. Cockerham, *Genetics* 105, 767 (Nov, 1983).
- S12. N. Takezaki, M. Nei, *Genetics* 178, 385 (Jan, 2008).
- S13. F. Balloux, N. Lugon-Moulin, *Mol Ecol* 11, 155 (Feb, 2002).
- S14. <http://www.evolution.genetics.washington.edu/phylip.html>.
- S15. M. Slatkin, *Genetics*, 457 (1995).
- S16. D. B. Goldstein, A. Ruiz Linares, L. L. Cavalli-Sforza, M. W. Feldman, *Proc Natl Acad Sci U S A* 92, 6723 (Jul 18, 1995).
- S17. D. Paetkau, L. P. Waits, P. L. Clarkson, L. Craighead, C. Strobeck, *Genetics* 147, 1943 (Dec, 1997).
- S18. R. D. Page, *Comput Appl Biosci* 12, 357 (Aug, 1996).
- S19. M. K. Gonder, H. M. Mortensen, F. A. Reed, A. de Sousa, S. A. Tishkoff, *Mol Biol Evol* 24, 757 (Mar, 2007).
- S20. J. Z. Li *et al.*, *Science* 319, 1100 (Feb 22, 2008).
- S21. Y. S. Chen *et al.*, *Am J Hum Genet* 66, 1362 (Apr, 2000).
- S22. S. A. Tishkoff *et al.*, *Mol Biol Evol* 24, 2180 (Oct, 2007).
- S23. A. M. Valdes, M. Slatkin, N. B. Freimer, *Genetics* 133, 737 (1993).
- S24. P. O. Lewis, D. V. Zaykin. (2001).
- S25. M. Nei, *Molecular Evolutionary Genetics*. (Columbia University Press, New York, 1987).
- S26. M. Kimura, T. Ohta, *Genetics* 75, 199 (1973).
- S27. Z. A. Szpiech, M. Jakobsson, N. A. Rosenberg, *Bioinformatics* 24, 2498 (Nov 1, 2008).
- S28. B. S. Weir, *Genetic data analysis II: Methods for discrete population genetic data.*, (Sinauer Associates, Sunderland, MA, ed. 2nd 1996).
- S29. <http://www.ethnologue.com>.
- S30. H. M. Cann *et al.*, *Science* 296, 261 (Apr 12, 2002).
- S31. S. Ramachandran *et al.*, *Proc Natl Acad Sci U S A* 102, 15942 (Nov 1, 2005).
- S32. O. Francois, S. Ancelet, G. Guillot, *Genetics* 174, 805 (Oct, 2006).
- S33. <http://genepath.med.harvard.edu/~reich/Software.htm>.
- S34. <http://pritch.bsd.uchicago.edu/structure.html>.
- S35. J. K. Pritchard, M. Stephens, P. Donnelly, *Genetics* 155, 945 (Jun, 2000).
- S36. J. S. Friedlaender *et al.*, *PLoS Genet* 4, e19 (Jan, 2008).
- S37. D. Falush, M. Stephens, J. K. Pritchard, *Genetics* 164, 1567 (Aug, 2003).

- S38. M. Jakobsson, N. A. Rosenberg, *Bioinformatics* 23, 1801 (Jul 15, 2007).
- S39. <http://rosenberglab.bioinformatics.med.umich.edu/distruct.html>.
- S40. S. S. Shapiro, M. B. Wilk, *Biometrika* 52, 591 (1965).
- S41. R. R. Sokal, F. J. Rohlf, *Introduction to Biostatistics*. (Freeman and Company, San Francisco, ed. 2nd, 1987), pp. xii, 363
- S42. SAS. (SAS Institute Inc, Cary, NC, 2004).
- S43. C. Ehret, *A Comparative Historical Reconstruction of Proto-Nilo-Saharan*. Sprache und Geschichte in Afrika. SUGIA-Supplements (Rüdiger Köppe Verlag, Cologne, 2001), vol. 12, pp. 633.
- S44. C. Ehret, *Reconstructing Proto-Afroasiatic (Proto-Afrasian) : vowels, tone, consonants, and vocabulary*. University of California publications in linguistics v. 126 (University of California Press, Berkeley, 1995), pp. xvii, 557.
- S45. P. Newman, *Journal of African Languages*. 5, 5 (1977).
- S46. M. L. Bender, *Anthropological Linguistics* 13, 165 (1971).
- S47. C. Ehret, *Sprache und Geschichte in Afrika* 8, 7 (1987).
- S48. C. Ehret, in *In Hot Pursuit of Language in Prehistory*, J. Bengtson, Ed. (John Benjamins, Amsterdam, 2008), pp. 140-160.
- S49. C. Ehret, *Studies in African Linguistics* 22, 211 (1991).
- S50. C. Ehret, *The historical reconstruction of Southern Cushitic phonology and vocabulary*. Kölner Beiträge zur Afrikanistik 5. Bd. (Reimer, Berlin, 1980), pp. 407.
- S51. K. Williamson, R. Blench, in *African Languages: an introduction*, B. Heine, D. Nurse, Eds. (Cambridge University Press, Cambridge, 2000), pp. 11-42.
- S52. <http://www.history.ucla.edu/ehret/>.
- S53. Y. Bastin, A. Coupez, M. Mann, *Continuity and divergence in the Bantu languages : perspectives from a lexicostatistic study*. *Annales. Menswetenschappen = Annales. Sciences humaines* (Musée royal de l'Afrique centrale, Tervuren, Belgium, 1999), pp. vi, 225.
- S54. W. A. A. Wilson, in *The Niger-Congo Languages*, J. Bendor-Samuel, Ed. (University Press of America, Lanham, MD, 1989), pp. 81-104.
- S55. T. Naden, in *The Niger-Congo Languages* J. Bendor-Samuel, Ed. (University Press of America, Lanham, MD, 1989), pp. 140-168.
- S56. K. A. Klieman, *"The Pygmies were our compass" : Bantu and Batwa in the history of west central Africa, early times to c. 1900 C.E.* *Social history of Africa* (Heinemann, Portsmouth, NH, 2003), pp. xxxiv, 253.
- S57. D. E. Saxon, in *The Archaeological and Linguistic Reconstruction of African History*, C. Ehret, M. Posnansky, Eds. (University of California, Berkeley, 1982), pp. 39-56.
- S58. R. G. Armstrong, *The Study of West African Languages* (Ibadan University Press, Ibadan, 1964), pp. 74.
- S59. T. L. E. Wilson, Ph.D. diss, University of California at Los Angeles (1980).
- S60. R. Vossen, *The Eastern Nilotic Languages* (Dietrich Reimer Verlag, Berlin, 1982), pp. 512.
- S61. R. Thelwall, in *The Archaeological and Linguistic Reconstruction of African History*, C. Ehret, M. Posnansky, Eds. (University of California, Berkeley, 1982), pp. 39-56.



- S62. C. Ehret, in *Culture History in the Southern Sudan*, J. Mack, P. Robertshaw, Eds. (British Institute in Eastern Africa, Nairobi, 1983), pp. 19-48.
- S63. B. Heine, *The Kuliak Languages*. (EAPH, Nairobi, 1976), pp. x, 79.
- S64. J. Distefano, Ph.D. diss., University of California (1985).
- S65. D. E. Saxon, Ph.D. diss., University of California (1980).
- S66. R. Thelwall, Ph.D. diss., New University of Ulster (1981).
- S67. C. Ehret, in *Archaeology of Early Northeastern Africa*, M. Chlodnicki, K. Kroeper, Eds. (Poznan Archaeological Museum, Studies in African Archaeology, Poznan, Poland, 2006), vol. 9, pp. 1019-1055.
- S68. A. Militarev, in *Time Depth in Historical Linguistics*, C. Renfrew, A. McMahon, L. Trask, Eds. (McDonald Institute for Archaeological Research, Cambridge, 2000), vol. 1, pp. 267-307.
- S69. C. Ehret, *Ufahamu* 26, 54 (1997).
- S70. C. Ehret, in *The Archeological and Linguistic Reconstruction of African History*, C. Ehret, M. Posnansky, Eds. (University of California Press, Berkeley, 1982), pp. 158-181.
- S71. S. M. Embleton, Ed., *Statistics in Historical Linguistics*, (Studienverlag Brockmeyer, Bochum, Germany, 1986), pp. viii, 194.
- S72. E. T. Wood *et al.*, *Eur J Hum Genet* 13, 867 (2005).
- S73. J. H. Greenberg, *Studies in African Linguistic Classification* (Compass Press Bradford, CT, 1955).
- S74. C. Ehret, *The civilizations of Africa : a history to 1800*. (University Press of Virginia, Charlottesville, 2002), pp. xii, 480.
- S75. C. Ehret, S. O. Keita, P. Newman, *Science* 306, 1680; author reply 1680 (Dec 3, 2004).
- S76. L. Lim, Ph.D. diss., Brown University (1992).
- S77. T. Güldemann, M. Stoneking, *Annu Rev. Anthropol.* 37, 93 (2008).
- S78. B. Sands, in *Language, identity and conceptualization among the Khoisan*, M. Schladt, Ed. (Rudiger Kupper Verlag, Koln, 1998), vol. Bd 15, pp. 266 - 283.
- S79. E. D. Elderkin, *Sprache und Geschichte in Afrika* 4, 67 (1982).
- S80. M. Kimmel *et al.*, *Genetics* 148, 1921 (Apr, 1998).
- S81. J. P. King, M. Kimmel, R. Chakraborty, *Mol Biol Evol* 17, 1859 (Dec, 2000).
- S82. M. C. Campbell, S. A. Tishkoff, *Annu Rev Genomics Hum Genet* 9, 403 (2008).
- S83. C. Ehret, *An African Classical Age : Eastern and Southern Africa in World History, 1000 B.C. to A.D. 400*. (University Press of Virginia, Charlottesville, 1998), pp. xvii, 354.
- S84. S. H. Ambrose, *Archaeology and linguistic reconstructions of history in Eastern Africa*. C. Ehret, M. Posnansy, Eds., *The Archeological and Linguistic Reconstruction of African History* (University of California Press, Berkeley, 1982), pp. xii, 299.
- S85. R. Scozzari *et al.*, *Am J Hum Genet* 65, 829 (Sep, 1999).
- S86. O. Semino, A. S. Santachiara-Benerecetti, F. Falaschi, L. L. Cavalli-Sforza, P. A. Underhill, *Am J Hum Genet* 70, 265 (Jan, 2002).
- S87. L. L. Cavalli-Sforza, A. Piazza, P. Menozzi, *History and Geography of Human Genes*. (Princeton University Press, Princeton, 1994).
- S88. P. Forster, S. Matsumura, *Science* 308, 965 (May 13, 2005).

- S89. M. Jakobsson *et al.*, *Nature* 451, 998 (Feb 21, 2008).
- S90. C. Ehret, *The International Journal of African Historical Studies* 34, 5 (2001).
- S91. J. L. Newman, *The Peopling of Africa*. (Yale University Press, New Haven and London, 1997), pp. xiv, 235.
- S92. M. Mous, in *Mixed languages: 15 case studies in language intertwining*, P. Bakker, M. Mous, Eds. (IFOTT, Amsterdam, 1994), pp. 175-201.
- S93. C. Ehret, *Southern African Humanities* 30, 7 (2008).
- S94. C. Ehret, in *African Historical Demography*, C. Fyfe, D. McMaster, Eds. (University of Edinburgh Centre of African Studies, Edinburgh, 1981), vol. 2, pp. 802.
- S95. C. Ehret, in *Early Human Kinship: From Sex to Social Reproduction*, N. J. Allen, H. Callan, R. Dunbar, W. James, Eds. (Blackwell, Oxford, UK, 2008), pp. 200-231, 259-269.
- S96. V. Cerny, A. Salas, M. Hajek, M. Zaloudkova, R. Brdicka, *Ann Hum Genet* 71, 433 (Jul, 2007).
- S97. H. Y. Hassan, P. A. Underhill, L. L. Cavalli-Sforza, M. E. Ibrahim, *Am J Phys Anthropol* 137, 316 (Nov, 2008).
- S98. R. E. Bereir *et al.*, *Eur J Hum Genet* 15, 1183 (Nov, 2007).
- S99. C. Ehret, in *West African Linguistics: Studies in Honor of Russell G. Schuh*, P. Newman, L. Hyman, Eds. (Ohio State University, Columbus, 2006), pp. 56-66.
- S100. V. Cerny *et al.*, *BMC Evol Biol* 9, 63 (Mar 23, 2009).
- S101. V. Cerny *et al.*, *Hum Biol* 78, 9 (Feb, 2006).
- S102. C. A. Mulcare *et al.*, *Am J Hum Genet* 74, 1102 (Jun, 2004).
- S103. C. Bailey, *Journal of the Economic and Social History of the Orient* 28, 20 (1985).
- S104. Y. Lev, *International Journal of Middle East Studies* 19, 337 (1987).
- S105. A. Levanoni, *Studia Islamica* 72, 121 (1990).
- S106. B. J. Walker, *Near Eastern Archaeology* 62, 202 (1999).
- S107. A. F. C. Holl, T. E. Levy, *The Biblical Archaeologist* 56, 166 (1993).
- S108. T. E. Levy, A. F. C. Holl, *Journal of Anthropological Archaeology* 21, 83 (2002).
- S109. B. Lembezat, Ed., *Les populations païennes du Nord- Cameroun et de l'Adamaoua*, (Press Universitaires de France, Paris, 1961).
- S110. C. Ehret, *Ethiopians and East Africans : the problem of contacts*. Nairobi Historical Studies (East African Publishing House, Nairobi, 1974), pp. 95.
- S111. S. H. Ambrose, *Sprache und Geschichte in Afrika* 7.2, 11 (1986).
- S112. S. Feierman, *The Shambaa Kingdom*. (University of Wisconsin Press, Madison, 1974).
- S113. S. G. Thomason, *Contact Languages: A wider perspective*. S. G. Thomason, Ed., (John Benjamins Publishing Company, Amsterdam/Philadelphia, 1997), pp. xiii, 506.
- S114. R. Blackburn, *In the land of milk and honey: Okiek adaptations to their forests and neighbors*. S. Kent, Ed., Cultural diversity among twentieth-century foragers: an African perspective (Cambridge University Press, Cambridge, 1996), pp. xiv, 344.
- S115. L. Cronk, *Ethnology* 41, 27 (2002).
- S116. S. A. Tishkoff *et al.*, *Nat Genet* 39, 31 (Jan, 2007).

- S117. L. Cronk, *From Mukogodo to Maasai: Ethnicity and Cultural Change in Kenya*. (Westview Press, Boulder CO, 2004).
- S118. C. Ehret, in *in Semino-Hamitic Festschrift for, A. B. Dolgopolsky, G. Jungraithmayr, G. Takacs*, Eds. (Dietrich Reimer, Berlin, 2008), pp. xii, 378.
- S119. P. Lieberman, R. McCarthy, *Expedition* 49, 15 (2007).
- S120. C. Ehret, in *in Origins: The Story of the Emergence of Humans and Humanity in Africa* G. Blundell, Ed. (Double Storey, Cape Town, 2006), pp. 45,47.
- S121. S. Bahuchet, *La rencontre des agriculteurs : les Pygmées parmi les peuples d'Afrique centrale*. Histoire d'une civilisation forestière (Peeters, Paris, 1993), pp. 173
- S122. S. Bahuchet, *Pygmées de Centrafrique : études ethnologiques, historiques et linguistiques sur les Pygmées "Ba. Mbenga" (aka/baka) du nord-ouest du bassin congolais*. Etudes pygmées 3 (SELAF, Paris, 1979), pp. 179
- S123. H. Terashima, *African Study Monographs* 28, 7 (2003).
- S124. L. L. Cavalli-Sforza, *Proc Natl Acad Sci U S A* 94, 7719 (Jul 22, 1997).
- S125. S. Wang *et al.*, *PLoS Genet* 3, e185 (Nov, 2007).
- S126. K. Hunley *et al.*, *PLoS Genet* 4, e1000239 (Oct, 2008).
- S127. E. M. Belle, G. Barbujani, *Am J Phys Anthropol* 133, 1137 (Aug, 2007).
- S128. W. E. Welmers, *African language structures*. (University of California Press, Berkeley, 1974), pp. xi, 488
- S129. E. J. Parra *et al.*, *Am J Hum Genet* 63, 1839 (Dec, 1998).
- S130. A. Salas *et al.*, *Am J Phys Anthropol* 128, 855 (Dec, 2005).
- S131. J. M. Lind *et al.*, *Hum Genet* 120, 713 (Jan, 2007).
- S132. M. W. Smith *et al.*, *Am J Hum Genet* 74, 1001 (May, 2004).
- S133. E. J. Parra *et al.*, *Am J Phys Anthropol* 114, 18 (Jan, 2001).
- S134. <http://www.slavevoyages.org/tast/index.faces>.
- S135. G. T. Nurse, J. S. Weiner, T. Jenkins, *The Peoples of Southern Africa and Their Affinities*. (Oxford University Press, New York, 1985), pp. 409.
- S136. J. S. Marais, *The Cape Coloured People, 1652-1937* (Witwatersrand University Press, Johannesburg, 1968), pp. 296.
- S137. P. Mellars, *Proc Natl Acad Sci U S A* 103, 9381 (Jun 20, 2006).
- S138. S. McBrearty, A. Brooks, *Journal of Human Evolution* 39, 453 (2000).
- S139. C. S. Henshilwood *et al.*, *Science* 295, 1278 (Feb 15, 2002).
